# Supplementary material for: Avoidance response to CO2 in the lateral horn
Source: PLoS Biol. 2019 Jan 17;17(1):e2006749. doi: 10.1371/journal.pbio.2006749 (PMC6336243; doi:10.1371/journal.pbio.2006749)
Supplement: S1 Data — (XLSX) [file pbio.2006749.s009.xlsx]

## Sheet: Fig.1A
	21G11GAL4				23C09GAL4
	without UASKir 2.1		with UASKir2.1kir		without UASKir 2.1		with UASKir2.1kir
N	18ºC	30ºC	18ºC	30ºC	18ºC	30ºC	18ºC	30ºC
1	-0.67	-0.76	-0.75	-0.29	-1	-0.83	-0.78	0.06
2	-0.79	-0.5	-0.73	-0.54	-1	-0.63	-0.54	-0.65
3	-0.76	-0.88	-0.87	-0.53	-0.79	-0.76	-0.88	-0.65
4	-0.46	-0.85	-0.87	-0.47	-0.87	-0.75	-0.75	-0.18
5	-0.76	-0.6	-0.85	-0.5	-0.7	-0.75	-0.79	-0.33
6	-0.89	-0.79	-1	-0.29	-0.73	-0.73	-1	-0.26
7	-0.88	-0.63	-0.86	-0.23	-0.76	-0.76	-0.78	-0.33
8	-0.86	-0.85	-0.89	-0.25	-0.88	-0.88	-0.73	-0.53
9	-0.88	-1	-0.78	-0.57	-1	-1	-0.76	-0.41
10	-0.92	-1	-0.88	-0.23	-0.67	-0.67	-1	-0.5

## Sheet: Fig.1B
N	LexAopKir2.1	21G11LexA	21G11LexA
			0.5%CO2	1%CO2	2%CO2
1	-0.789474	-0.888889	-0.71	-0.23	-0.33
2	-0.777778	-1	-0.63	-0.7	-0.67
3	-0.8	-0.875	-0.65	-0.47	-0.57
4	-1	-1	-0.29	-0.63	-0.78
5	-0.857143	-0.857143	-0.33	-0.56	-0.08
6	-1	-0.764706	-0.6	-0.22	-0.5
7	-0.625	-1	-0.25	-0.73	-0.27
8	-0.888889	-1	-0.54	-0.43	-0.41
9	-0.733333	-0.692308	-0.27	-0.54	-0.56
10	-0.777778	-0.875	-0.25	-0.63	-0.5

## Sheet: Fig.1C
N	UASKir2.1,TubGal80ts 30ºC	23C09Vglut 30ºC	23C09Vglut 18ºC (0.5%)	23C09Vglut 30ºC (0.5%)	23C09Vglut 18ºC (1%)	23C09Vglut 30ºC (1%)	23C09Vglut 18ºC (2%)	23C09Vglut 30ºC (2%)
1	-0.882353	-0.875	-1	-0.5	-0.89	-0.57	-0.88	-0.45
2	-1	-0.777778	-1	-0.73	-1	0.87	-0.83	-0.2
3	-0.857143	-1	-0.83	-0.56	-0.76	0	-0.78	0.14
4	-0.846154	-1	-0.63	-0.5	-0.88	-0.71	-0.76	-0.47
5	-1	-0.882353	-0.88	-0.5	-0.8	-0.63	-1	0
6	-0.75	-0.875	-1	0.06	-1	-0.38	-1	0.06
7	-0.875	-0.875	-1	-0.54	-0.75	-0.53	-0.75	-0.54
8	-0.733333	-0.714286	-0.88	-0.33	-0.79	-0.38	-0.75	-0.67
9	-1		-0.88	-0.65	-1	0.06	-0.76	-0.37
10	-0.882353		-0.88	-0.63			-0.73	-0.67

## Sheet: Fig.2A and Fig.2B
21G11GAL4,UASGCaMP6.0m response to Air, 0.5% CO2, 1% CO2 and 2% CO2
Time	Air											0.5%											0.01											0.02
0.2	3177623	3204784	3474044	3316996	3453340	3433010	3341708	3725623	3648561	3714644	4394133	3177623	3204784	2845798	3683745	3591176	3184395	3557693	3758523	4432426	1773914	1925172	3273086	3277608	3103361	3614774	3584137	3273086	3506244	3686526	4358197	1765232	1877252	3536679	3474810	4149916	3882215	3888456	3452264	3954865	3750341	4393251	1803611	1815715
0.4	3286154	3194811	3494781	3347163	3443080	3426079	3351865	3711542	3667010	3715325	4364177	3286154	3194811	2837185	3687491	3627581	3179263	3511235	3748819	4415916	1780237	1912606	3248940	3253473	2841891	3605774	3614652	3248940	3541448	3682982	4361840	1766119	1873134	3520485	3455899	4314454	3809085	3892363	3477648	3961203	3748535	4431700	1799383	1817016
0.6	3278097	3235514	3525916	3378611	3414973	3400257	3324709	3706704	3684539	3700737	4385022	3278097	3235514	2844832	3651660	3598412	3150758	3574213	3730448	4427262	1774367	1904654	3280995	3284379	3106219	3559682	3588412	3280995	3511863	3669677	4387034	1767360	1874888	3539129	3473794	4118235	3899544	3852838	3463810	3959261	3765716	4425261	1811008	1817907
0.8	3197195	3204784	3511905	3350369	3431604	3393270	3297448	3708958	3693329	3740072	4386578	3197195	3204784	2837983	3656001	3601713	3197195	3551273	3730959	4433302	1784684	1895338	3274800	3281774	3187269	3575193	3620623	3274800	3538548	3667285	4366210	1763570	1870536	3506489	3476993	4178151	3895236	3884076	3475075	3973266	3775814	4439279	1805112	1813925
1	3182305	3194811	3483771	3344216	3453794	3425910	3333031	3719778	3672692	3712677	4383164	3182305	3194811	2845798	3631484	3605144	3182305	3541186	3754999	4462014	1777345	1905065	3248741	3256523	2934958	3574939	3587884	3248741	3510948	3649801	4352002	1763193	1884447	3477113	3455899	3991050	3843079	3871940	3480921	3959261	3780670	4422556	1808775	1807961
1.2	3223295	3235514	3507287	3359182	3478476	3458851	3324055	3719913	3670187	3713647	4364979	3223295	3235514	2939076	3560733	3571301	3223295	3538333	3711542	4474734	1808033	1899561	3298974	3301459	2865336	3560663	3611503	3298974	3536484	3663586	4362734	1777224	1887420	3472624	3489423	4031681	3847085	3866208	3497314	3977352	3755960	4425086	1810065	1813294
1.4	3212707	3222339	3530629	3362058	3434609	3428026	3299661	3725843	3662363	3716123	4380917	3212707	3222339	2641723	3609001	3593105	3212707	3542872	3706704	4476866	1794032	1918062	3274471	3281611	3088698	3605435	3602098	3274471	3523988	3674178	4368037	1765558	1887680	3522044	3465449	4078866	3893342	3881635	3488166	3954362	3726108	4436059	1826079	1795018
1.6	3177623	3191913	3504078	3391216	3459677	3434718	3305449	3740868	3666149	3727653	4397006	3177623	3191913	2617437	3627020	3547584	3177623	3560095	3708958	4479210	1776764	1910802	3257026	3262900	2845714	3583593	3625724	3257026	3542900	3661214	4374740	1764826	1875094	3524508	3476929	4035924	3870534	3846565	3468790	3963517	3745912	4462892	1823566	1799403
1.8	3165477	3170451	3540927	3373277	3474786	3504016	3300682	3738353	3660638	3731909	4421879	3165477	3170451	2571639	3653890	3651196	3165477	3593781	3719778	4475339	1792465	1915347	3255840	3256024	2906765	3571843	3587339	3255840	3513345	3666333	4365574	1772709	1871018	3486165	3489063	3794454	3850280	3873694	3479326	3928653	3761003	4431821	1819122	1819467
2	3213484	3222558	3465325	3316679	3452373	3448369	3261150	3747173	3675864	3731410	4397491	3213484	3222558	2971471	3592025	3642051	3213484	3557147	3719913	4465410	1791530	1923169	3254086	3258451	3255294	3625534	3570651	3254086	3494873	3659976	4376010	1776243	1875492	3492930	3438202	4137353	3831001	3869041	3497283	3930394	3756792	4424566	1807755	1819223
2.2	3171786	3177934	3513101	3362116	3459755	3541124	3297777	3728822	3647851	3728582	4393134	3171786	3177934	2645462	3599078	3641733	3171786	3581671	3725843	4463746	1792371	1921212	3236586	3241412	3062647	3552727	3584696	3236586	3505526	3678326	4368497	1755163	1861410	3510602	3466800	4152269	3850804	3883972	3445085	3932943	3763481	4415388	1824325	1804067
2.4	3199658	3207672	3514276	3332299	3436216	3504900	3286534	3713782	3660962	3716516	4383360	3199658	3207672	2746891	3615688	3670413	3199658	3574213	3740868	4431276	1790016	1929261	3265821	3270149	3061723	3588762	3624355	3265821	3538813	3678584	4360195	1766043	1890216	3502900	3453565	4022605	3805570	3914561	3465582	3923768	3747317	4438422	1818339	1799167
2.6	3175235	3186339	3491881	3335869	3443034	3567714	3294832	3734001	3662807	3727686	4390753	3175235	3186339	2934916	3628550	3621097	3175235	3551273	3738353	4476485	1788680	1935593	3265089	3266465	2992437	3542604	3571222	3265089	3491815	3680116	4369331	1757154	1880354	3497086	3491868	3936891	3856132	3885742	3457552	3980095	3744763	4405863	1804814	1800278
2.8	3174040	3184057	3510936	3350352	3453767	3500616	3272808	3738131	3641437	3750131	4348432	3174040	3184057	2668781	3579674	3653748	3174040	3581671	3747173	4470728	1779921	1923619	3272854	3280267	3070126	3602632	3577599	3272854	3497697	3675835	4393713	1757136	1879001	3503844	3476993	4472983	3872037	3908544	3493697	3928945	3740349	4387832	1808102	1803804
3	3188243	3198304	3506088	3379859	3481394	3554138	3306562	3729418	3648323	3730540	4368103	3188243	3198304	2748781	3639327	3640871	3188243	3574213	3728822	4469214	1798383	1922713	3244868	3251449	2911891	3569291	3575017	3244868	3503991	3671340	4367575	1757686	1879387	3487866	3506017	4595084	3867698	3904110	3531018	3983618	3757282	4400323	1795511	1786337
3.2	3168453	3180596	3507255	3363764	3451926	3531455	3299317	3739326	3656204	3721243	4397687	3168453	3180596	2713740	3637462	3621885	3168453	3551273	3713782	4489656	1791198	1929413	3244184	3251313	3037773	3556091	3565528	3244184	3493851	3685598	4353438	1757134	1883443	3478814	3476993	4413193	3896615	3903141	3512917	3951416	3762121	4401215	1806601	1800804
3.4	3162842	3180670	3474669	3348635	3445226	3533505	3316031	3730288	3621819	3720710	4407518	3162842	3180670	2845924	3631709	3606493	3162842	3541186	3734001	4447785	1783066	1926068	3227893	3236095	2901891	3540782	3573694	3227893	3496810	3667278	4349964	1766791	1890770	3508338	3498908	4328992	3877240	3917643	3511374	3982859	3779960	4393519	1816582	1803765
3.6	3182297	3194281	3468232	3355016	3450020	3476782	3305814	3761505	3658628	3736747	4368339	3182297	3194281	2772017	3599174	3607609	3182297	3538333	3738131	4446848	1790446	1929932	3254830	3256691	2930840	3547270	3603146	3254830	3518351	3672670	4373884	1773314	1862255	3518004	3466800	4130672	3878320	3902642	3514778	3940217	3763707	4408397	1815746	1793227
3.8	3163600	3174996	3461665	3376842	3450290	3487794	3306885	3753067	3661265	3718835	4382559	3163600	3174996	2976807	3658806	3619868	3163600	3543865	3729418	4454792	1777183	1926462	3253532	3254217	3017689	3562920	3608203	3253532	3524402	3662014	4372868	1768335	1879053	3490671	3476993	4175714	3835534	3922837	3514606	3947302	3769122	4378561	1820262	1795085
4	3161133	3168142	3510782	3341708	3463852	3437023	3281155	3734598	3669955	3729515	4365386	3161133	3168142	2775252	3618984	3616290	3161133	3543423	3739326	4434161	1777772	1919130	3194457	3199134	3062773	3602459	3593109	3194457	3514913	3653054	4346380	1782089	1870360	3480827	3498908	4407773	3813946	3920052	3524182	3964926	3758428	4386930	1813593	1808112
4.2	3163511	3180507	3486479	3351865	3450423	3463091	3257904	3742775	3652076	3719056	4389433	3163511	3180507	2763025	3612468	3628776	3163511	3557693	3730288	4461488	1780323	1930993	3263822	3270314	2932017	3560994	3614886	3263822	3529619	3672075	4366889	1777744	1879977	3515777	3507363	3939034	3801998	3906097	3507340	3954865	3752236	4401711	1812304	1809418
4.4	3146429	3163387	3509109	3324709	3472575	3447667	3238711	3742147	3642646	3732695	4386282	3146429	3163387	2661093	3640605	3581315	3146429	3511235	3761505	4449927	1787504	1916114	3270821	3273493	2867311	3561299	3578486	3270821	3489969	3661778	4369451	1778603	1871899	3456852	3476993	4109664	3812247	3888372	3511075	3961203	3757645	4376853	1796321	1804035
4.6	3192410	3200004	3496719	3297448	3452863	3449519	3266852	3743735	3663950	3713679	4385639	3192410	3200004	2845798	3565939	3601432	3192410	3530863	3753067	4482574	1787874	1902084	3234505	3242028	3156807	3592795	3606538	3234505	3535476	3653650	4366348	1767751	1863060	3451610	3455899	4158824	3814810	3919977	3545812	3959261	3750143	4389626	1822532	1816577
4.8	3159867	3175501	3517109	3333031	3426263	3429073	3304763	3749801	3652884	3709701	4378377	3159867	3175501	2635336	3587695	3597705	3159867	3533129	3734598	4464944	1778432	1898627	3233492	3238470	3010924	3572413	3595492	3233492	3519502	3681289	4380005	1772382	1880859	3478036	3506256	4136555	3814681	3889331	3506630	3954362	3757784	4389922	1799527	1790201
5	3182383	3198203	3474517	3324055	3469386	3479244	3304284	3750367	3652552	3709441	4410105	3182383	3198203	2821176	3584249	3612949	3182383	3541950	3742775	4470208	1792973	1909404	3246383	3252040	3168067	3548731	3577994	3246383	3504456	3658912	4359960	1775470	1880251	3464234	3476993	4178151	3851880	3869983	3508379	3963517	3768679	4377089	1810844	1806291
5.2	3161685	3176564	3501292	3299661	3479920	3465922	3299348	3761404	3650521	3704219	4420670	3161685	3176564	2754496	3656393	3589554	3161685	3521303	3742147	4442845	1785259	1910449	3241633	3248016	3158571	3569138	3589135	3241633	3516202	3662165	4397970	1774684	1872017	3488504	3466800	3991050	3877196	3910245	3533666	3928653	3767184	4390733	1815052	1802043
5.4	3194917	3206725	3507431	3305449	3437412	3462827	3316906	3744484	3652812	3711336	4394699	3194917	3206725	2837185	3631595	3566496	3194917	3501544	3743735	4437103	1773914	1907859	3230070	3237249	3142899	3590994	3601201	3230070	3516124	3656489	4375555	1767685	1862622	3481725	3489828	4031681	3887063	3899443	3537292	3930394	3765863	4374071	1810249	1797833
5.6	3155270	3168165	3499818	3300682	3468648	3448014	3334155	3751707	3632126	3723613	4369857	3155270	3168165	2844832	3556412	3588477	3155270	3510304	3749801	4414199	1780237	1922062	3202232	3209758	2956891	3566581	3582234	3202232	3510624	3671166	4373762	1758698	1871860	3520355	3466800	4078866	3873916	3903150	3494881	3932943	3761632	4401822	1821013	1811324
5.8	3167647	3179952	3511889	3261150	3431353	3452422	3314826	3758523	3645525	3707242	4342890	3167647	3179952	2837983	3592422	3553883	3167647	3492079	3750367	4428962	1774367	1917679	3275869	3283121	3058907	3544235	3574674	3275869	3504585	3676274	4360111	1764168	1863082	3499852	3476993	4035924	3874906	3904010	3540199	3923768	3777612	4409760	1803376	1797351
6	3181909	3198022	3538434	3297777	3467694	3426664	3301644	3748819	3663771	3719902	4360687	3181909	3198022	2900378	3621460	3572417	3181909	3504936	3761404	4448070	1784684	1931904	3260766	3257892	3090882	3526324	3601870	3260766	3521674	3671235	4398125	1766866	1866290	3500553	3466800	3794454	3805029	3884656	3513486	3980095	3764630	4425380	1800106	1816628
6.2	3200124	3202173	3520009	3286534	3443433	3456738	3303295	3730448	3649292	3739523	4349642	3200124	3202173	2747731	3618466	3588264	3200124	3514051	3744484	4409323	1777345	1917483	3252731	3258604	3073361	3559326	3581295	3252731	3511546	3686360	4393159	1763070	1874971	3466916	3498908	4322269	3879633	3895458	3547718	3961203	3763708	4421390	1804264	1807730
6.4	3136545	3143739	3513508	3294832	3450848	3443805	3346390	3730959	3638087	3713803	4371328	3136545	3143739	2621765	3636856	3595274	3136545	3520264	3751707	4456028	1785091	1904686	3227160	3237981	2992941	3588799	3592458	3227160	3519103	3685182	4398115	1780106	1883745	3518895	3455899	4318025	3898202	3847013	3527078	3959261	3768300	4438165	1822910	1803980
6.6	3146357	3160464	3520980	3272808	3474810	3464352	3291884	3754999	3637794	3724319	4366447	3146357	3160464	2832185	3653012	3579857	3146357	3509409	3758523	4469919	1788745	1919993	3269801	3274055	3095672	3577925	3595564	3269801	3525698	3666310	4376696	1762264	1876790	3491326	3476929	4325042	3896603	3891922	3507402	3973266	3758191	4407261	1803026	1806476
6.8	3168210	3175491	3491531	3306562	3455899	3488708	3298931	3746662	3643725	3709709	4392281	3168210	3175491	2727185	3620666	3598676	3168210	3532099	3748819	4429449	1786056	1914783	3256346	3256365	3235252	3573878	3602356	3256346	3531513	3670345	4366730	1777154	1879852	3504118	3476993	4045966	3891861	3881431	3546635	3959261	3766639	4410632	1807659	1794705
7	3186376	3187872	3467307	3299317	3473794	3438498	3302523	3753325	3635515	3741068	4395266	3186376	3187872	2711345	3656393	3568951	3186376	3506798	3730448	4405702	1776814	1915357	3238265	3241823	2956386	3607983	3591550	3238265	3508182	3691098	4372092	1773293	1892557	3530983	3498908	4142857	3816585	3872214	3550845	3977352	3774773	4405311	1812255	1807717
7.2	3172568	3179574	3514015	3316031	3476993	3446097	3313275	3760369	3626316	3722509	4377491	3172568	3179574	2785714	3631595	3566736	3172568	3501810	3730959	4432426	1772897	1915928	3264462	3267192	2734664	3583149	3609646	3264462	3517387	3678974	4354843	1781982	1877057	3532258	3466800	4048950	3882215	3895452	3530983	3954362	3777114	4379506	1817534	1798046
7.4	3191374	3199856	3431604	3305814	3455899	3448551	3308195	3750357	3625465	3721919	4405904	3191374	3199856	2650336	3556412	3585089	3191374	3520261	3754999	4415916	1772463	1915770	3222159	3231418	3090546	3549303	3596919	3222159	3510270	3679898	4394304	1783826	1878921	3525164	3455899	4118487	3867698	3869583	3532258	3963517	3784643	4409115	1816377	1814234
7.6	3180190	3180332	3453794	3306885	3489423	3436185	3305420	3749539	3623056	3723159	4364235	3180190	3180332	2733361	3592422	3580205	3180190	3508979	3746662	4427262	1777366	1914261	3270926	3277044	3100672	3513060	3635321	3270926	3549910	3670183	4359511	1770335	1869113	3442275	3466800	4196513	3896615	3878641	3525164	3928653	3779196	4407224	1817184	1814296
7.8	3160266	3172485	3478476	3281155	3465449	3462494	3288227	3758612	3644114	3731538	4360454	3160266	3172485	2835756	3621460	3558166	3160266	3502132	3753325	4433302	1776587	1921853	3251335	3248954	3215630	3539529	3609147	3251335	3524362	3681505	4378399	1778976	1882083	3494680	3476993	4046345	3877240	3874787	3564401	3930394	3779082	4402645	1809402	1800106
8	3165873	3176834	3434609	3257904	3476929	3448993	3323893	3730297	3625335	3736249	4374722	3165873	3176834	2708655	3618466	3573837	3165873	3504986	3760369	4462014	1765902	1909143	3247083	3254044	3134580	3548385	3617137	3247083	3524430	3664547	4370435	1770207	1876604	3464283	3489423	4037017	3878320	3879013	3567955	3932943	3789045	4425534	1813794	1807410
8.2	3150987	3160087	3459677	3238711	3489063	3419699	3321525	3733685	3624768	3735876	4369123	3150987	3160087	2749748	3578388	3580119	3150987	3513903	3750357	4474734	1779457	1922165	3200725	3207757	3068193	3572524	3630150	3200725	3548182	3682979	4393714	1768863	1866114	3472415	3466800	4407773	3835534	3888577	3578326	3923768	3768716	4393441	1804383	1802272
8.4	3160065	3177023	3474786	3266852	3438202	3446364	3329574	3753839	3633671	3742929	4386242	3160065	3177023	2708529	3593313	3582373	3160065	3509410	3749539	4425099	1766412	1925517	3255031	3263217	3096471	3532935	3616551	3255031	3532657	3671615	4382815	1770849	1863261	3444959	3499290	3939034	3813946	3862048	3524518	3980095	3769991	4428486	1810043	1800287
8.6	3137299	3143539	3452373	3304763	3466800	3465502	3281543	3757492	3640464	3728180	4391412	3137299	3143539	2782311	3611390	3566277	3137299	3503609	3758612	4439716	1780048	1925172	3243430	3248284	3081471	3556622	3619331	3243430	3532562	3671830	4391765	1774228	1868962	3477087	3466800	4109664	3801998	3905150	3586127	3938937	3767531	4442631	1823064	1796738
8.8	3161889	3165302	3459755	3304284	3453565	3437230	3312349	3759444	3619880	3736084	4384440	3161889	3165302	2805504	3678441	3562202	3161889	3501434	3730297	4450872	1775998	1912606	3241132	3244846	3263403	3549310	3607652	3241132	3521660	3672743	4402606	1770344	1870257	3484547	3466800	4158824	3812247	3903827	3538087	3982859	3777377	4418595	1814954	1817012
9	3180546	3195303	3436216	3299348	3491868	3475088	3316126	3770607	3830471	3767245	4374453	3180546	3195303	2808319	3685514	3562467	3180546	3491191	3733685	4417004	1782781	1904654	3239027	3246115	3222353	3561566	3584712	3239027	3498287	3662065	4400677	1764245	1870744	3477283	3455899	4136555	3814810	3905431	3522792	3940217	3800735	4422548	1803803	1808133
9.2	3136330	3146051	3443034	3316906	3476993	3450051	3329095	3746655	3684260	3728380	4358914	3136330	3146051	2802857	3637462	3569701	3136330	3493276	3753839	4383088	1779821	1895338	3258700	3264270	3259706	3604452	3605485	3258700	3519621	3663058	4405490	1770724	1877492	3475673	3466800	4138866	3814681	3907564	3560891	3947302	3767647	4414145	1816956	1808795
9.4	3199944	3205969	3453767	3334155	3506017	3454104	3295779	3749274	3645879	3752922	4353624	3199944	3205969	2701219	3683745	3575432	3199944	3497577	3757492	4385204	1773141	1905065	3236775	3243718	3084160	3560328	3637461	3236775	3544294	3678062	4397660	1776948	1870588	3492609	3466800	4318025	3851880	3932834	3524737	3964926	3776163	4404979	1816440	1792194
9.6	3179263	3180613	3481394	3314826	3476993	3423388	3334883	3757617	3644084	3750341	4402321	3179263	3180613	2912227	3687491	3563594	3179263	3493996	3759444	4408089	1783620	1899561	3287461	3288276	3185378	3573132	3622131	3287461	3533842	3653844	4423032	1777227	1871694	3498277	3498908	4325042	3848344	3877857	3533115	3954865	3774351	4394294	1810935	1810602
9.8	3150758	3157898	3451926	3301644	3498908	3432200	3308152	3750142	3636981	3748535	4395181	3150758	3157898	2638529	3651660	3578796	3150758	3515009	3770607	4420521	1768728	1918062	3208434	3214621	2975966	3595007	3631104	3208434	3541878	3636903	4417488	1779301	1884469	3460070	3438202	4045966	3899281	3937329	3547981	3961203	3809934	4375235	1814229	1798341
10	3150649	3156877	3445226	3303295	3466800	3424371	3349519	3760238	3622427	3765716	4435258	3150649	3156877	2595714	3650644	3595303	3150649	3524445	3746655	4420550	1774631	1910802	3266198	3269014	3088866	3538907	3640575	3266198	3553145	3645596	4419113	1775397	1861275	3503376	3438202	4142857	3824228	3967160	3553281	3959261	3788242	4379554	1809483	1790459
10.2	3172447	3182378	3450020	3346390	3476993	3441617	3301981	3754002	3637049	3775814	4418200	3172447	3182378	2933614	3691559	3572158	3172447	3503893	3749274	4443463	1783989	1925628	3245479	3246700	3180756	3617034	3614626	3245479	3522225	3662990	4406950	1770355	1869781	3524699	3476993	4048950	3832717	3964053	3539920	3973266	3794360	4392374	1813058	1815379
10.4	3142745	3151552	3450290	3291884	3498908	3383933	3352713	3743423	3635565	3780670	4428110	3142745	3151552	2811807	3688972	3569137	3142745	3494441	3757617	4431880	1776712	1924114	3274590	3283688	3123781	3561709	3640429	3274590	3552212	3671797	4393524	1773309	1873838	3493508	3489423	4118487	3882304	3948738	3585894	3961203	3791331	4420718	1815250	1796003
10.6	3184395	3190887	3463852	3298931	3507363	3403656	3308570	3768658	3637583	3755960	4405332	3184395	3190887	2767521	3695121	3569898	3184395	3503763	3750142	4397118	1774485	1906507	3241794	3245317	2981429	3560936	3645984	3241794	3549678	3658350	4376992	1778390	1860828	3487599	3476929	4196513	3880087	3928169	3544084	3977352	3799355	4391881	1811360	1786269
10.8	3186716	3194504	3450423	3302523	3476993	3406898	3331327	3753600	3628199	3726108	4396821	3186716	3194504	2946597	3674213	3563820	3186716	3490334	3760238	4385263	1776948	1914376	3257555	3267463	3406471	3547582	3656692	3257555	3557173	3650543	4371982	1770882	1862922	3518405	3503675	4046345	3896603	3937285	3548697	3954362	3792074	4398142	1804230	1791140
11	3191458	3190758	3472575	3313275	3455899	3453340	3300384	3738136	3639955	3745912	4411183	3191458	3190758	2798992	3692240	3563889	3191458	3491751	3754002	4426834	1769380	1911991	3253996	3256128	3221219	3613982	3634517	3253996	3542603	3657295	4383555	1762158	1856147	3485703	3489423	4037017	3891861	3952546	3514088	3942451	3806653	4399587	1819504	1795007
11.2	3168748	3175204	3452863	3308195	3506256	3443080	3322556	3721865	3607870	3761003	4419443	3168748	3175204	2668151	3636856	3543178	3168748	3475344	3743423	4430785	1784001	1910132	3270524	3273715	3137731	3609380	3611804	3270524	3526645	3643435	4374024	1775086	1879156	3496777	3438202	3736597	3916585	3951246	3502585	3938937	3814725	4386734	1817667	1798414
11.4	3136119	3138516	3426263	3305420	3476993	3414973	3295864	3726475	3641697	3756792	4413977	3136119	3138516	2871513	3653012	3567550	3136119	3505734	3768658	4412338	1781857	1910361	3227309	3232172	3197437	3572199	3618479	3227309	3535503	3656527	4389570	1782623	1877362	3495729	3455899	4340630	3882215	3933348	3532628	3930394	3789747	4371699	1810844	1789502
11.6	3164106	3168526	3469386	3288227	3466800	3431604	3347294	3734121	3651294	3763481	4413967	3164106	3168526	2705000	3620666	3547669	3164106	3477609	3753600	4423259	1785353	1931808	3281951	3287014	3223067	3563721	3623814	3281951	3530751	3673816	4370650	1768119	1865488	3519292	3466800	3923109	3867698	3953679	3527638	3932943	3810083	4388825	1796915	1803692
11.8	3183851	3185172	3479920	3323893	3489828	3453794	3340729	3704103	3627050	3747317	4401490	3183851	3185172	2870588	3670642	3548190	3183851	3485689	3738136	4401236	1773163	1910441	3246659	3252287	3179370	3588509	3617747	3246659	3538563	3648561	4402117	1777378	1878596	3461053	3476993	3906891	3896615	3970265	3505656	3923768	3794199	4388800	1807780	1800319
12	3151476	3162280	3437412	3321525	3466800	3478476	3217880	3724435	3643264	3744763	4384723	3151476	3162280	2656849	3648974	3595347	3151476	3520226	3721865	4403119	1770224	1911195	3256085	3257794	3095126	3562603	3614851	3256085	3523016	3667010	4391426	1773540	1856051	3494680	3466800	3987521	3880087	3977072	3553105	3980095	3805728	4383153	1820460	1788730
12.2	3175859	3186999	3468648	3329574	3476993	3434609	3219160	3711614	3647594	3740349	4378951	3175859	3186999	2919202	3619716	3588106	3175859	3518956	3726475	4419618	1774559	1904082	3246311	3256349	3034370	3591638	3618959	3246311	3526989	3684539	4391023	1768047	1854701	3464283	3473794	4063529	3996603	3941803	3551779	3961203	3795269	4412257	1811579	1794173
12.4	3170742	3181201	3431353	3281543	3466800	3459677	3195324	3721658	3639556	3757282	4385304	3170742	3181201	2671639	3632374	3562049	3170742	3507283	3734121	4402106	1779658	1910486	3251353	3253683	3257605	3582051	3609201	3251353	3513139	3693329	4388523	1769870	1865136	3472415	3466800	3890588	3991861	3965752	3601374	3983618	3791331	4383676	1799684	1797606
12.6	3173149	3177434	3467694	3312349	3498908	3474786	3171798	3721909	3627783	3762121	4382988	3173149	3177434	2967731	3656033	3591176	3173149	3522606	3704103	4407858	1777431	1911863	3269539	3268818	3266639	3564206	3633873	3269539	3545058	3672692	4406669	1773928	1860476	3444959	3489423	4201176	3916585	3969721	3565548	3932943	3816540	4392667	1824521	1795399
12.8	3155445	3159696	3443433	3316126	3455899	3452373	3193409	3729102	3629730	3779960	4365865	3155445	3159696	2655504	3682430	3627581	3155445	3552550	3724435	4412941	1768309	1912071	3255873	3257531	3235084	3563882	3653893	3255873	3567237	3670187	4358137	1769030	1861042	3477087	3438202	4212521	3982215	3918498	3575400	3961203	3806250	4360120	1817774	1797612
13	3175897	3185553	3450848	3329095	3476929	3459755	3181710	3723882	3636777	3763707	4368735	3175897	3185553	2754580	3603757	3598412	3175897	3526490	3711614	4420163	1757712	1901204	3240324	3244464	3192941	3568431	3651118	3240324	3553878	3662363	4384834	1764143	1871652	3484547	3466800	4183067	3909085	3962629	3575422	3980095	3800631	4397397	1813127	1804035
13.2	3147402	3153946	3474810	3295779	3476993	3436216	3196935	3728409	3635539	3769122	4385928	3147402	3153946	2694664	3587382	3601713	3147402	3525129	3721658	4427158	1765307	1912695	3215034	3220706	3217185	3607003	3659675	3215034	3558672	3666149	4411744	1769129	1861654	3477283	3476993	3880462	3999544	3957388	3559499	3961203	3813364	4391110	1809541	1796712
13.4	3168640	3180233	3455899	3334883	3498908	3443034	3148665	3728030	3637817	3758428	4417160	3168640	3180233	2935126	3656001	3605144	3168640	3519872	3721909	4422950	1764372	1911203	3244297	3251049	3111345	3544824	3668824	3244297	3569341	3660638	4400519	1769912	1867388	3475673	3466800	4136555	3995236	3987047	3558282	3959261	3812001	4401677	1831712	1788718
13.6	3152523	3162131	3473794	3308152	3466800	3453767	3194833	3716448	3620002	3752236	4370521	3152523	3162131	2691849	3631484	3571301	3152523	3499554	3729102	4413620	1750404	1920254	3274539	3281270	3310378	3529356	3650580	3274539	3562560	3675864	4391476	1760026	1867696	3492609	3476929	4178151	3943079	3997756	3540558	3973266	3816369	4386299	1819775	1781334
13.8	3193833	3206348	3476993	3349519	3455899	3481394	3202108	3711151	3644884	3757645	4393944	3193833	3206348	2711134	3560733	3593105	3193833	3520258	3723882	4423827	1754547	1906468	3247132	3251356	3262647	3581088	3651696	3247132	3563756	3647851	4385840	1759514	1866262	3498277	3438202	3991050	3947085	3970251	3607280	3959261	3805763	4364226	1819963	1782024
14	3127336	3132116	3455899	3301981	3466800	3451926	3247236	3714095	3638492	3750143	4375458	3127336	3132116	2695756	3609001	3547584	3127336	3473459	3728409	4416075	1763554	1919519	3241397	3241135	3200840	3603770	3643722	3241397	3554323	3660962	4398805	1761497	1858365	3460070	3466800	4031681	3993342	3998294	3582381	3977352	3802490	4385732	1823083	1791035
14.2	3157955	3166510	3489423	3352713	3476993	3445226	3193774	3717094	3617118	3757784	4366362	3157955	3166510	2715084	3627020	3583481	3157955	3507547	3728030	4386311	1760727	1921626	3246150	3251800	3080840	3534191	3683463	3246150	3584682	3662807	4391793	1759423	1859139	3503376	3438202	4078866	3970534	3989215	3581135	3982859	3817036	4384789	1827767	1795672
14.4	3159101	3165174	3465449	3308570	3489423	3450020	3208556	3693873	3622880	3768679	4355289	3159101	3165174	2862395	3653890	3570402	3159101	3494806	3716448	4372913	1759460	1909551	3291997	3289389	3189916	3559262	3634938	3291997	3550827	3641437	4376701	1758112	1875339	3524699	3476993	4035924	3950280	4000572	3577799	3940217	3799725	4373322	1830715	1786949
14.6	3154866	3168772	3476929	3331327	3466800	3450290	3196995	3713258	3635684	3767184	4359966	3154866	3168772	2889286	3592025	3581516	3154866	3510144	3711151	4383365	1761075	1915551	3264380	3263405	3181176	3580055	3617360	3264380	3536218	3648323	4362037	1766922	1854944	3493508	3438202	3794454	3931001	3962910	3611888	3947302	3819123	4394344	1825996	1781298
14.8	3129193	3143542	3489063	3300384	3499290	3463852	3222459	3724347	3640093	3765863	4379461	3129193	3143542	2866008	3599078	3550479	3129193	3484486	3714095	4384001	1765824	1911936	3253698	3258432	3175714	3567591	3625782	3253698	3536461	3656204	4390074	1766201	1870858	3487599	3438202	4322269	3950804	3960115	3606586	3964926	3818948	4408599	1823352	1795649
15	3147137	3153297	3438202	3322556	3466800	3450423	3233051	3723159	3646078	3761632	4354850	3147137	3153297	2853403	3615688	3543767	3147137	3471821	3717094	4389937	1768868	1919610	3258788	3260439	3169496	3620388	3631565	3258788	3541160	3621819	4372962	1770975	1863207	3518405	3489423	4318025	3905570	3966467	3545759	3954865	3809882	4416479	1820545	1788700
15.2	3119962	3126505	3466800	3295864	3466800	3472575	3196920	3718909	3644051	3777612	4382486	3119962	3126505	2770462	3628550	3557331	3119962	3479718	3693873	4376895	1751880	1902403	3237873	3238640	3463781	3547761	3650967	3237873	3559153	3658628	4371809	1770096	1865872	3485703	3466800	4325042	3956132	3961657	3543724	3961203	3814896	4407279	1827531	1800909
15.4	3174871	3184121	3453565	3347294	3455899	3452863	3220342	3706500	3658231	3764630	4362086	3174871	3184121	2641975	3579674	3598617	3174871	3525432	3713258	4399091	1756517	1884454	3311277	3313234	2959286	3551183	3671534	3311277	3586138	3661265	4363556	1771332	1866768	3506489	3476993	4045966	3972037	3978926	3570148	3959261	3791331	4405740	1829777	1794194
15.6	3154750	3162502	3491868	3340729	3466800	3426263	3225316	3717330	3646254	3763708	4379553	3154750	3162502	2707857	3639327	3548435	3154750	3475098	3724347	4384551	1757479	1906042	3251011	3257770	3232353	3563140	3640945	3251011	3553096	3669955	4381010	1775027	1849992	3477113	3465449	4142857	3967698	3940609	3524412	3954362	3792074	4398499	1828846	1808753
15.8	3167029	3177339	3476993	3433010	3466800	3469386	3174760	3717535	3641615	3768300	4487209	3167029	3177339	2768025	3637462	3564350	3167029	3487741	3723159	4387350	1748853	1912499	3298122	3304582	3135168	3571545	3611304	3298122	3526253	3652076	4386927	1775151	1862206	3472624	3491868	4118235	3996615	3927653	3544099	3963517	3806653	4399600	1819767	1795581
16	3149567	3156218	3506017	3426079	3498908	3479920	3219772	3686850	3626256	3758191	4473409	3149567	3156218	2814244	3631709	3559135	3149567	3487896	3718909	4377905	1765119	1897234	3275546	3285430	3266975	3593209	3620229	3275546	3525614	3642646	4404783	1780693	1854271	3522044	3455899	4178151	3977240	3966971	3545129	3928653	3814725	4389204	1827022	1792475
16.2	3190035	3199146	3476993	3400257	3438202	3437412	3217664	3724879	3651244	3766639	4476866	3190035	3199146	2649034	3599174	3529045	3190035	3468908	3706500	4372568	1769735	1894343	3285804	3293348	3387269	3561306	3593644	3285804	3510669	3663950	4370409	1775557	1840809	3524508	3512627	3991050	3978320	3975355	3579988	3930394	3789747	4394314	1826621	1786281
16.4	3134790	3147974	3498908	3393270	3438202	3468648	3253091	3700821	3636469	3774773	4479210	3134790	3147974	2728907	3658806	3567954	3134790	3489533	3717330	4353815	1765487	1904295	3301820	3306938	3225294	3582179	3643525	3301820	3556268	3652884	4376857	1770729	1843833	3486165	3455899	4031681	3916585	3962283	3519500	3932943	3810083	4415427	1834591	1787697
16.6	3158925	3164478	3466800	3334883	3476993	3431353	3206216	3721268	3644399	3777114	4475339	3158925	3164478	2807143	3618984	3566512	3158925	3500622	3717535	4365053	1751066	1909255	3323935	3306938	3230294	3564042	3624909	3323935	3531064	3652552	4362865	1778065	1846167	3492930	3523031	4078866	3982215	3981477	3562083	3923768	3794199	4433550	1843616	1793610
16.8	3169018	3178316	3476993	3308152	3489423	3467694	3231293	3716186	3646851	3784643	4465410	3169018	3178316	2828698	3612468	3588538	3169018	3511423	3686850	4399488	1752766	1901187	3299974	3309278	3227269	3603207	3662693	3299974	3561411	3650521	4382654	1788265	1852110	3510602	3508151	3736597	3967698	3982433	3523701	3980095	3805728	4400718	1841422	1793632
17	3121799	3131310	3498908	3349519	3476929	3443433	3209219	3714761	3649237	3779196	4463746	3121799	3131310	2873067	3640605	3569079	3121799	3496597	3724879	4412711	1755502	1902649	3247132	3256349	3346176	3555610	3680865	3315241	3584834	3652812	4386697	1776440	1854864	3502900	3466800	4340630	3996615	3986107	3512076	3961203	3795269	4382141	1808862	1797344
17.2	3131805	3139321	3507363	3301981	3503675	3450848	3231504	3721028	3642404	3779082	4431276	3131805	3139321	2643277	3565939	3563235	3131805	3499608	3700821	4394682	1766499	1910956	3241397	3253683	3141008	3577268	3639581	3331159	3554829	3632126	4345544	1769640	1838466	3497086	3466800	3923109	3980087	3971294	3556983	3959261	3791331	4365798	1826161	1787591
17.4	3168744	3173365	3476993	3352713	3489423	3474810	3203434	3687614	3653059	3789045	4476485	3168744	3173365	2803361	3587695	3598408	3168744	3513959	3721268	4391799	1766771	1911497	3246150	3268818	3372311	3569160	3641279	3334348	3552341	3645525	4360852	1770675	1849487	3503844	3455899	3906891	3996603	3961869	3517388	3923768	3766639	4418715	1821808	1793260
17.6	3132233	3137389	3455899	3308570	3438202	3455899	3219488	3692413	3661671	3768716	4470728	3132233	3137389	2754874	3584249	3561023	3132233	3495802	3716186	4380195	1763872	1907326	3291997	3257531	3057521	3548426	3628674	3276326	3528779	3663771	4417974	1781449	1861871	3487866	3466800	3987521	3991861	3985134	3526032	3980095	3774773	4405653	1819200	1783193
17.8	3158259	3169040	3506256	3331327	3455899	3473794	3210378	3672084	3642831	3769991	4469214	3158259	3169040	2700084	3656393	3594922	3158259	3519504	3714761	4408445	1770436	1911053	3264380	3244464	3430084	3538094	3635153	3314724	3543126	3649292	4405016	1771192	1841806	3478814	3455899	4063529	3987063	3996551	3533039	3961203	3777114	4406640	1829773	1795514
18	3169868	3175108	3476993	3300384	3466800	3476993	3202613	3702715	3646954	3767531	4489656	3169868	3175108	2745588	3631595	3552851	3169868	3479920	3721028	4384879	1773228	1920026	3274539	3220706	3226386	3575816	3650226	3354686	3557105	3638087	4408457	1782384	1860078	3508338	3438202	3890588	3973916	3998867	3543394	3983618	3784643	4377688	1807275	1780019
18.2	3152661	3164779	3466800	3261150	3476993	3455899	3143697	3703203	3661774	3777377	4447785	3152661	3164779	2935084	3556412	3568186	3152661	3491412	3687614	4375141	1773866	1909766	3247132	3251049	3411513	3551901	3626231	3336740	3542007	3637794	4385622	1775833	1856938	3518004	3438202	4035924	3974906	3997451	3528052	3932943	3779196	4388482	1825555	1784040
18.4	3187791	3187279	3489828	3297777	3466800	3489423	3195875	3712575	3659846	3800735	4446848	3187791	3187279	2700210	3592422	3601723	3187791	3523603	3692413	4411850	1774481	1919031	3241397	3281270	3194958	3525572	3629911	3311268	3542480	3643725	4411881	1783803	1857477	3490671	3455899	3794454	3905029	3997525	3544184	3961203	3779082	4393297	1822731	1789472
18.6	3175607	3178735	3466800	3286534	3473794	3465449	3183903	3689119	3663627	3767647	4454792	3175607	3178735	2603781	3621460	3615324	3175607	3534579	3672084	4406356	1775349	1907775	3246150	3251356	3171008	3505084	3667249	3350617	3574330	3635515	4382982	1769063	1865887	3480827	3519003	4201176	3979633	4006579	3505333	3980095	3789045	4405373	1812738	1787675
18.8	3188948	3201794	3476993	3294832	3466800	3476929	3224426	3713714	3677581	3776163	4434161	3188948	3201794	2656302	3618466	3610243	3188948	3532764	3702715	4429190	1773871	1909839	3291997	3306885	3094622	3524974	3697730	3390465	3599081	3626316	4366640	1768798	1850604	3515777	3501765	4212521	3998202	4062862	3526401	3961203	3768716	4409921	1818876	1783765
19	3165290	3176321	3466800	3272808	3489423	3489063	3184798	3703315	3661740	3774351	4461488	3165290	3176321	2750882	3578388	3601424	3165290	3520712	3703203	4402424	1775332	1911734	3264380	3348552	3285840	3553516	3620477	3349740	3535847	3625465	4361098	1778173	1841486	3456852	3455899	4183067	3996603	4032940	3508302	3959261	3769991	4418672	1818919	1798311
19.2	3183088	3190113	3498908	3306562	3438202	3438202	3187487	3706076	3667687	3809934	4449927	3183088	3190113	2665126	3593313	3594412	3183088	3518557	3712575	4403442	1770876	1919670	3253698	3335533	3214958	3574247	3648888	3329205	3556669	3623056	4351014	1766173	1836214	3451610	3495440	3880462	3991861	4015011	3541431	3879486	3767531	4396524	1818405	1799117
19.4	3196471	3210171	3455899	3299317	3466800	3466800	3222153	3877453	3656416	3788242	4482574	3196471	3210171	2835084	3611390	3544862	3196471	3473431	3689119	4426263	1781852	1905055	3258788	3309062	3244076	3487801	3629040	3300845	3534286	3644114	4359727	1761676	1844173	3478036	3438202	4136555	3980087	4007596	3501279	3863077	3835622	4408394	1813968	1795318
19.6	3167630	3175678	3476929	3316031	3476993	3453565	3204800	3755531	3652523	3794360	4464944	3167630	3175678	2865336	3602589	3532241	3167630	3470962	3713714	4428326	1781342	1919363	3237873	3306562	3312479	3559561	3628614	3355808	3550375	3625335	4379373	1771916	1855361	3464234	3474810	4178151	3996603	4097704	3548991	3963517	4030593	4686736	1841422	1787697
19.8	3153706	3167636	3476993	3305814	3466800	3491868	3173721	3730272	3638121	3791331	4470208	3153706	3167636	2636513	3610133	3570443	3153706	3491637	3703315	4433173	1784672	1894739	3311277	3299317	3182731	3541180	3632801	3384734	3539834	3624768	4379654	1765121	1860482	3488504	3455899	3991050	3991861	4077323	3533158	3928653	3892584	4525627	1860155	1817639
20	3140349	3150748	3498908	3306885	3476929	3476993	3210536	3689060	3648398	3799355	4442845	3140349	3150748	2852983	3584428	3535735	3140349	3470921	3706076	4426900	1768823	1908736	3251011	3316031	4576975	3559739	4319696	4376996	4544050	3633671	5403296	1786777	2051107	3481725	3473794	4414454	3982215	4033329	3558813	3906454	3877378	4470109	1844588	1802153
20.2	3220062	3232355	3466800	3281155	3438202	3506017	3168945	3697027	3654482	3792074	4437103	3220062	3232355	3266807	3958921	3642617	3220062	3566384	3877453	4683307	1875865	1997920	3298122	3305814	4885420	4257560	4738570	4345556	4541691	3640464	5401721	1972238	2357887	3520355	3476993	4475840	3935365	4073968	3531519	3942451	3865705	4432052	1832576	1787879
20.4	3214380	3217622	3455899	3257904	3466800	3476993	3244074	3714165	3631850	3806653	4414199	3214380	3217622	3095084	3789069	3918789	3814380	3945241	3955531	4811679	2032991	2141916	3275546	3306885	4912437	4534693	4916194	4384412	4542194	4619880	5693160	2178207	2251690	3499852	3493918	4797563	3963537	4076985	4535372	3938937	3843183	4983245	1838865	1791058
20.6	3370302	3169103	3466800	3238711	3438202	3498908	3201198	3706924	3667688	3814725	4428962	3370302	3169103	3092731	3776950	3906755	3755554	3939976	3930272	4861977	2004249	2092918	3285804	3313296	4956302	4265697	5202762	4209266	4614087	4830471	5652134	2167169	2345304	3711192	3689033	4864286	4213528	4072285	4509999	3930394	4152297	5308348	2037551	1810721
20.8	3286154	3190647	3476993	3341708	3476993	3466800	3212046	3703246	3682463	3789747	4448070	3286154	3190647	2988824	3675635	3987090	3478141	3920633	3889060	4641026	1890542	2015451	3301820	3354063	4794160	4185782	5246367	4370547	4570675	4684260	5468750	2021762	2286849	3730886	3705749	4794202	4327568	4983061	4522078	4932943	4843667	5418441	2234474	1895901
21	3278097	3214120	3489423	3351865	3438202	3476993	3197921	3708127	3681302	3810083	4409323	3278097	3214120	2889328	3601632	3974277	3304580	3800705	3797027	4541486	1790503	1911151	3323935	3386006	4798655	4246380	5132812	4367200	4540069	4645879	5544171	2082583	2277713	3655948	3735668	4891176	4497430	5653203	4526693	5223768	4831916	5700789	2325327	2003858
21.2	3245062	3173130	3466800	3324709	3438202	3498908	3258354	3710182	3679542	3794199	4456028	3245062	3173130	2858067	3641368	3765716	3162181	3696893	3714165	4422387	1780954	1888271	3594673	3348552	4827815	4060804	5183174	4371673	4302350	4644084	5502856	1980016	2074178	3541557	3754535	5071134	5659703	5934762	4529792	6080095	4968469	5737519	2235121	2199053
21.4	3191259	3196818	3499290	3297448	3489423	3507363	3220962	3710490	3658142	3805728	4469919	3191259	3196818	2965210	3555265	3555385	3191259	3576493	3706924	4412282	1779881	1894173	3357939	3335533	4711807	3770483	5005002	4357939	4321522	4636981	5425152	1885143	1964692	3538964	3743873	5232983	5636822	5975569	4541557	6028945	4854410	5627152	2334960	2092756
21.6	3194430	3197379	3466800	3333031	3466800	3476993	3256568	3706198	3672701	3795269	4429449	3194430	3197379	2831471	3587726	3553374	3194430	3479113	3703246	4418412	1769788	1898000	3345864	3309062	4649790	3639546	5085743	4145864	4208214	4322427	5422802	1772396	1848929	3536504	3712068	5221050	5317234	5933408	4538964	6083618	4868130	5617035	2352089	2190677
21.8	3200072	3208858	3466800	3324055	3476993	3455899	3232618	3704976	3658110	3791331	4405702	3200072	3208858	2805126	3564435	3559832	3200072	3478138	3708127	4406044	1784070	1903297	3312562	3352547	4536386	3533682	5057925	4112562	4080809	4337049	5015762	1781403	1848089	3522826	3740177	5285084	5312211	5893792	4536504	6051416	4979719	5499290	2234087	2195303
22	3151957	3155141	3455899	3299661	3465449	3506256	3246200	3706517	3653416	3816540	4432426	3151957	3155141	2864748	3624918	3555988	3151957	3488810	3710182	4412085	1787028	1912759	3338191	3381090	4555420	3579378	4972420	4038191	3898659	4135565	4896673	1776272	1841696	3557407	3728366	5389244	5207193	5833078	4522826	6082859	4958086	5407250	2330358	2293107
22.2	3166063	3175897	3466800	3305449	3491868	3476993	3198493	3715320	3671413	3806250	4415916	3166063	3175897	2722689	3566643	3569161	3166063	3491274	3710490	4427621	1783077	1902434	3381165	3370183	4478571	3510545	4769215	4081165	3587726	4037583	4711618	1779670	1845322	3534599	3697779	5559328	5201622	5997218	4557407	6040217	4860496	5598714	2340488	2188645
22.4	3147377	3156045	3466800	3300682	3455899	3466800	3231771	3691110	3673559	3800631	4427262	3147377	3156045	2852353	3521328	3576970	3147377	3500208	3706198	4410659	1784815	1903074	3358826	3354664	4497143	3576122	4203544	3958826	3525517	3828199	4588173	1782238	1850991	3503788	3681420	5232101	5291390	5891220	4534599	6047302	4850230	5406865	2234339	2079601
22.6	3209561	3217880	3498908	3261150	3512627	3489828	3192098	3704464	3683659	3813364	4433302	3209561	3217880	2680588	3578081	3557209	3209561	3482270	3704976	4413691	1791909	1907834	3341319	3379525	4304706	3530524	3970004	3941319	3512108	3639955	4388771	1779915	1850334	3567877	3697540	7112521	5302678	5821456	4503788	6064926	4818131	5490611	2227221	2177238
22.8	3206379	3219160	3438202	3297777	3455899	3466800	3217942	3703008	3673204	3812001	4462014	3206379	3219160	2612395	3569023	3560028	3206379	3492336	3706517	4396547	1789032	1910038	3363543	3400953	4322269	3546520	3778711	3863543	3509462	3607870	4421576	1771439	1850820	3552624	3727520	7250210	5230441	5796254	4567877	5954865	4856361	5407117	2232998	2104609
23	3192147	3195324	3438202	3286534	3523031	3476993	3232181	3710030	3658194	3816369	4474734	3192147	3195324	2811008	3564662	3554401	3192147	3480910	3715320	4426408	1782292	1899143	3373817	3373587	4695714	3594011	3590863	3873817	3529642	3641697	4370426	1788614	1850214	3524356	3682390	7019706	5334175	5812593	4552624	5961203	4850703	5426873	2343204	2181793
23.2	3160078	3171798	3476993	3436185	3508151	3466800	3246819	3706494	3679346	3805763	4425099	3160078	3171798	2745042	3557961	3563900	3160078	3489476	3691110	4430415	1781352	1919748	3392785	3366762	3185378	3616436	3564974	3592785	3496148	3651294	4384764	1774277	1854618	3500833	3669583	6895630	5354976	5714300	4524356	5959261	4965580	5290849	2133976	2281622
23.4	3187044	3193409	3489423	3462494	3466800	3498908	3228800	3697018	3681166	3802490	4439716	3187044	3193409	2735672	3591195	3541787	3187044	3467532	3704464	4425256	1785009	1904909	3369616	3368048	3249454	3564022	3605678	3469616	3522374	3627050	4387624	1772085	1859428	3536679	3498908	6894874	5230307	5826258	4600833	5773266	4846287	5329210	2151136	2098461
23.6	3172448	3181710	3476929	3448993	3466800	3455899	3212902	3703120	3674122	3817036	4450872	3172448	3181710	3004790	3619346	3551685	3172448	3478828	3703008	4416786	1785276	1909349	3313707	3355918	3423445	3602549	3582653	3213707	3508961	3643264	4381752	1768204	1862928	3520485	3507363	6391093	5220876	5856808	4636679	5782859	4845384	5109771	2039685	2280928
23.8	3187838	3196935	3503675	3419699	3455899	3476929	3206829	3690078	3678469	3799725	4417004	3187838	3196935	2718698	3560845	3560178	3187838	3484302	3710030	4411843	1781812	1911811	3360455	3347230	3380084	3574793	3618506	3360455	3542850	3647594	4391675	1758119	1874010	3539129	3541458	6243445	5126018	5728541	4620485	5677352	4881308	4894099	1926473	2091671
24	3141832	3148665	3489423	3446364	3466800	3476993	3229008	3702458	3677913	3819123	4383088	3141832	3148665	2876681	3559877	3562655	3141832	3492264	3706494	4406971	1786378	1907660	3332898	3316996	3238445	3597889	3608976	3332898	3538586	3639556	4400806	1766082	1864458	3506489	3499290	6266093	5120273	5799546	4539129	5854362	4948206	4807295	1830899	2101667
24.2	3189785	3194833	3438202	3465502	3455899	3498908	3215503	3713688	3675898	3818948	4385204	3189785	3194833	2882059	3597254	3574038	3189785	3502318	3697018	4411182	1796618	1916705	3331142	3347163	3337731	3595804	3607857	3331142	3540151	3627783	4423243	1784794	1848893	3477113	3506256	6072941	5226411	5853319	4506489	5582859	4857504	4599929	1839299	2189834
24.4	3192525	3202108	3455899	3437230	3438202	3466800	3258441	3698347	3667917	3809882	4408089	3192525	3202108	2799244	3607510	3551253	3192525	3479272	3703120	4428056	1793652	1902825	3356020	3378611	3219160	3549513	3632879	3356020	3549007	3629730	4397964	1787288	1844147	3472624	3530040	5870546	5122375	5728178	4577113	5372947	4977813	4410172	1837702	2299778
24.6	3242608	3247236	3466800	3475088	3438202	3455899	3190068	3692508	3655641	3814896	4420521	3242608	3247236	2730840	3586663	3573794	3242608	3487819	3690078	4387286	1796739	1913073	3378961	3350369	3319832	3559816	3591133	3378961	3511975	3636777	4392797	1771338	1855440	3522044	3525552	5940126	5196474	5875400	4672624	5423276	4970906	4402568	1836765	2098165
24.8	3188930	3193774	3476993	3450051	3455899	3466800	3249108	3686556	3674541	3791331	4420550	3188930	3193774	2878824	3539915	3558587	3188930	3494209	3702458	4412839	1795749	1905847	3358863	3344216	3327563	3558861	3640117	3358863	3562595	3635539	4427611	1779070	1862567	3524508	3489828	5812479	5116172	5586339	4522044	5325926	4951596	4407032	1833362	1993028
25	3197904	3208556	3466800	3454104	3519003	3476993	3204784	3686755	3675112	3792074	4443463	3197904	3208556	2733655	3576376	3578979	3197904	3501116	3713688	4384652	1793175	1907258	3345621	3359182	3202017	3571250	3629409	3345621	3562432	3637817	4422660	1779877	1844337	3486165	3537348	5946050	5195719	5081931	4524508	5020342	4877170	4404996	1832825	1988185
25.2	3195789	3196995	3473794	3423388	3501765	3489423	3194811	3685116	3677855	3806653	4431880	3195789	3196995	2714160	3607379	3565731	3195789	3495991	3698347	4412605	1779940	1914618	3357289	3362058	3410672	3579404	3628434	3357289	3549674	3620002	4410007	1781526	1843528	3492930	3510778	5925042	5153151	4981811	4486165	5022751	4660095	4395073	1828108	1884738
25.4	3218056	3222459	3466800	3432200	3455899	3466800	3235514	3682763	3663147	3814725	4397118	3218056	3222459	2671807	3625352	3559858	3218056	3481318	3692508	4416240	1784685	1895421	3374769	3391216	3287395	3573704	3619146	3374769	3545958	3644884	4398961	1768030	1839605	3510602	3546744	5986597	5176931	4860876	4492930	4908992	4644983	4389291	1829959	1880250
25.6	3225064	3233051	3489423	3424371	3495440	3499290	3204784	3688847	3670508	3789747	4385263	3225064	3233051	2873907	3572833	3560829	3225064	3484233	3686556	4413918	1797612	1918788	3348135	3373277	3200924	3572409	3630716	3348135	3560409	3638492	4378758	1764562	1848339	3502900	3517773	5799328	5238629	4563573	4510602	4996831	4435654	4447767	1839882	1793287
25.8	3184823	3196920	3438202	3441617	3438202	3466800	3194811	3699252	3669205	3810083	4426834	3184823	3196920	2665378	3544424	3599179	3184823	3523480	3686755	4447102	1796806	1896979	3351109	3316679	3106639	3563557	3618460	3351109	3539839	3617118	4389114	1781656	1840611	3497086	3503930	5836849	5152039	4321090	4502900	4763745	4128955	4447753	1823801	1786762
26	3213165	3220342	3466800	3304284	3474810	3466800	3235514	3703769	3670015	3794199	4430785	3213165	3220342	2944916	3609037	3588152	3213165	3514698	3685116	4442372	1789854	1906863	3318680	3362116	3215588	3574201	3610178	3318680	3530669	3622880	4374440	1784003	1842356	3503844	3548120	5793487	5108316	4069372	4497086	4712367	3942367	4415089	1825997	1782692
26.2	3215999	3225316	3476993	3299348	3455899	3455899	3222339	3701942	3667055	3805728	4412338	3215999	3225316	2723866	3581236	3570902	3215999	3493048	3682763	4406925	1795250	1893214	3296534	3332299	3248740	3544641	3661520	3296534	3576658	3635684	4380539	1775930	1846908	3487866	3549388	5784328	5135765	4146820	4503844	4382863	3965772	4429250	1829303	1790752
26.4	3164431	3174760	3466800	3316906	4147706	3466800	3191913	3687695	3680391	3795269	4423259	3164431	3174760	2820714	3590424	3563245	3164431	3491264	3688847	4418891	1782961	1902779	3329394	3335869	3370924	3599889	3652746	3329394	3575974	3640093	4384748	1782231	1858067	3478814	3524348	5857143	5045746	4145405	4487866	4292610	3844790	4406503	1860273	1784538
26.6	3210609	3219772	3476929	3334155	4121314	3466800	3170451	3690025	3675676	3791331	4401236	3210609	3219772	2926345	3596083	3547589	3210609	3467087	3699252	4408246	1788834	1911158	3321050	3350352	3423277	3582387	3640525	3321050	3551965	3646078	4359550	1784393	1840334	3508338	3530138	5799328	4853941	4120595	4478814	4072931	3850244	4421694	1855927	1790408
26.8	3213909	3217664	3438202	3314826	4101938	3498908	3222558	3694729	3638287	3766639	4403119	3213909	3217664	2875966	3601170	3583280	3213909	3500848	3703769	4399108	1782177	1913707	3296842	3379859	3311050	3596984	3623144	3296842	3543899	3644051	4365899	1784809	1845853	3518004	3517014	5836849	4748157	4171755	4508338	4017264	3837589	4430307	1845410	1792998
27	3245062	3253091	3466800	3301644	4129257	3438202	3177934	3706906	3666234	3774773	4419618	3245062	3253091	3026849	3595645	3554856	3245062	3481647	3701942	4421497	1782264	1912614	3308347	3363764	3406093	3551749	3608703	3308347	3534498	3658231	4368077	1778307	1839585	3490671	3559188	5793487	4722128	4185087	4518004	4024366	3858845	4434239	1855227	1788462
27.2	3204698	3206216	3438202	3303295	4120019	3438202	3207672	3669377	3664495	3777114	4402106	3204698	3206216	2624790	3537194	3588642	3204698	3516316	3687695	4419061	1777402	1912861	3329598	3348635	3423614	3566602	3591604	3329598	3515031	3646254	4366547	1779702	1858530	3480827	3560229	5784328	4672382	4141255	4490671	3989043	3856572	4409031	1843239	1779743
27.4	3221829	3231293	3476993	3346390	4121389	3476993	3186339	3690618	3684059	3784643	4407858	3221829	3231293	2954454	3577939	3577625	3221829	3511967	3690025	4412786	1783348	1902887	3335660	3355016	3363109	3569097	3612095	3335660	3536819	3641615	4385989	1792710	1854058	3515777	3579160	5857143	4649848	4125134	4180827	3971968	3857993	4408192	1844509	1782203
27.6	3207014	3209219	3438202	3291884	4134394	3489423	3184057	3697312	3687636	3779196	4412941	3207014	3209219	2902605	3525816	3581940	3207014	3501949	3694729	4418149	1781090	1923777	3311752	3376842	3282227	3574049	3673856	3311752	3587738	3626256	4382752	1790564	1850947	3456852	3522449	5470546	4303019	4099649	4015777	3956023	3843202	4438250	1850886	1797046
27.8	3224262	3231504	3438202	3298931	4153855	3476929	3198304	3713111	3678157	3779082	4420163	3224262	3231504	2823907	3545044	3562135	3224262	3485202	3706906	4427081	1796108	1910872	3370275	3341708	3372395	3586566	3608921	3370275	3538875	3651244	4400020	1795101	1851884	3451610	3584070	5323866	4098827	4176783	3856852	4018513	3863002	4413191	1856164	1779525
28	3195290	3203434	3489423	3302523	4116045	3503675	3180596	3700766	3682786	4374488	4427158	3195290	3203434	2891513	3568661	3567858	3195290	3495007	3669377	4406233	1770950	1915234	3305315	3351865	3392605	3574237	3630920	3305315	3547489	3636469	4394308	1769294	1836997	3478036	3536053	5169622	3819737	4160425	3751610	4009268	3848254	4410611	1859397	1782215
28.2	3214236	3219488	3466800	3313275	4142716	3489423	3180670	3684516	3677272	4380964	4422950	3214236	3219488	2843025	3543398	3578565	3214236	3506921	3690618	4432473	1779741	1899519	3304844	3324709	3350630	3605779	3623492	3304844	3538984	3644399	4394370	1768681	1846815	3464234	3518237	4921849	3851265	4145229	3478036	4001091	3849303	4406971	1845765	1760236
28.4	3207146	3210378	3476993	3308195	4141894	3438202	3194281	3711256	3688281	4341415	4413620	3207146	3210378	2688529	3539585	3566331	3207146	3488155	3697312	4411761	1785211	1903701	3287085	3297448	3412899	3564653	3678929	3287085	3591104	3646851	4413814	1778334	1852822	3488504	3556616	4685084	3597958	4179536	3464234	4022279	3859943	4403673	1851967	1785050
28.6	3192755	3202613	3465449	3305420	4146867	3455899	3174996	3703917	3682909	4378848	4423827	3192755	3202613	2937353	3529464	3563597	3192755	3492680	3713111	4381328	1781664	1917191	3337699	3333031	3581933	3566966	3651616	3337699	3568912	3649237	4401478	1779187	1850800	3481725	3519204	4349370	3633967	4172308	3488504	4021678	3852113	4417068	1847097	1776979
28.8	3145874	3143697	3491868	3288227	4135985	3466800	3168142	3717825	3685610	4385370	4416075	3145874	3143697	2877563	3587172	3600291	3145874	3521406	3700766	4397144	1789053	1915173	3298191	3324055	3527227	3561668	3646507	3298191	3563589	3642404	4385210	1779819	1848128	3520355	3519358	4214958	3657985	4198103	3481725	4038959	3857682	4418564	1851239	1778172
29	3189335	3195875	3455899	3323893	4177415	3476993	3180507	3709010	3688191	4369348	4411850	3189335	3195875	2777101	3564575	3572544	3189335	3500216	3684516	4379990	1780268	1886409	3297622	3299661	3611555	3535391	3685873	3297622	3593691	3653059	4398109	1772754	1843423	3499852	3543812	4475798	3681190	4142149	3520355	3993526	3846860	4419044	1851837	1779419
29.2	3179185	3183903	3512627	3321525	4205620	3466800	3163387	3692500	3668530	4354489	4406356	3179185	3183903	2834286	3531311	3584341	3179185	3518316	3711256	4385324	1788165	1907558	3304623	3305449	3283445	3557136	3687375	3304623	3590934	3661671	4379753	1774940	1847541	3500553	3552032	4724706	3668395	4202234	3499852	4037243	3854042	4408177	1862051	1789133
29.4	3220460	3224426	3455899	3329574	4180023	3473794	3200004	3704944	3699019	4382246	4429190	3220460	3224426	2668319	3527015	3559142	3220460	3490174	3703917	4404613	1780246	1896871	3296645	3300682	3241345	3594839	3681054	3296645	3595901	3642831	4386286	1776956	1842409	3466916	3535817	4604748	3635564	4208028	3500553	4050084	3859194	4411396	1855319	1780158
29.6	3183791	3184798	3523031	3281543	4167452	3466800	3175501	3710330	3681703	4373810	4402424	3183791	3184798	2783529	3545454	3591956	3183791	3521358	3717825	4377135	1782697	1910937	3260291	3261150	3486807	3544819	3669259	3260291	3577934	3646954	4389474	1776254	1846071	3518895	3574417	4642017	3646737	4205810	3466916	4042352	3866945	4416959	1849014	1784142
29.8	3178665	3187487	3508151	3312349	4172090	3489423	3198203	3699838	3696151	4371506	4403442	3178665	3187487	2777605	3530333	3587350	3178665	3504434	3709010	4409370	1782034	1908176	3297833	3297777	3467479	3600543	3665298	3297833	3594138	3661774	4372987	1772977	1841740	3491326	3539227	4715462	3736976	4208316	3518895	4048313	3863416	4412603	1854202	1779914
30	3218806	3222153	3466800	3316126	4168858	3438202	3176564	3702664	3692165	4377422	4426263	3218806	3222153	2960252	3584233	3572483	3218806	3490958	3692500	4385256	1772529	1895016	3278811	3286534	3427353	3610758	3650675	3278811	3564313	3659846	4386487	1774912	1844783	3504118	3543576	4453193	3660072	4204369	3491326	4057460	3862404	4409029	1851069	1760035
30.2	3197473	3204800	3466800	3329095	4173004	3466800	3206725	3686526	3704951	4377230	4428326	3197473	3204800	2739622	3498911	3613498	3197473	3535637	3704944	4396850	1780139	1899259	3293087	3294832	3433487	3591282	3683127	3293087	3583399	3663627	4382221	1784639	1846178	3467124	3503675	4539160	3610680	4211586	3504118	4052509	3851297	4396310	1842423	1793021
30.4	3168744	3173721	3455899	3295779	4204009	3476993	3168165	3682982	3706781	4384044	4433173	3168744	3173721	3017521	3578745	3590112	3168744	3523963	3710330	4404731	1791255	1905606	3265938	3272808	3432185	3617406	3612684	3265938	3525769	3677581	4372824	1783499	1831847	3465092	3495619	4414370	3656267	4214002	3467124	4057932	3860335	4408535	1843092	1778487
30.6	3196993	3210536	3466800	3334883	4195989	3466800	3179952	3669677	3700475	4374161	4426900	3196993	3210536	2918403	3574892	3558556	3196993	3491714	3699838	4430572	1797112	1912316	3309392	3306562	3333361	3568364	3642952	3309392	3544590	3661740	4351899	1796239	1851355	3471750	3526364	4447605	3661436	4228330	3465092	4054716	3865409	4408705	1847017	1782619
30.8	3164546	3168945	3455899	3308152	4204246	3476929	3198022	3667285	3688827	4377191	4461977	3164546	3168945	2790672	3564915	3538607	3164546	3471116	3686334	4393792	1777753	1914540	3291483	3299317	3476471	3636433	3608688	3291483	3523122	3667687	4356210	1782586	1850715	3470593	3528452	4677815	3660143	4210152	3471750	4041623	3876007	4409238	1845953	1782085
31	3233219	3244074	3438202	3349519	4186000	3438202	3202173	3649801	3712176	4368748	4441026	3233219	3244074	2827101	3572174	3575176	3233219	3502890	3690634	4384177	1778517	1902200	3308915	3316031	3415840	3638813	3627285	3308915	3541805	3656416	4358430	1779738	1838964	3483319	3501098	4662857	3652726	4217540	3470593	4055302	3880272	4392137	1849952	1777890
31.2	3193929	3201198	3438202	3301981	4154658	3466800	3143739	3663586	3699232	4364238	4441486	3193929	3201198	2901723	3560635	3565597	3193929	3491723	3675265	4393513	1791511	1898921	3302360	3305814	3501093	3647712	3650366	3302360	3555620	3652523	4366084	1791134	1835050	3531723	3548333	4176933	3671508	4236637	3483319	4075743	3867974	4382596	1855543	1771113
31.4	3203654	3212046	3455899	3352713	4189436	3438202	3160464	3674178	3709760	4362889	4422387	3203654	3212046	2765546	3599546	3602221	3203654	3522766	3696407	4416121	1773126	1905109	3297972	3306885	3484370	3632720	3656331	3297972	3564232	3638121	4387197	1799424	1833591	3565471	3551074	4399580	3633905	4250026	3531723	4085511	3850422	4397004	1839493	1780063
31.6	3189808	3197921	3519003	3308570	4183526	3476993	3175491	3661214	3694118	4370407	4412282	3189808	3197921	2826807	3566667	3601847	3189808	3530866	3697463	4415332	1785538	1894252	3282453	3281155	3529832	3667565	3653942	3282453	3564265	3648398	4422833	1793807	1828014	3558382	3596721	4459328	3669120	4361835	3565471	4182597	3851297	4411396	1854202	1789133
31.8	3248712	3258354	3501765	3331327	4166597	3438202	3187872	3666333	3683660	4371809	4418412	3248712	3258354	2666093	3555473	3577254	3248712	3505697	3700990	4424244	1774719	1896975	3260077	3257904	3628824	3577884	3657818	3260077	3569099	3654482	4375953	1775916	1843339	3556842	3558974	4575084	3609240	4289752	3558382	4127237	3945947	4480205	1872062	1797892
32	3213330	3220962	3455899	3300384	4197050	3438202	3179574	3659976	3692020	4366385	4406044	3213330	3220962	2952101	3570003	3581261	3213330	3502680	3642648	4404614	1787669	1896648	3237547	3238711	3360672	3597030	3633837	3237547	3549818	3631850	4372066	1783423	1840103	3533936	3556672	4566260	3618984	4279335	3556842	4103307	3901566	4422434	1849611	1789227
32.2	3248413	3256568	3495440	3322556	4200836	3489423	3199856	3678326	3661158	4377360	4412085	3248413	3256568	2860168	3635272	3684187	3248413	3597425	3697312	4419061	1780139	1899259	3268971	3266852	3347689	3640703	3692096	3268971	3595397	3667688	4366089	1783213	1843252	3499104	3574670	4536176	3644915	4278857	3533936	4112857	3876120	4422704	1851414	1786833
32.4	3220658	3232618	3438202	3295864	4193766	3466800	3180332	3678584	3698467	4409043	4427621	3220658	3232618	3059580	3603632	3641587	3220658	3565543	3741974	4475132	1783148	1905606	3301555	3304763	3433781	3655738	3648805	3301555	3556735	3682463	4380478	1770746	1848860	3502463	3552986	4393571	3634908	4257821	3499104	4099215	3871082	4419104	1848450	1781657
32.6	3241211	3246200	3474810	3347294	4208644	3476993	3205969	3680116	3693507	4388665	4410659	3241211	3246200	2925042	3618506	3637173	3241211	3555903	3714757	4438063	1800900	1935974	3300700	3304284	3464958	3692922	3747105	3300700	3659431	3646851	4386487	1852693	1926833	3499804	3558008	4553655	3598520	4275782	3502463	4118835	3865711	4376903	1854703	1778323
32.8	3192776	3198493	3455899	3340729	4195284	3465449	3180613	3675835	3697776	4381759	4413691	3192776	3198493	2885924	3607572	3596781	3192776	3523925	3699158	4403803	1781098	1917920	3289635	3299348	3286765	3643747	3687492	3289635	3590938	3730594	4449641	1806404	1859285	3539883	3530698	4377815	3605019	4248023	3499804	4081217	3876469	4399075	1826279	1764345
33	3226027	3231771	3437023	3281155	4219947	3491868	3157898	3671340	3673341	4386711	4396547	3226027	3231771	2790798	3575702	3630011	3226027	3545883	3688105	4410190	1763820	1909510	3318692	3316906	3659244	3656055	3654252	3318692	3571352	3681302	4408014	1790211	1859158	3490462	3602234	4469412	3608017	4227243	3539883	4063552	3867999	4395756	1849794	1763100
33.2	3190605	3192098	3463091	3257904	4176255	3455899	3156877	3685598	3705197	4358923	4426408	3190605	3192098	2890252	3547053	3598783	3190605	3523799	3705633	4403314	1783148	1893116	3339030	3334155	3423193	3642987	3664017	3339030	3575469	3679542	4393157	1791506	1862622	3500489	3578456	4545084	3586798	4263729	3490462	4098947	3877513	4409898	1855191	1766134
33.4	3209666	3217942	3447667	3238711	4201396	3512627	3182378	3667278	3697031	4357231	4430415	3209666	3217942	2919832	3560500	3574577	3209666	3494049	3677313	4407996	1764503	1887507	3314552	3314826	3419076	3648344	3628808	3314552	3545049	3658142	4354801	1770982	1854897	3469901	3574908	4595840	3625731	4282053	3500489	4118297	3869281	4385417	1850165	1770047
33.6	3229842	3232181	3449519	3266852	4189256	3455899	3151552	3672670	3699793	4341744	4425256	3229842	3232181	2738571	3610222	3617384	3229842	3540471	3683540	4382012	1764969	1894032	3304323	3301644	3412437	3699281	3657740	3304323	3563443	3672701	4395911	1781453	1864437	3490078	3573840	4418614	3643026	4267364	3469901	4099662	3862883	4425553	1852897	1771170
33.8	3244361	3246819	3429073	3304763	4181474	3523031	3190887	3662014	3707827	4344024	4416786	3244361	3246819	2815420	3625589	3606916	3244361	3529187	3698323	4415484	1764180	1886584	3306237	3303295	3663571	3726007	3638103	3306237	3546614	3658110	4416251	1776544	1861809	3442275	3603562	4341219	3649693	4313572	3490078	4147706	3860411	4434645	1853153	1761234
34	3226152	3228800	3479244	3304284	4182334	3508151	3194504	3653054	3695501	4370667	4411843	3226152	3228800	2968781	3565263	3627386	3226152	3533525	3673154	4400510	1756369	1869488	3348679	3346390	3473109	3695500	3639501	3348679	3556706	3653416	4392899	1779658	1860016	3494680	3595434	4441134	3652847	4286135	3442275	4121314	3855280	4438542	1846933	1786692
34.2	3203970	3212902	3465922	3299348	4153429	3466800	3190758	3672075	3667400	4348802	4406971	3203970	3212902	2906050	3567768	3591931	3203970	3512343	3684088	4396398	1765016	1877356	3288523	3291884	3414748	3645574	3655143	3288523	3574731	3671413	4399806	1765401	1850435	3464283	3543294	4384622	3632476	4263799	3494680	4101938	3854259	4428931	1861870	1772106
34.4	3203079	3206829	3462827	3316906	4165984	3466800	3175204	3661778	3672757	4388339	4411182	3203079	3206829	2844118	3586122	3606249	3203079	3524465	3679935	4369809	1762566	1884966	3293630	3298931	3391807	3624884	3653717	3293630	3557234	3673559	4397549	1776765	1847270	3472415	3530537	4442395	3641797	4290496	3464283	4129257	3827468	4391529	1863995	1766488
34.6	3223358	3229008	3448014	3334155	4150809	3455899	3138516	3653650	3658294	4421899	4428056	3223358	3229008	2929580	3611120	3634370	3223358	3548278	3700837	4379435	1757698	1877949	3299968	3302523	3526302	3680728	3628499	3299968	3536329	3683659	4378318	1777931	1838584	3444959	3564714	4609748	3662249	4283059	3472415	4120019	3839702	4405177	1865368	1776096
34.8	3209190	3215503	3452422	3314826	4177352	3466800	3168526	3681289	3685542	4381511	4387286	3209190	3215503	3019328	3606159	3602083	3209190	3524361	3678583	4341920	1767433	1880773	3314489	3313275	3571807	3649300	3629484	3314489	3546048	3673204	4365269	1770834	1848711	3477087	3517264	4285000	3656496	4286788	3444959	4121389	3845340	4404752	1851736	1782673
35	3250518	3258441	3426664	3301644	4188247	3455899	3185172	3658912	3696773	4402579	4412839	3250518	3258441	2951807	3601460	3618015	3250518	3538241	3678027	4388626	1751169	1886329	3310427	3308195	3467311	3648948	3633408	3310427	3549197	3658194	4369035	1780607	1847007	3484547	3542142	4650546	3598183	4306303	3477087	4134394	3860786	4416311	1840371	1754467
35.2	3188628	3190068	3456738	3303295	4157466	3438202	3162280	3662165	3706971	4396079	4384652	3188628	3190068	2749244	3612194	3606831	3188628	3523444	3679464	4406021	1758653	1889725	3310763	3305420	3374496	3679713	3679037	3310763	3592627	3679346	4386124	1777193	1857605	3477283	3539267	4468992	3671677	4322311	3484547	4153855	3867048	4395806	1847805	1771254
35.4	3242912	3249108	3443805	3346390	4166123	3438202	3186999	3656489	3700507	4404792	4412605	3242912	3249108	2872479	3596402	3604085	3242912	3518239	3683272	4399958	1758198	1889046	3279945	3288227	3522563	3696170	3656299	3279945	3580862	3681166	4378883	1779238	1857221	3475673	3567763	4249832	3662498	4286189	3477283	4116045	3865696	4384929	1853784	1767078
35.6	3254045	3253061	3464352	3291884	4163748	3455899	3181201	3671166	3689173	4395595	4416240	3254045	3253061	3028487	3559409	3646940	3254045	3551400	3670016	4391472	1762424	1871895	3322895	3323893	3348277	3658192	3652035	3322895	3556682	3674122	4382732	1792952	1838566	3492609	3512627	4334496	3641484	4317517	3475673	4142716	3865449	4390772	1848818	1776395
35.9	3255036	3260141	3488708	3298931	4168407	3519003	3177434	3676274	3724969	4410810	4413918	3255036	3260141	2888698	3589049	3629188	3255036	3543427	3697088	4396198	1756459	1863457	3323829	3321525	3558067	3617886	3674648	3323829	3586781	3678469	4406340	1782943	1855582	3498277	3554577	4331975	3615534	4304513	3492609	4141894	3854625	4394934	1862257	1768370
36	3236717	3240617	3438498	3347294	4208725	3501765	3159696	3671235	3719225	4392509	4447102	3236717	3240617	2909538	3572418	3626531	3236717	3549688	3682608	4375383	1767932	1872850	3328745	3329574	3335798	3635020	3646938	3328745	3564507	3677913	4414509	1793102	1854332	3460070	3523031	4454580	3666185	4318149	3498277	4146867	3878473	4411782	1850431	1762934
36.2	3234935	3237371	3446097	3340729	4225585	3455899	3185553	3686360	3731816	4373169	4442372	3234935	3237371	2990504	3594558	3578883	3234935	3502856	3694535	4389559	1753901	1885665	3275659	3281543	3909748	3654638	3642638	3275659	3554949	3675898	4423936	1772302	1845948	3503376	3508151	4313740	3657812	4305952	3460070	4135985	3853965	4419566	1854709	1763820
36.4	3219278	3223595	3448551	3281155	4204538	3495440	3153946	3685182	3732949	4398810	4406925	3219278	3223595	3081008	3625044	3602155	3219278	3523295	3672150	4377698	1767085	1878075	3320625	3312349	3323109	3652392	3622677	3646938	3537687	3667917	4414532	1775712	1838381	3524699	3548954	4368529	3652128	4349819	3503376	4177415	3870278	4426784	1836083	1768280
36.6	3229024	3237582	3436185	3257904	4215986	3438202	3180233	3666310	3715916	4414640	4418891	3229024	3237582	2985546	3553340	3593605	3229024	3515440	3675327	4413886	1765904	1869464	3317112	3316126	3707857	3574793	3650085	3642638	3558576	3655641	4419441	1772095	1844517	3493508	3515008	4673698	3634110	4384697	3524699	4205620	3878668	4438209	1859353	1764951
36.8	3208228	3220598	3462494	3238711	3476993	3474810	3266852	3670345	3716752	4382002	4408246	3208228	3220598	3050672	3550948	3606504	3208228	3531774	3676256	4398509	1750592	1876083	3327594	3329095	3508109	3597889	3640464	3622677	3555424	3674541	4416270	1778180	1851825	3487599	3522371	4479958	3642630	4346174	3493508	4180023	3873086	4444776	1853578	1777330
37	3248546	3256036	3448993	3266852	3489423	3455899	3304763	3691098	3721189	4396619	4399108	3248546	3256036	3150126	3585780	3594375	3248546	3513548	3666945	4365829	1765899	1876750	3295651	3295779	3736807	3595804	3632986	3650085	3546650	3675112	4401179	1776500	1845820	3518405	3529070	4568025	3662954	4353499	3487599	4167452	3884904	4434637	1861658	1768065
37.2	3220010	3226104	3419699	3305814	3476929	3297777	3304284	3678974	3720699	4393264	4421497	3220010	3226104	2746050	3568794	3587954	3220010	3504691	3685623	4384176	1772951	1850587	3331319	3334883	3548824	3549513	3631995	3640464	3551851	3677855	4397798	1786592	1861291	3485703	3534666	4421765	3640341	4357588	3518405	4172090	3888228	4444083	1853670	1776124
37.4	3212882	3219597	3446364	3306885	3503675	3286534	3299348	3679898	3731848	4388898	4419061	3212882	3219597	3023614	3602216	3555600	3212882	3471911	3675880	4354487	1750788	1858345	3309436	3308152	3480378	3559816	3660168	3632986	3576992	3663147	4403925	1767482	1866546	3496777	3523600	4716933	3667426	4356328	3485703	4168858	3888415	4434904	1862809	1765333
37.6	3193898	3195471	3465502	3281155	3489423	3294832	3316906	3670183	3719389	4346383	4412786	3193898	3195471	2903950	3608762	3600974	3193898	3519340	3673923	4375109	1762702	1869569	3346538	3349519	3525084	3558861	3646611	3631995	3557835	3670508	4419579	1766974	1845577	3495729	3535086	4586429	3651972	4337748	3496777	4173004	3875119	4403769	1866055	1782567
37.8	3250859	3256926	3437230	3257904	3438202	3272808	3334155	3681505	3736987	4376026	4418149	3250859	3256926	3028235	3610441	3617832	3250859	3527398	3670759	4367469	1762793	1868589	3302078	3301981	3532185	3571250	3676560	3660168	3591635	3669205	4403251	1771786	1831036	3519292	3502354	4542773	3688178	4382401	3495729	4204009	3868364	4444749	1860352	1775811
38	3273921	3274726	3475088	3238711	3455899	3306562	3314826	3664547	3714800	4352754	4427081	3273921	3274726	2941513	3593495	3598373	3273921	3523484	3685993	4378162	1763038	1868506	3350599	3352713	3586513	3579404	3684610	3646611	3586399	3670015	4375317	1759326	1831364	3461053	3519003	4378193	3664957	4387161	3519292	4195989	3863125	4382785	1869247	1764844
38.2	3256218	3261176	3450051	3341708	3466800	3299317	3301644	3682979	3710435	4371790	4406233	3256218	3261176	2920252	3540569	3591824	3256218	3512910	3694256	4373903	1755917	1871830	3306797	3308570	3634538	3573704	3716774	3676560	3609325	3667055	4394965	1778670	1843546	3530657	3501765	4697269	3657987	4390890	3461053	4204246	3867297	4391826	1868068	1773734
38.4	3234432	3244577	3454104	3351865	3476993	3316031	3303295	3671615	3719345	4391603	4432473	3234432	3244577	2830546	3561445	3617207	3234432	3530387	3676438	4354163	1752395	1869457	3329546	3331327	3673277	3572409	3691610	3329546	3599756	3680391	4386705	1782189	1842457	3534498	3532798	4411176	3670558	4367701	3530657	4186000	3864582	4403905	1856366	1776310
38.6	3247491	3249855	3423388	3324709	3466800	3305814	3346390	3671830	3711861	4383695	4411761	3247491	3249855	2787353	3546817	3592953	3247491	3516018	3673197	4357764	1765666	1867199	3301725	3300384	3743698	3563557	3686728	3301725	3590340	3675676	4374962	1791129	1834931	3493223	3495440	4518025	3688670	4343118	3534498	4154658	3870086	4411530	1859797	1779225
39	3262097	3266925	3432200	3297448	3473794	3306885	3291884	3672743	3715606	4403540	4381328	3262097	3266925	2956933	3544267	3595408	3262097	3520307	3660433	4380169	1765423	1872167	3316768	3322556	3553824	3574201	3735606	3316768	3628366	3638287	4404304	1792241	1822939	3523556	3540722	4281093	3621139	4368344	3493223	4189436	3879619	4401904	1879053	1767946
39.2	3262866	3263943	3424371	3333031	3466800	3281155	3298931	3662065	3693084	4387749	4397144	3262866	3263943	2952647	3535184	3607963	3262866	3529248	3676172	4365894	1758783	1881396	3297665	3295864	3672269	3640703	3734603	3297665	3635802	3666234	4387859	1775669	1829565	3524280	3526441	4374496	3686880	4354946	3523556	4183526	3862440	4423983	1878165	1771574
39.4	3259248	3268719	3441617	3324055	3489423	3257904	3302523	3663058	3720386	4382072	4379990	3259248	3268719	2885798	3613115	3534343	3259248	3467714	3674766	4359079	1770107	1886590	3351476	3347294	3670966	3655738	3732333	3351476	3625168	3664495	4397286	1781857	1827154	3493138	3553998	4621597	3676479	4344045	3524280	4166597	3862465	4388877	1881793	1774096
39.6	3273185	3272621	3383933	3299661	3438202	3238711	3313275	3678062	3717330	4396884	4385324	3273185	3272621	3062101	3569787	3575084	3273185	3496942	3682493	4362111	1758477	1875588	3343131	3340729	3775042	3692922	3690192	3343131	3594270	3684059	4414160	1793145	1835686	3518718	3521471	4654706	3693603	4378371	3493138	4197050	3855188	4384249	1865510	1773946
39.8	3281899	3284293	3403656	3305449	3466800	3266852	3308195	3653844	3719223	4388254	4404613	3281899	3284293	2981260	3589148	3544914	3281899	3471911	3684322	4354555	1779664	1878118	3345621	3353184	3809622	3643747	3739120	3345621	3648032	3687636	4402722	1781635	1836873	3527061	3525781	4462689	3711105	4382584	3518718	4200836	3883713	4408917	1861172	1752942
40	3272510	3274875	3406898	3238711	3476993	3304763	3305420	3636903	3720116	4393323	4377135	3272510	3274875	2996429	3561754	3605135	3272510	3516131	3671405	4343605	1764112	1881281	3500833	3299940	4516176	3635020	3646938	3646938	3551851	3656416	4401179	1772302	1848860	3556968	3508518	4516176	3661351	4368396	3527061	4193766	3860950	4425215	1861585	1762765
40.2	3281170	3283191	3453340	3266852	3466800	3304284	3288227	3645596	3719320	4345863	4409370	3281170	3283191	2866975	3543111	3594172	3281170	3514545	3673729	4347880	1784356	1884511	3536679	3354116	4639454	3654638	3642638	3642638	3576992	3652523	4397798	1775712	1926833	3497009	3512370	4639454	3708405	4391554	3556968	4208644	3855717	4426259	1872343	1758669
40.4	3277678	3279199	3443080	3305814	3476929	3299348	3323893	3662990	3708950	4361367	4385256	3277678	3279199	2938445	3600886	3581136	3277678	3516486	3679842	4357990	1766378	1877554	3520485	3331517	4422143	3652392	3622677	3622677	3557835	3638121	4403925	1772095	1859285	3505621	3515120	4422143	3663169	4378091	3497009	4195284	3844678	4446705	1870221	1765557
40.6	3286833	3290804	3414973	3306885	3438202	3316906	3321525	3671797	3731970	4377643	4396850	3286833	3290804	2838025	3553950	3593827	3286833	3507578	3694119	4351012	1769155	1883358	3539129	3354526	4291723	3574793	3650085	3650085	3591635	3648398	4419579	1778180	1859158	3509834	3525532	4291723	3662949	4395789	3505621	4219947	3855691	4422075	1874368	1766218
40.8	3294195	3288961	3419699	3281155	3466800	3334155	3329574	3658350	3711667	4409676	4404731	3294195	3288961	2916681	3518202	3580792	3294195	3501765	3689625	4338507	1771147	1876712	3506489	3337520	4549664	3597889	3640464	3640464	3586399	3654482	4403251	1791506	1843546	3502025	3537854	4549664	3710852	4346530	3509834	4176255	3866210	4416088	1867078	1763246
41	3233995	3234359	3446364	3257904	3438202	3314826	3281543	3650543	3717260	4382308	4430572	3233995	3234359	3070546	3568019	3564406	3233995	3483202	3691496	4340906	1797523	1882912	3477113	3344138	4649790	3595804	3632986	3632986	3609325	3631850	4403925	1770982	1842457	3507518	3537910	4649790	3689858	4380087	3502025	4201396	3880547	4417606	1867207	1773718
41.2	3254615	3260211	3465502	3238711	3476993	3301644	3312349	3657295	3695818	4386784	4393792	3254615	3260211	3046008	3576460	3564631	3254615	3500763	3688447	4352111	1777091	1868617	3472624	3397867	4325294	3549513	3631995	3631995	3599756	3667688	4419579	1781453	1834931	3499852	3529008	4325294	3681947	4370537	3507518	4189256	3858868	4430405	1863486	1747097
41.4	3245865	3252163	3437230	3341708	3438202	3303295	3316126	3643435	3683401	4391096	4384177	3245865	3252163	2827857	3568878	3565152	3245865	3482611	3690503	4386731	1770913	1869749	3522044	3334695	4541597	3559816	3660168	3660168	3590340	3682463	4403251	1776544	1822939	3500553	3514732	4541597	3700065	4348279	3534949	4181474	3854922	4405438	1857700	1756283
41.6	3326049	3321833	3475088	3351865	3438202	3346390	3329095	3656527	3716879	4378763	4393513	3326049	3321833	2880588	3541214	3576999	3326049	3494362	3691474	4385158	1764678	1878463	3524508	3339961	4412059	3558861	3646611	3646611	3628366	3646851	4375317	1779658	1851825	3466916	3556268	4412059	3691361	4355666	3533989	4182334	3874681	4432590	1868325	1759939
41.8	3237141	3241311	3450051	3298931	3489423	3291884	3298931	3673816	3734199	4409319	4416121	3237141	3241311	2936597	3565746	3567502	3237141	3485956	3702664	4370331	1775520	1874357	3486165	3345103	4396471	3571250	3676560	3676560	3635802	3730594	4394965	1765401	1845820	3518895	3528332	4396471	3723506	4319233	3533567	4153429	3864567	4425422	1877421	1757819

## Sheet: Fig.2C and Fig.2D
21G11LexA,LexAopGCaMP6.0m response to Air, 0.5% CO2, 1% CO2 and 2% CO2
Time	Air					0.5%					0.01					0.02
0.2	4131091	2946167	3751511	5633528	2906167	3428277	3621494	3054499	3776892	5278584	3674630	3818795	2922803	3245981	5137165	3700039	3252282	2734225	3176990	5117895
0.4	3939787	2754252	3592827	5218428	2704252	3312182	3479295	2871437	3541449	4872570	3544135	3674129	2785033	3081166	4781494	3560256	3078032	2536956	2987961	4694479
0.6	3841068	2724767	3500762	5103734	2720767	3256273	3448575	2825565	3445664	4713343	3471261	3577140	2686515	2999155	4618096	3510658	3046790	2502464	2936807	4566270
0.8	3809586	2654559	3525609	4954722	2754559	3241968	3394883	2781071	3418276	4627580	3454770	3542965	2686502	2954919	4521755	3489785	3024460	2457328	2894876	4462440
1	3784387	2627950	3464750	4950288	2627950	3238682	3411710	2753232	3369917	4599717	3413063	3546129	2600012	2922993	4472455	3464078	2972611	2451808	2856552	4473318
1.2	3724810	2673556	3482276	4875151	2673556	3221687	3389208	2726461	3368599	4555649	3411591	3550872	2646968	2924648	4435153	3477374	2966568	2421540	2870701	4414608
1.4	3721125	2581984	3426940	4916667	2581984	3205302	3377799	2692461	3329919	4554640	3370675	3515012	2600894	2886510	4471950	3435934	2966928	2433719	2851062	4390015
1.6	3709450	2598479	3436095	4906053	2598479	3170353	3369623	2712040	3307474	4522282	3388236	3555816	2599853	2901996	4412917	3435489	2984835	2446716	2834098	4334362
1.8	3705038	2585760	3429403	4902603	2585760	3177430	3347737	2687120	3303183	4504384	3382082	3517521	2597907	2890798	4444252	3467892	2969600	2420150	2836050	4358309
2	3698598	2625616	3430001	4911353	2515065	3181803	3341185	2706274	3284145	4484673	3375375	3523297	2577378	2895466	4422177	3414781	2971514	2400807	2836579	4328843
2.2	3665914	2553993	3411692	4853080	2553993	3160169	3331347	2669478	3300255	4520461	3379894	3521188	2575178	2864804	4415423	3383440	2986731	2401252	2820154	4324947
2.4	3687177	2582460	3425938	4885940	2556185	3143726	3332367	2678001	3294084	4476019	3349401	3490080	2611600	2880770	4405543	3415977	2974221	2373584	2830647	4346489
2.6	3695277	2586986	3431419	4883235	2488049	3137228	3342715	2658140	3254922	4463748	3350775	3478114	2580851	2880846	4394236	3435549	2967777	2409215	2804495	4337264
2.8	3707106	2568422	3408050	4870258	2525089	3145912	3264664	2705153	3261151	4507331	3346680	3515131	2549493	2898134	4406950	3405688	2958129	2398182	2819382	4327912
3	3678937	2552048	3401504	4794050	2500479	3170039	3302094	2639385	3258174	4517505	3316731	3471145	2567092	2854995	4378638	3413977	2964780	2388418	2820425	4334866
3.2	3695580	2545968	3385490	4864479	2501840	3189305	3343210	2652004	3233961	4485237	3312075	3490233	2573678	2874190	4401089	3404198	2976613	2382920	2811603	4318209
3.4	3677505	2548329	3391978	4829783	2548329	3175522	3302600	2696388	3231130	4469624	3344203	3507586	2578249	2895017	4392432	3439573	2969485	2401664	2808628	4322835
3.6	3672559	2513577	3358176	4792085	2513577	3155486	3311282	2669856	3228409	4462253	3326251	3521804	2550289	2876062	4385948	3381844	2951421	2383102	2795144	4324778
3.8	3664545	2535080	3395271	4818092	2535080	3162779	3319973	2642607	3235379	4494818	3326391	3509670	2567868	2871771	4381252	3382029	2953858	2334863	2798161	4321849
4	3699545	2548814	3364205	4739285	2548814	3168781	3318315	2649293	3232126	4476039	3355786	3469939	2553286	2869556	4398951	3415948	2962139	2391143	2805900	4316715
4.2	3658109	2500750	3359173	4899670	2500750	3157216	3328108	2671496	3206955	4458379	3319844	3515443	2559980	2868835	4366195	3380809	2930790	2379651	2814423	4333108
4.4	3675483	2553776	3362424	4835688	2553776	3144594	3335960	2654689	3231046	4470497	3326365	3502510	2548975	2884608	4355408	3372686	2944704	2387749	2805822	4342285
4.6	3655196	2490738	3362949	4849577	2490738	3140851	3317407	2638159	3228844	4463388	3313397	3503541	2571771	2870343	4392968	3392883	2911942	2377400	2798920	4348879
4.8	3642771	2515065	3357834	4816659	2515065	3144263	3317119	2652377	3195932	4471147	3311176	3529889	2538730	2864804	4395066	3376527	2941795	2359554	2789951	4357719
5	3665219	2572042	3336556	4820799	2572042	3172833	3287695	2641951	3214356	4428644	3301964	3507442	2538856	2880635	4372054	3394188	2980807	2387695	2783972	4320080
5.2	3646630	2531936	3348962	4839028	2531936	3141650	3282495	2656292	3198694	4474121	3307490	3498403	2529541	2856831	4395992	3376200	2964625	2365824	2794962	4334756
5.4	3680774	2512123	3352941	4778486	2512123	3167849	3303862	2627516	3188196	4435211	3318248	3496751	2530917	2856075	4391341	3382817	2967125	2379272	2803885	4372290
5.6	3663052	2563116	3337829	4811151	2563116	3138551	3318578	2628657	3184092	4464360	3271436	3495408	2549259	2870609	4377515	3413230	2946610	2353228	2792264	4382693
5.8	3662000	2556185	3345028	4797381	2556185	3157793	3309961	2657093	3200112	4468855	3293220	3502741	2570101	2854568	4356273	3405301	2964119	2367796	2766991	4384513
6	3657279	2530479	3335960	4819730	2530479	3125100	3315698	2626121	3211197	4450018	3318131	3528113	2554501	2876295	4382627	3374445	2961732	2353340	2795139	4382229
6.2	3640135	2483487	3354235	4847309	2483487	3136403	3300189	2671253	3157605	4479127	3270565	3508712	2517122	2871141	4396187	3393896	2951136	2350738	2790318	4373209
6.4	3648858	2502036	3323698	4872452	2502036	3119456	3317434	2647969	3179216	4456203	3279093	3492230	2527383	2872818	4389777	3386156	2944016	2354055	2795867	4397452
6.6	3644286	2524529	3333179	4795012	2524529	3119133	3316034	2608127	3178687	4449637	3271639	3519129	2517456	2833335	4372754	3341239	2927974	2352853	2814374	4406219
6.8	3624807	2546814	3321581	4779567	2586814	3134063	3305438	2633920	3176409	4471334	3291673	3486852	2532123	2838580	4372853	3385487	2935161	2325829	2795657	4417065
7	3623526	2510105	3310779	4805763	2510105	3143650	3259634	2634987	3172466	4451167	3275966	3471024	2508881	2869178	4380337	3384091	2923507	2354313	2807952	4435313
7.2	3629158	2519512	3325050	4779754	2519512	3142256	3303358	2611374	3138326	4438905	3273078	3477066	2514538	2850669	4360559	3347238	2945010	2349956	2814055	4436369
7.4	3667605	2517808	3352242	4811850	2517808	3135359	3303987	2620773	3138984	4457880	3282386	3509893	2498714	2843312	4355925	3419489	2919272	2347838	2812297	4458638
7.6	3660998	2522951	3338567	4843182	2542951	3146996	3293485	2652628	3160164	4468770	3290561	3513658	2500512	2862158	4372482	3363453	2946917	2373143	2793977	4448217
7.8	3656612	2455312	3300419	4868625	2455312	3144361	3310117	2610348	3156017	4469375	3268066	3518752	2520825	2838602	4386010	3404175	2937588	2339792	2795201	4429191
8	3635648	2491734	3280905	4852009	2491734	3153474	3311667	2625137	3148042	4423388	3267201	3480187	2498863	2855797	4363456	3397875	2953034	2345460	2781133	4454577
8.2	3635354	2500340	3286081	4813561	2500340	3120326	3322190	2602770	3172354	4477068	3270044	3461190	2510080	2847451	4379163	3352088	2936134	2347930	2807280	4468273
8.4	3618716	2491840	3303624	4851995	2491840	3119949	3301639	2583017	3148674	4456350	3281867	3453923	2511943	2841495	4362636	3385998	2939033	2369010	2776376	4441332
8.6	3591333	2502457	3299694	4797864	2602457	3138493	3304637	2582202	3142914	4476559	3277422	3499241	2529520	2831363	4377896	3363744	2921701	2325232	2773186	4419775
8.8	3636548	2511382	3304265	4756095	2511382	3126100	3302334	2586947	3147196	4446464	3270198	3495085	2493757	2859741	4345222	3419211	2936567	2361615	2778590	4454779
9	3635343	2468133	3276253	4748040	2468133	3127439	3304663	2586562	3145338	4417829	3292654	3483357	2521743	2856091	4373399	3393058	2932989	2312726	2789214	4452350
9.2	3619777	2494604	3277006	4862361	2494604	3137614	3294603	2628882	3127232	4469409	3272219	3442564	2522574	2834366	4346568	3348514	2953949	2339677	2807047	4461711
9.4	3603029	2474315	3287409	4806993	2474315	3124710	3276616	2631576	3128129	4469016	3270348	3485742	2494774	2849202	4390234	3352325	2956263	2354499	2765568	4440885
9.6	3619945	2500888	3308225	4845833	2500888	3110711	3276288	2599153	3132213	4446623	3278861	3539790	2500795	2839480	4354404	3349516	2958130	2362860	2795911	4447396
9.8	3613712	2463354	3277920	4785467	2463354	3132264	3287035	2613653	3123296	4426540	3277539	3480280	2534463	2842720	4355060	3351813	2968429	2362594	2787891	4467154
10	3628012	2520834	3259684	4731614	2510834	3105978	3288249	2597022	3124492	4448047	3259693	3492377	2501159	2841395	4372482	3386702	2933329	2352403	2767785	4456804
10.2	3642168	2461849	3284011	4752754	2501849	3134559	3276783	2624501	3118008	4443124	3266960	3472087	2523838	2851251	4389380	3408395	2935558	2356351	2790253	4448599
10.4	3636193	2465471	3284711	4730455	2465471	3130629	3302231	2599730	3111585	4447766	3293243	3481564	2538545	2848450	4395009	3346114	2920145	2325554	2772611	4423622
10.6	3666060	2476543	3281619	4754386	2496543	3128654	3278288	2599632	3104030	4448950	3251251	3437991	2505903	2851642	4346588	3349833	2929186	2344316	2765737	4427854
10.8	3647068	2476796	3266244	4797671	2476796	3150796	3291833	2611732	3106541	4441201	3258221	3450133	2517091	2828327	4373807	3370577	2918475	2348533	2773088	4447091
11	3623912	2490991	3268121	4863732	2490991	3116543	3289870	2606279	3102383	4468186	3233451	3499772	2490416	2832758	4367035	3374411	2943913	2374563	2758033	4434309
11.2	3636786	2497209	3282171	4734509	2507209	3140374	3318286	2580393	3107197	4440376	3287763	3475271	2505689	2844294	4322410	3369838	2944387	2335179	2764599	4435950
11.4	3639821	2527648	3284295	4736268	2547648	3120569	3278453	2593399	3096200	4431466	3271856	3504401	2479263	2849675	4369002	3375872	2937970	2340909	2771463	4452910
11.6	3627408	2525516	3246699	4731055	2525516	3118868	3297784	2595700	3114958	4457475	3250932	3488242	2499624	2836829	4393006	3377139	2938617	2353575	2775839	4429543
11.8	3616360	2466739	3257800	4793412	2466739	3124772	3295609	2622207	3087876	4428679	3245465	3461413	2496458	2834594	4355272	3373922	2916169	2355918	2768801	4416062
12	3620967	2517907	3246192	4755562	2317907	3131826	3269426	2621505	3081972	4402659	3235461	3468862	2506514	2852876	4387444	3364563	2930414	2353810	2769737	4432311
12.2	3634117	2523077	3260811	4704315	2523077	3105207	3274589	2603055	3097408	4449500	3249313	3471948	2480128	2842799	4341778	3335999	2949829	2344026	2778840	4425139
12.4	3620085	2526125	3271871	4718935	2526125	3116607	3295196	2602066	3095542	4434878	3261772	3480030	2499312	2852044	4345518	3354203	2918586	2356953	2775717	4441740
12.6	3616029	2464008	3259842	4706421	2464008	3117315	3284751	2601240	3088904	4458204	3274658	3462408	2502667	2849874	4359603	3382319	2936849	2348128	2776843	4438759
12.8	3617562	2512852	3246638	4742899	2512852	3107021	3284290	2621167	3092203	4480128	3253175	3478404	2506670	2837718	4390978	3353290	2956678	2338020	2784001	4425400
13	3678093	2491882	3232640	4775062	2491882	3118270	3281271	2563758	3100707	4466932	3241278	3474879	2507323	2837346	4335094	3369695	2953042	2367160	2786387	4408374
13.2	3642646	2463204	3250789	4804575	2463204	3132621	3279018	2621740	3077350	4436835	3227135	3435991	2512272	2830573	4342184	3350521	2925258	2340909	2778204	4411337
13.4	3632890	2480391	3261458	4799541	2480391	3143536	3293859	2593913	3092222	4453680	3247627	3471374	2510755	2837599	4377444	3348290	2912362	2346719	2762815	4384936
13.6	3626845	2428389	3233169	4770042	2428389	3138817	3302793	2574023	3057846	4447829	3239105	3470807	2503906	2842298	4374680	3375151	2923425	2343751	2777067	4440095
13.8	3621844	2498226	3228282	4756959	2498226	3121022	3282501	2605878	3080935	4462346	3226359	3478577	2514523	2831979	4367315	3355973	2906409	2356005	2778177	4419613
14	3625433	2456615	3251406	4753561	2456615	3115013	3281119	2574367	3051947	4444560	3249586	3480377	2513788	2835636	4362477	3349486	2915724	2346237	2780658	4399026
14.2	3627848	2464011	3226192	4763084	2464011	3143776	3259095	2605329	3083542	4429303	3223435	3433033	2516146	2823362	4393933	3339979	2922794	2355848	2764378	4398574
14.4	3633987	2451999	3225075	4761065	2451999	3137010	3291781	2626025	3075288	4454729	3258632	3422209	2510106	2839659	4352431	3365596	2925366	2367996	2788048	4391282
14.6	3615560	2503791	3239692	4717154	2503791	3099280	3265768	2621151	3062017	4418123	3218282	3438551	2493260	2844857	4347916	3379718	2925396	2361487	2782719	4399878
14.8	3625678	2479865	3213674	4827144	2479865	3117551	3300535	2613415	3082690	4434868	3225960	3429556	2493906	2823273	4353679	3386380	2927447	2327632	2767022	4434873
15	3615258	2521219	3231849	4783528	2521219	3108041	3279412	2614547	3077546	4441931	3231647	3457330	2511260	2851539	4344416	3392690	2913441	2349641	2765395	4429463
15.2	3622704	2471102	3229628	4791610	2471102	3143725	3299134	2620432	3054493	4432429	3232302	3445357	2495829	2828087	4354736	3337842	2935044	2341928	2751541	4401769
15.4	3596658	2500479	3228988	4770467	2500479	3116885	3301179	2589421	3044326	4438226	3238642	3443935	2503503	2821933	4386065	3376414	2932720	2352860	2770568	4415787
15.6	3575288	2464803	3256105	4681518	2464803	3107747	3272854	2594542	3065926	4448661	3235189	3468120	2513888	2823840	4353248	3363905	2927969	2334964	2739289	4404526
15.8	3586736	2441238	3225643	4756051	2441238	3104445	3280057	2599465	3046383	4414597	3238872	3453664	2528576	2846332	4364837	3374789	2917285	2353996	2768936	4430646
16	3588833	2513902	3207895	4693509	2513902	3131224	3273123	2577999	3061537	4414945	3249250	3424783	2513485	2841388	4395596	3353227	2924211	2367203	2781081	4400662
16.2	3609757	2506299	3226645	4704167	2506299	3110438	3295529	2590476	3053805	4414534	3221612	3435882	2495193	2823423	4375342	3367216	2912951	2370484	2769552	4381623
16.4	3589403	2525336	3208330	4622031	2525336	3112272	3306617	2606009	3044947	4438465	3238677	3467776	2522885	2835053	4362672	3343737	2906365	2336908	2730773	4409323
16.6	3596560	2478639	3231555	4716512	2478639	3110885	3283464	2597425	3039997	4457365	3246215	3461172	2496177	2802525	4374610	3364968	2929792	2352364	2775773	4442816
16.8	3577819	2481244	3230784	4650646	2481244	3119246	3279242	2567838	3041380	4451893	3211119	3423867	2495327	2815811	4374122	3395780	2950753	2349544	2759213	4383234
17	3573518	2478579	3204709	4653466	2478579	3105335	3283494	2576786	3056201	4453241	3247924	3433010	2491689	2809127	4385219	3369002	2913777	2357829	2745699	4423220
17.2	3574050	2468726	3239673	4611673	2468726	3100909	3288667	2589579	3028830	4429643	3217238	3423284	2502847	2845319	4344297	3364040	2923806	2365313	2752583	4426720
17.4	3585010	2440955	3211041	4636304	2440955	3114044	3286886	2619444	3027782	4435725	3228741	3440548	2510163	2821403	4368111	3358939	2920148	2341864	2737526	4445347
17.6	3597186	2430187	3211414	4666000	2430187	3122227	3290654	2589595	3014580	4433986	3252473	3431125	2487442	2806003	4376097	3357491	2940333	2348172	2761823	4444617
17.8	3563686	2455890	3205495	4662595	2455890	3101752	3299311	2581461	3028405	4436786	3188851	3427074	2482290	2825913	4360478	3354328	2921291	2348471	2776136	4428721
18	3581451	2448567	3222474	4652488	2448567	3110709	3281430	2633116	3009886	4450838	3234902	3417177	2514996	2824603	4345014	3380531	2918105	2342048	2766236	4426618
18.2	3601703	2490945	3170514	4740797	2490945	3102320	3244795	2590094	3040557	4447991	3232519	3434724	2513687	2840983	4334051	3348922	2915132	2345600	2774684	4444446
18.4	3613438	2459952	3201870	4673156	2459952	3139945	3285424	2547216	3013291	4435260	3221250	3440711	2499498	2818810	4365330	3346958	2916690	2331236	2766777	4423706
18.6	3597712	2463219	3212584	4714630	2463219	3130129	3273033	2560027	3035788	4408715	3211315	3462227	2500268	2829766	4385936	3361062	2927743	2327299	2790690	4415565
18.8	3554532	2470777	3202767	4667168	2470777	3127560	3271458	2600277	3021012	4430999	3235875	3420789	2483041	2835928	4347913	3354406	2923278	2338765	2771657	4399799
19	3598672	2459018	3217788	4722983	2459018	3123898	3278172	2596228	3012757	4469367	3215799	3442660	2516695	2817735	4348188	3362427	2890731	2348663	2757416	4429573
19.2	3572180	2453719	3189148	4792496	2453719	3138492	3291317	2557784	3033427	4442214	3222028	3433986	2512460	2810791	4369459	3346801	2891898	2352149	2765818	4404250
19.4	3580615	2470066	3197143	4724420	2470066	3119671	3305134	2593390	3010835	4476305	3219945	3446404	2507730	2828847	4365391	3350792	2884197	2335322	2770980	4416965
19.6	3600441	2453818	3228408	4768573	2453818	3110725	3252015	2574803	2989216	4449175	3252752	3416399	2496789	2800307	4351769	3361628	2913466	2354823	2776221	4430428
19.8	3562521	2488049	3181052	4779191	2488049	3091959	3261139	2566221	3013367	4445313	3224667	3427602	2483068	2816740	4394031	3352366	2910240	2323203	2750231	4416297
20	3575467	2525089	3190468	4773354	2525089	3133397	3287136	2587377	3010627	4449278	3224315	3435752	2510637	2818298	4404902	3371215	2918437	2344518	2767985	4444842
20.2	3597186	2500479	3217788	4667168	2500479	3144158	3337852	2594542	3012757	4435260	3280634	3423706	2511500	2800307	4374610	3364643	2913466	2345600	2771657	4426618
20.4	3649758	2501840	3221136	4792496	2501840	3136217	3294903	2627985	3041086	4442214	3254688	3469123	2566221	2875835	4353248	3409659	2900442	2370370	2816807	4435543
20.6	3593904	2470711	3182421	4821546	2470711	3127294	3286046	2626064	3027815	4526935	3244094	3445167	2534390	2839907	4398600	3364837	2911729	2366613	2768995	4507651
20.8	3603118	2438440	3163637	4753072	2438440	3135866	3258535	2576277	3027420	4469598	3220165	3417491	2520658	2821599	4413764	3336858	2875779	2368334	2779055	4452563
21	3585865	2470078	3194414	4795864	2470078	3142165	3299597	2563735	3018857	4461194	3240984	3448844	2505383	2803938	4406237	3360375	2904093	2365590	2761856	4473608
21.2	3557039	2497483	3198273	4758351	2497483	3121685	3259661	2567708	3009392	4485080	3228078	3406725	2496086	2822215	4397200	3367648	2898355	2345522	2757632	4414722
21.4	3562239	2437877	3171967	4726645	2437877	3114987	3278578	2618795	2999928	4470050	3204938	3418109	2492920	2833972	4375359	3364323	2900682	2374022	2768488	4444960
21.6	3553119	2463400	3132959	4757419	2463400	3108113	3298396	2577445	2981640	4462551	3205812	3420207	2483631	2822799	4348566	3365101	2916963	2376609	2778064	4435543
21.8	3565769	2460774	3136249	4694380	2460774	3108417	3243432	2556503	2976102	4466116	3259832	3423706	2525718	2814644	4362085	3353624	2914813	2349940	2755735	4466591
22	3570316	2462547	3170944	4726924	2462547	3116321	3256469	2573900	2983619	4425974	3221946	3458648	2511500	2821204	4338942	3382101	2892035	2354905	2761806	4431266
22.2	3569313	2514628	3171122	4721991	2514628	3111776	3273115	2561087	2992618	4440331	3230375	3433543	2528349	2813843	4390259	3367675	2893509	2366335	2743863	4496704
22.4	3558022	2468019	3161117	4712192	2468019	3115513	3275912	2552272	2979131	4452455	3199928	3412936	2521526	2815821	4352678	3369321	2869077	2365482	2751754	4475742
22.6	3569458	2453812	3141892	4668786	2453812	3112926	3290818	2562425	2991493	4471742	3192230	3386183	2500738	2796146	4368602	3345534	2913288	2342305	2755700	4450562
22.8	3569522	2473734	3152383	4675749	2473734	3112979	3233205	2572255	2982126	4457375	3256227	3399937	2500231	2822867	4360691	3375492	2905726	2346014	2761414	4489704
23	3562531	2473893	3171455	4691226	2473893	3128753	3225588	2582185	2978023	4469108	3244464	3383314	2489619	2823350	4379839	3363985	2921803	2338363	2758174	4435664
23.2	3537384	2467693	3169890	4709026	2467693	3094650	3248893	2570553	2978963	4459885	3222463	3395381	2532751	2819621	4346978	3330984	2912788	2344438	2773912	4460062
23.4	3541277	2470912	3160381	4659678	2470912	3095116	3214777	2611107	2986190	4454187	3231605	3393137	2514751	2832101	4333935	3336094	2859954	2353724	2755135	4487957
23.6	3545420	2466634	3166906	4659537	2466634	3127815	3268904	2561725	2995616	4470488	3257187	3412878	2520902	2845320	4341611	3356611	2893904	2350814	2762076	4484492
23.8	3556246	2447699	3166481	4637128	2447699	3118187	3250450	2603824	2986406	4416685	3243519	3404955	2516905	2828269	4330780	3380714	2894812	2365073	2753024	4475741
24	3547957	2441960	3153788	4681844	2441960	3095931	3271565	2573488	2997548	4424937	3234046	3414536	2513703	2813792	4327435	3345439	2902363	2346339	2767297	4440955
24.2	3534299	2473041	3168802	4626389	2473041	3138695	3267570	2557621	2980644	4447614	3250002	3445155	2491113	2810779	4358687	3360330	2919412	2370636	2767955	4469771
24.4	3503793	2467079	3158865	4708627	2467079	3104581	3249844	2544877	2955491	4441300	3233666	3410540	2508465	2835574	4349457	3367400	2898481	2357031	2729190	4481393
24.6	3533570	2480322	3146390	4677550	2480322	3123896	3246581	2534151	2953810	4445120	3243913	3418580	2514369	2806509	4352735	3374925	2897133	2351537	2743401	4451347
24.8	3517725	2455769	3168050	4689827	2455769	3115557	3246039	2553429	2968422	4475930	3237549	3408673	2525666	2800893	4364676	3365434	2883321	2370021	2762625	4474498
25	3537917	2477290	3153891	4700582	2477290	3106125	3253190	2584417	2971232	4479009	3228636	3389892	2496390	2831765	4381270	3343275	2885837	2331052	2741276	4477900
25.2	3532495	2452644	3149726	4705135	2452644	3109401	3246787	2530016	2972744	4465073	3218510	3420494	2497262	2808554	4378702	3373466	2886365	2359407	2743955	4473183
25.4	3540389	2402123	3152439	4641028	2402123	3119396	3223887	2555658	2971526	4425572	3225224	3427099	2525623	2814910	4342094	3348466	2879560	2332852	2743925	4448339
25.6	3534167	2433403	3141780	4696757	2433403	3132520	3235582	2536665	2966096	4462957	3213207	3428948	2508162	2826263	4365784	3376638	2861705	2337995	2764384	4471412
25.8	3526386	2440262	3150612	4798480	2440262	3103222	3229355	2542850	2989985	4490294	3225204	3407098	2530430	2803906	4367611	3356548	2878275	2352242	2740405	4493157
26	3531383	2416941	3150652	4753965	2416941	3087587	3229668	2572859	2962940	4441978	3243724	3408104	2525065	2818981	4356618	3380079	2887613	2365275	2748828	4500913
26.2	3514705	2449148	3154800	4763794	2449148	3101160	3239086	2587832	2969185	4436000	3214549	3384801	2519002	2796573	4364895	3375150	2893181	2344325	2768267	4469792
26.4	3508519	2395953	3154374	4751260	2395953	3117105	3232902	2571445	2944388	4453584	3220152	3393771	2494393	2828095	4371499	3364726	2894635	2357599	2765885	4452664
26.6	3472635	2402626	3129971	4749555	2402626	3131190	3260732	2568984	2953604	4451744	3213225	3430931	2507892	2821620	4371882	3396436	2920402	2347516	2745334	4487967
26.8	3475647	2464426	3160203	4677780	2464426	3113947	3230951	2560338	2962231	4461944	3227032	3426085	2511492	2795764	4367731	3348257	2902856	2362130	2740664	4445386
27	3541066	2456378	3142507	4663404	2456378	3127917	3230979	2546860	2947275	4428053	3229912	3413607	2517661	2818192	4358599	3369265	2881566	2350323	2753984	4462674
27.2	3534734	2448076	3143347	4701967	2448076	3121345	3240487	2549616	2959286	4484959	3225879	3420322	2538226	2811032	4366386	3361284	2905649	2355533	2764582	4453116
27.4	3501650	2489407	3128877	4698358	2489407	3091495	3242772	2551850	2957356	4455187	3214010	3439028	2528562	2800493	4365167	3353604	2887966	2355055	2761913	4463299
27.6	3511624	2433854	3125573	4641105	2433854	3126877	3237825	2527608	2963089	4421606	3247455	3384419	2521462	2832761	4361918	3323920	2891487	2384101	2734135	4441043
27.8	3503115	2456640	3131501	4688144	2456640	3101481	3241321	2538367	2963767	4422498	3244134	3384717	2474569	2804169	4348275	3328399	2889025	2348216	2739803	4460850
28	3522266	2460108	3122479	4645165	2460108	3103647	3220077	2535187	2961608	4473122	3221579	3377273	2485368	2815794	4407417	3343847	2915428	2376349	2759929	4449868
28.2	3511195	2409834	3130487	4614026	2409834	3118274	3258642	2550069	2969945	4445517	3214367	3404095	2519243	2817409	4359331	3382997	2904868	2362999	2738813	4443479
28.4	3533810	2411497	3152936	4581318	2411497	3117866	3224780	2550638	2943845	4471690	3192575	3408788	2503070	2808832	4349245	3373578	2902511	2388855	2757714	4460649
28.6	3513719	2383881	3147048	4584231	2383881	3111591	3243364	2519957	2936003	4445078	3211823	3412407	2519616	2831822	4378175	3374764	2879829	2371344	2744283	4448733
28.8	3523551	2438115	3110914	4487341	2438115	3102229	3254858	2591134	2935349	4435110	3232994	3402531	2522370	2815249	4364408	3357917	2887180	2368923	2756984	4459226
29	3528043	2457522	3119823	4485211	2457522	3110022	3242335	2533685	2928057	4450319	3206632	3405012	2524176	2827958	4336639	3354343	2879688	2370168	2745329	4445859
29.2	3517468	2507763	3128896	4460920	2507763	3111579	3234729	2551821	2936534	4453856	3216618	3412103	2504903	2834570	4362463	3360753	2892686	2393789	2734570	4416959
29.4	3534053	2475507	3126330	4413082	2475507	3134456	3224211	2504051	2937986	4443579	3199903	3400330	2512512	2797871	4348134	3361770	2898432	2388904	2759318	4451497
29.6	3493113	2439205	3095941	4429352	2439205	3131627	3230178	2542248	2936881	4456629	3252468	3428014	2524322	2825526	4377214	3377692	2905026	2359187	2743249	4468248
29.8	3535507	2434983	3133828	4327744	2434983	3120101	3204382	2570277	2957692	4455176	3236917	3423986	2484172	2816656	4333986	3325388	2869864	2367993	2748847	4426511
30	3485529	2467341	3120334	4313927	2467341	3118251	3222181	2552722	2950629	4455091	3210714	3393996	2489397	2808005	4347138	3344931	2859847	2398015	2733845	4430446
30.2	3510293	2434496	3101497	4290064	2434496	3124113	3212304	2541759	2935997	4446282	3240558	3394386	2500865	2823732	4326640	3367587	2873484	2381211	2755889	4470838
30.4	3517572	2462529	3111506	4316906	2462529	3123066	3224865	2546338	2949456	4443049	3247609	3395701	2494723	2809269	4353598	3339899	2864324	2362029	2756852	4477697
30.6	3511753	2416344	3095032	4340855	2416344	3131434	3238063	2488667	2953510	4443936	3213786	3386890	2509385	2780841	4358766	3384897	2880718	2405453	2754771	4470687
30.8	3484836	2382990	3114622	4305968	2382990	3150867	3237686	2524726	2933857	4470349	3208310	3383836	2506469	2822546	4334787	3364643	2855656	2378634	2761687	4443600
31	3527534	2409368	3097913	4447430	2409368	3126645	3226217	2529798	2938244	4441190	3189003	3414991	2516145	2816308	4365410	3350794	2847900	2360620	2740098	4434637
31.2	3499239	2399642	3104629	4409322	2399642	3094703	3237605	2556293	2912793	4454716	3206089	3359280	2505233	2815031	4344022	3350422	2867948	2374626	2759628	4416806
31.4	3484140	2411608	3126655	4399036	2411608	3128894	3210165	2519805	2949077	4456643	3240018	3391331	2500092	2813231	4367740	3334017	2907582	2360610	2745845	4447773
31.6	3492582	2446438	3102397	4369944	2446438	3116834	3226633	2552505	2936761	4425700	3207792	3384165	2534640	2825193	4388680	3385482	2859298	2383744	2732608	4443364
31.8	3503295	2434896	3127242	4446367	2434896	3100215	3205981	2545632	2905403	4460227	3220493	3367910	2522428	2807727	4389084	3379805	2843268	2369997	2747526	4435946
32	3490389	2471406	3096480	4391914	2471406	3129351	3203613	2518849	2924049	4467877	3241307	3360861	2530774	2806689	4369170	3358522	2860625	2369525	2750613	4425839
32.2	3535507	2462894	3181052	4510801	2462894	3444404	3580470	3024730	3267830	5270415	3283409	3394386	2509639	2831822	4353677	3364643	2913466	2358032	2763150	4435692
32.4	3517468	2472117	3171967	4545036	2472117	3348824	3419654	2811228	3078406	4844313	3227867	3375568	2543449	2815249	4342657	3391145	2897388	2400889	2744227	4405434
32.6	3499239	2473406	3160203	4531075	2473406	3299328	3363248	2735750	3010648	4703832	3214667	3388474	2522961	2833472	4321826	3378606	2870833	2385983	2749032	4433454
32.8	3516541	2546302	3155547	4380232	2546302	3228924	3354305	2686779	2977740	4617344	3205763	3381069	2521241	2802595	4352787	3359546	2874627	2369842	2747759	4437734
33	3502679	2496182	3134071	4407800	2496182	3224053	3304660	2673319	2986508	4601025	3216449	3356414	2524789	2821594	4339612	3367068	2870154	2379684	2771144	4465049
33.2	3498861	2487296	3104540	4382019	2487296	3233344	3296250	2654359	2948473	4601467	3215821	3386172	2502037	2794770	4333960	3346853	2836059	2356201	2762196	4440067
33.4	3494168	2488073	3130216	4408742	2488073	3222592	3287884	2687487	2965161	4545444	3216724	3357830	2496317	2784771	4331620	3367336	2859710	2358032	2763383	4433840
33.6	3509114	2494812	3108426	4400312	2494812	3219918	3283690	2626884	2943273	4525674	3221293	3367712	2511677	2805449	4353677	3356954	2856938	2345222	2752433	4435692
33.8	3492218	2490653	3108879	4356771	2490653	3207518	3281571	2611187	2947007	4503879	3225167	3360486	2509639	2785500	4342657	3367318	2866165	2370912	2745877	4405434
34	3480595	2468491	3123133	4402957	2468491	3213756	3299886	2641510	2942572	4518523	3176762	3337983	2482367	2782792	4321826	3396348	2847976	2363732	2745909	4433454
34.2	3452990	2472117	3117779	4412423	2472117	3205928	3259142	2595105	2941081	4496704	3207561	3377760	2538453	2795178	4352787	3395383	2843199	2382278	2759831	4437734
34.4	3491846	2494463	3108609	4442790	2494463	3162345	3289169	2593989	2920578	4482036	3242272	3349987	2483372	2816177	4348692	3349711	2844469	2370425	2766152	4465049
34.6	3495984	2448308	3115776	4457941	2448308	3164391	3263689	2577545	2942522	4493804	3233888	3392281	2510154	2797505	4319479	3339571	2835002	2398124	2737019	4408501
34.8	3491387	2462894	3109331	4510801	2462894	3160394	3254736	2588143	2909801	4485354	3214576	3401749	2517697	2822523	4371415	3334931	2836642	2376254	2758107	4429909
35	3493694	2467197	3109120	4479809	2467197	3174730	3307352	2580844	2900937	4509971	3228235	3377376	2480173	2824562	4352921	3331563	2832793	2386499	2742072	4445602
35.2	3483052	2484390	3120035	4536443	2484390	3169340	3268316	2602409	2929497	4482910	3231483	3358492	2525392	2800999	4385144	3342612	2808245	2360591	2743007	4454739
35.4	3403363	2386275	3120760	4511069	2386275	3188000	3279360	2560402	2897457	4496421	3206419	3339076	2479306	2801339	4372744	3369074	2848377	2379992	2744278	4400714
35.6	3442200	2452005	3099736	4545036	2452005	3150283	3297615	2584989	2934131	4490105	3229065	3376907	2500901	2804721	4356269	3368242	2818348	2351719	2750623	4443342
35.9	3435215	2415718	3126772	4525056	2415718	3181404	3286704	2572468	2906986	4480519	3212630	3371864	2488426	2800406	4326848	3357038	2834568	2375719	2750417	4442213
36	3464822	2465700	3082643	4555554	2465700	3160016	3268532	2575194	2918194	4490293	3211100	3363712	2498083	2800238	4373130	3343761	2816552	2372067	2723708	4421588
36.2	3473905	2463092	3104684	4483446	2463092	3175430	3271011	2579710	2918487	4464832	3213233	3335215	2509031	2796448	4342637	3380298	2804112	2360129	2742952	4461381
36.4	3462137	2405516	3107436	4486000	2405516	3182945	3245476	2584625	2896772	4462779	3193473	3351743	2518176	2803684	4356883	3384406	2795204	2368234	2763150	4416201
36.6	3448712	2439997	3110562	4463076	2439997	3169178	3285363	2558891	2904968	4464948	3208785	3350630	2531805	2801362	4375732	3350313	2805384	2379107	2744227	4461203
36.8	3452300	2445387	3105854	4490226	2445387	3176084	3302925	2596734	2902598	4491664	3184019	3326998	2507822	2789904	4349853	3346046	2826017	2393654	2749032	4420707
37	3455557	2455321	3111483	4485411	2455321	3163632	3243393	2568929	2906156	4475887	3211833	3327727	2537518	2780357	4340680	3338578	2812232	2385998	2747759	4437838
37.2	3443127	2423460	3105952	4421902	2423460	3161744	3272374	2584129	2911383	4449392	3215769	3315678	2561925	2801397	4351617	3318654	2787863	2360247	2752545	4431327
37.4	3474548	2476652	3085855	4425789	2476652	3162537	3276329	2552736	2897173	4469151	3214852	3334362	2527918	2809324	4334743	3340344	2783898	2386561	2758458	4422343
37.6	3436889	2496932	3084360	4441491	2496932	3174932	3267639	2551027	2897723	4467212	3241797	3331125	2506823	2803926	4348278	3368417	2806815	2355689	2745978	4448055
37.8	3440155	2424234	3090548	4446260	2424234	3121207	3247474	2571525	2921425	4470589	3224202	3336784	2519778	2818593	4357224	3387257	2799915	2366694	2735423	4436166
38	3440349	2417702	3074940	4405332	2417702	3142462	3243807	2561516	2902680	4502084	3232386	3332922	2513445	2816864	4367718	3370483	2794745	2392718	2735994	4433867
38.2	3421630	2434661	3076342	4421449	2434661	3138875	3249383	2604193	2904771	4454624	3213573	3310061	2520360	2806239	4357132	3356148	2799606	2380946	2744368	4427642
38.4	3440411	2450602	3093081	4408269	2450602	3186499	3264760	2556922	2898825	4469234	3199233	3341583	2524079	2791844	4330475	3323569	2802006	2394711	2757565	4439439
38.6	3433061	2423713	3098857	4469424	2423713	3158354	3275718	2583941	2909012	4444376	3197908	3316782	2518146	2795319	4361516	3384191	2794001	2391062	2747752	4413474
39	3402116	2433345	3107835	4448523	2433345	3148419	3286852	2579282	2906172	4476550	3227864	3310463	2520872	2800499	4354766	3372027	2796637	2378456	2730428	4448931
39.2	3421271	2425643	3081766	4388569	2425643	3161544	3271980	2559318	2912459	4486693	3215081	3309820	2489818	2781664	4338462	3367798	2808740	2392256	2742121	4449829
39.4	3441129	2449398	3056158	4489861	2449398	3178832	3274510	2554931	2883519	4499348	3214637	3312445	2486564	2807478	4346302	3363798	2812099	2370521	2757487	4445905
39.6	3443132	2455101	3086082	4500449	2455101	3132118	3271969	2585732	2877012	4480866	3213111	3306229	2482266	2829723	4356515	3357088	2789218	2386654	2742417	4456015
39.8	3418435	2405513	3090426	4543905	2405513	3175226	3273666	2553783	2890160	4502628	3226183	3314831	2531143	2812412	4358306	3346342	2795934	2379508	2759254	4438688
40	3436668	2428949	3089875	4506200	2428949	3153245	3262349	2603202	2877179	4487908	3237689	3288794	2493380	2789387	4371499	3357354	2782559	2388420	2722639	4455753
40.2	3440458	2475360	3079801	4548005	2475360	3160625	3271911	2529099	2907637	4457052	3233828	3353099	2512079	2790660	4331194	3372520	2799739	2380341	2752776	4450244
40.4	3391497	2452734	3101443	4596914	2452734	3136828	3274797	2597148	2896714	4469068	3217858	3317439	2522740	2797871	4340888	3373177	2791816	2380922	2761410	4476641
40.6	3410871	2411813	3065849	4624942	2411813	3132033	3280357	2569941	2912571	4478488	3213923	3297626	2483699	2791777	4325602	3361524	2794506	2378266	2765092	4462856
40.8	3446130	2408296	3073111	4619300	2408296	3159287	3241321	2524591	2872548	4460215	3228100	3344939	2504061	2816053	4313813	3342655	2791087	2406590	2750709	4439130
41	3428518	2417444	3074684	4606477	2417444	3159731	3268419	2528774	2884943	4448713	3201607	3292825	2507589	2781484	4362231	3348705	2807409	2397158	2769354	4461373
41.2	3431013	2390581	3065205	4669334	2390581	3153023	3239667	2554415	2886735	4432212	3215707	3287882	2482393	2806131	4335364	3337924	2805608	2380457	2745755	4450363
41.4	3388391	2374131	3065066	4672832	2374131	3147454	3252008	2592607	2893569	4468427	3193477	3329653	2494514	2773869	4338220	3348097	2788388	2369897	2740817	4462932
41.6	3399933	2434676	3092227	4685344	2434676	3152690	3255894	2552272	2903984	4457393	3203049	3323311	2510892	2797907	4348460	3349146	2801032	2382407	2739782	4493392
41.8	3408065	2387344	3092946	4685064	2387344	3135735	3252007	2590666	2876485	4463253	3218034	3313051	2506696	2787712	4351884	3357791	2777229	2386041	2739857	4462122

## Sheet: Fig.2E and Fig.2F
23C09Vglut,UASGCaMP6.0m response to Air, 0.5% CO2, 1% CO2 and 2% CO2
Time	Air												0.5%												0.01												0.02
0.2	3207469	1057729	1189613	3075764	3305484	1680258	4176255	2751804	3805309	2717823	3007982	3020880	3450357	9313448	4099021	3691667	3568451	1680258	2772386	4805774	3805309	3016721	3007982	3020880	6921545	4821396	3157907	3123228	3148942	1535134	2577183	4122678	3922931	2796617	1950127	3001066	4978333	4939287	2312202	2786785	3124479	1311757	1980685	3608546	3993337	2717823	1640078	3074479
0.4	3152935	1058926	1146637	3099258	3118211	1684065	4060125	2761249	3831851	2717823	3030336	3067403	3681786	9404828	3902231	3284074	3204619	1684065	2810648	4808044	3831851	3000676	3030336	3067403	6029727	4609130	3173954	3215895	3067403	1559530	2575525	4150920	3928658	2791658	1973271	3013401	4049667	4760936	2385321	2624216	3223958	1284445	1970774	3605555	4005700	2717823	1615685	3073958
0.6	3059812	1056268	1204349	2886157	3136628	1690579	4140565	2763971	3761802	2706865	3040863	3045825	3394286	9060483	3859270	3581898	3217364	1690579	2823771	4824550	3761802	3040953	3040863	3045825	5787727	4528319	3123140	3036509	3045825	1557981	2571739	4118933	3917226	2795149	1956591	3059812	4214222	4634711	2440734	2644850	3283854	1306693	1978535	3661893	3982101	2706865	1629410	3063854
0.8	3081786	1083028	1108028	3051441	3463930	1683158	4064163	2761045	3828643	2773665	3030803	3012988	2783929	8665517	3822690	3353518	3041386	1683158	2801211	4819174	3828643	3017066	3030803	3012988	5456182	4531646	3403721	2934123	3012988	1530790	2529644	4180596	3907218	2791658	1930269	3081786	3986667	4661096	2119358	2502247	3171562	1280131	1982712	3621945	3975332	2773665	1636486	3041562
1	3058050	1142993	1201426	3100917	3202112	1698309	4082218	2747437	3828585	2777471	3002522	3011481	3020357	8835586	3801385	3211759	3075217	1698309	2801302	4771705	3828585	3046421	3002522	3011481	5903364	4515509	3137675	2890263	3011481	1554683	2563061	4189895	3923872	2798950	1957139	3058050	4370778	4660459	2370917	2455250	2980938	1304259	1966122	3626506	3981922	2777471	1642959	3040938
1.2	3041938	1077729	1151479	3108035	3436158	1686553	4225952	2743209	3798037	2728391	3017696	2993363	3677500	9113242	3837130	3388982	2727908	1686553	2801504	4802709	3798037	2993115	3017696	2993363	5549272	4515084	3602907	2875439	2993363	1538598	2533649	4130701	3925986	2796589	1946439	3041938	4212111	4629071	2085413	2549466	3135521	1287159	1983964	3615962	3991929	2728391	1615685	3055521
1.4	3002902	1053275	1234736	2996288	3312815	1682276	4197521	2790724	3823651	2763610	3083162	2980607	2917143	8581172	3818631	3308241	2667581	1682276	2795160	4696057	3823651	2978660	3083162	2980607	6023273	4501286	2759070	2736404	2980607	1539307	2565776	4191015	3915616	2794687	1971170	3002902	3983778	4639847	2362752	2419433	2994688	1283161	1974550	3623609	4032857	2763610	1615685	3054688
1.6	3017102	970898	1187606	3058079	3617977	1683715	4261517	2749278	3853958	2723521	3002522	2992573	3393929	8474897	3790784	3450232	2570924	1683715	2794767	4793766	3853958	3061545	3002522	2992573	5759182	4492305	3443605	2877228	2992573	1550321	2547353	4116726	3928762	2771669	1937893	3017102	4153667	4653306	2475688	2463015	2922188	1300483	1987950	3607291	3969553	2723521	1658345	3022188
1.8	3000147	1010018	1177430	3174978	3544897	1686484	4174927	2732495	3812621	2693210	3076063	3016328	2534286	8492690	3795557	3252500	2498859	1686484	2854460	4777688	3812621	2965019	3076063	3016328	5921454	4524214	2995465	2733772	3016328	1524481	2526609	4125042	3922258	2778950	1924900	3000147	3973333	4648369	2361101	2407041	2959896	1294598	1986687	3622019	3998579	2693210	1659062	3069896
2	2977839	1042042	1199542	2991790	3670352	1687669	4174791	2724897	3797069	2713771	3017079	2998364	3671429	8536345	3757301	3261620	2646359	1687669	2861119	4699038	3797069	3001716	3017079	2998364	5544454	4498497	3659302	2764772	2998364	1554479	2534906	4113933	3924784	2796589	1944520	2977839	4064556	4642462	2229450	2512291	3080104	1302855	1996457	3610377	4009170	2713771	1639610	3060104
2.2	3010061	1030792	1148011	3342140	3943783	1681980	4072667	2749326	3818658	2712706	3040273	2970656	3423214	8338345	3798701	3310092	2727228	1681980	2831069	4742625	3818658	3000676	3040273	2970656	5609454	4494514	3321163	2724930	2970656	1567115	2563598	4118274	3939402	2796589	1939884	3010061	4432444	4618283	2501651	2350478	3006771	1297105	1959973	3618243	4041591	2712706	1642884	3006771
2.4	2994860	1082623	1240599	3064716	3541994	1688260	4050565	2712849	3829465	2725732	3055172	2992734	2837500	8272414	3782725	3209120	2792881	1688260	2859422	4803619	3829465	3040953	3055172	2992734	5689727	4513523	3253954	2809193	2992734	1526630	2532787	4117207	3926859	2774687	1916306	2994860	4110000	4659695	2414128	2378810	2591354	1287450	1975647	3607740	3970325	2725732	1656790	3041354
2.6	2998701	1053856	1187817	2982402	3514252	1684151	4158232	2755281	3795470	2717823	3026714	2984489	2861786	8350759	3808606	3188241	2709348	1684151	2829982	4775858	3795470	3017066	3026714	2984489	5634545	4508553	3704767	2609333	2984489	1543144	2557848	4158305	3933494	2781669	1951191	2998701	3881778	4644125	2537431	2431246	2848438	1303215	1979399	3600648	3964864	2717823	1639436	3048438
2.8	2979251	994137	1160070	3072227	3099062	1687135	4168933	2733649	3796134	2782975	3063091	3006566	3074286	8150207	3784566	3308704	2637364	1687135	2847626	4808452	3796134	3046421	3063091	3006566	5529818	4457925	2942558	2537667	3006566	1558278	2572976	4189299	3960211	2798950	1932497	2979251	3964667	4636169	2195872	2409266	2630312	1261390	1987446	3614937	3976988	2782975	1657256	3030312
3	2975747	1040018	1178063	3108035	3418182	1689183	4089697	2744432	3796988	2744372	3039236	3016420	3896429	8179655	3794692	3195972	2563234	1689183	2834711	4717740	3796988	2993115	3039236	3016420	5428909	4521628	3668605	2462737	3016420	1565993	2560528	4121736	3967859	2796589	1913538	2975747	3943000	4631850	2255780	2423170	2818750	1285156	1978701	3605471	3985730	2744372	1615685	3018750
3.2	2977140	1065898	1151725	3026856	3212610	1689359	3988525	2741843	3815674	2717823	3063889	3034395	3461786	8210759	3804835	3342870	2447581	1689359	2840898	4745638	3815674	2978660	3063889	3034395	5509182	4498489	3106163	2570439	3034395	1550097	2574992	4170031	3962318	2798950	1929006	2977140	3803111	4614799	2217248	2366674	2572708	1290732	1990175	3614927	3965347	2717823	1629410	3052708
3.4	2971419	1108503	1150845	3025327	3042434	1688669	4184697	2784908	3805309	2766284	3044775	3006640	3153214	7869655	3809298	3495463	2514565	1688669	2821014	4730659	3805309	3027304	3044775	3006640	5638000	4521691	3220233	2651491	3006640	1547944	2555572	4171098	3929299	2796589	1946698	2971419	4210889	4634057	2300000	2288187	2495312	1291317	1986443	3609456	4007880	2766284	1609359	3055312
3.6	2994464	1030704	1171690	3004367	3302903	1687433	4012207	2710402	3831851	2717823	2991098	3031042	3613929	8080621	3816776	3138426	2617092	1687433	2828535	4838180	3831851	2989629	2991098	3031042	6061636	4539743	3568372	2763579	3031042	1540362	2528473	4145847	3950254	2794687	1931641	2994464	3841222	4645026	2518991	2350856	3023542	1292594	1972560	3625931	3955909	2717823	1651454	3023542
3.8	2992882	1081444	1173116	2920131	3030880	1693707	4125429	2752779	3761802	2706865	2997105	3037167	2592857	8278345	3824294	3432222	2611141	1693707	2825675	4809341	3761802	3042509	2997105	3037167	5486000	4528073	3725814	2806263	3037167	1533544	2558573	4129299	3934818	2791669	1944108	2992882	4087000	4638528	2100092	2245862	2842917	1277513	1980143	3651925	3959589	2706865	1615685	3042917
4	2995797	1049419	1157729	3100611	3310792	1699565	4079582	2737134	3828643	2693210	3032197	3020880	3726071	8075793	3824312	3159445	2686766	1699565	2818730	4869864	3828643	3057385	3032197	3020880	5758273	4531336	3531744	2701123	3020880	1537561	2554561	4126611	3937742	2792094	1956005	2995797	4379556	4610671	2300092	2345005	2829479	1284976	1982736	3616297	3967764	2693210	1659225	3029479
4.2	2940666	1036831	1149877	2975109	3192463	1684167	4075994	2739757	3726134	2713771	3052390	2998705	3822143	7781517	3827419	3037037	2553288	1684167	2807953	4763044	3726134	3018501	3052390	2998705	5442091	4500218	3005814	2853088	2998705	1556363	2551898	4125868	3926751	2790889	1938594	2940666	4320333	4652941	2381468	2221780	2617188	1277958	1979190	3609163	3974302	2713771	1653714	3017188
4.4	2984320	1039736	1216532	3038908	3474897	1683491	4191015	2748652	3796988	2712706	3020685	3047126	3091786	7739103	3828276	3389491	2536169	1683491	2814537	4783316	3796988	3009778	3020685	3047126	5709818	4510966	3620465	2836790	3047126	1554862	2589114	4120105	3935603	2771476	1934418	2984320	3726222	4608894	2239908	2394828	2724688	1286565	1987957	3648305	3957037	2712706	1600820	3024688
4.6	2960520	1029472	1131303	3023974	3224721	1684644	4116726	2795405	3815674	2725732	3047307	3033259	3580000	7479655	3835215	3225370	2600027	1684644	2809713	4778965	3815674	3027304	3047307	3033259	5684272	4500970	3361977	2901088	3033259	1511842	2506572	4142918	3931183	2784579	1967868	2960520	4212667	4630631	2443486	2310045	2572812	1291968	1998323	3652249	4049690	2725732	1650448	3092812
4.8	2969133	1108292	1175704	2856856	3080704	1680258	4125042	2770627	3805309	2717823	3005397	2983338	3342143	8021724	3790052	3262315	2423750	1680258	2815753	4870429	3805309	3032513	3005397	2983338	5900000	4489636	3593605	2939930	2983338	1554435	2546131	4137542	3913586	2795890	1948721	2969133	4016000	4607668	2401193	2404338	2665625	1292267	1978357	3618839	3984332	2717823	1615685	3095625
5	2986262	1049982	1070933	2874847	2882786	1689121	4113933	2773323	3831851	2706865	3010798	3015356	3208571	7559172	3802813	3209861	2600462	1689121	2799132	4819749	3831851	3037796	3010798	3015356	5541454	4509268	3668837	2955702	3015356	1542651	2550337	4160555	3930088	2799043	1920428	2986262	3984222	4643726	2436789	2393003	2538229	1284920	1972065	3638253	4061507	2706865	1654339	3088229
5.2	3001066	1185951	1202130	2842576	2810352	1680269	4118274	2752984	3761802	2779837	2977909	3001786	3467500	7763724	3785051	3125695	2485679	1680269	2833495	4705157	3761802	3030553	2977909	3001786	5272455	4477896	3044651	2886246	3001786	1538569	2549061	4114142	4002503	2790425	1936469	3001066	4172778	4588364	2390826	2395028	2627396	1267445	1952565	3605879	3983376	2779837	1654340	3087396
5.4	3001074	1053768	1038503	2711004	2944927	1680290	4117207	2754128	3828643	2717823	3002522	3021690	3239643	7401724	3831762	3175972	2537283	1680290	2800188	4808776	3828643	2995976	3002522	3021690	5258727	4489294	3274302	2957737	3021690	1537619	2506846	4136674	3926149	2795932	1918372	3001074	4241000	4618601	2343211	2451023	2523542	1262194	1972077	3638295	3992769	2717823	1616034	3093542
5.6	2989710	1136972	1151461	2949913	2885836	1681213	4158305	2734071	3828585	2706865	2998858	3006582	3472143	7415103	3803519	3259537	2559456	1681213	2825548	4753598	3828585	2950356	2998858	3006582	5570909	4508227	3076395	2966053	3006582	1546758	2547064	4150366	3925986	2795149	1910405	2989710	3845222	4612780	2278257	2398910	2746042	1266700	1973972	3637123	4004810	2706865	1657211	3086042
5.8	3000541	1162676	1119014	2879389	3107537	1689164	4189299	2735708	3798037	2717823	3039236	3012679	3080714	7299931	3810964	3095695	2568641	1689164	2820938	4714320	3798037	2967528	3039236	3012679	5624909	4489485	3771860	2929965	3012679	1532298	2516326	4124875	3915616	2794687	1937820	3000541	4427111	4605863	2362202	2457197	2359479	1271659	1973916	3602082	3994016	2717823	1656942	3079479
6	3012461	1053257	1093134	2758384	3239091	1681696	4121736	2726830	3823651	2786316	3025647	3013209	2913214	7179379	3811463	2954537	2643288	1681696	2831710	4820450	3823651	2969591	3025647	3013209	5616000	4504896	3913954	2879561	3013209	1522186	2504727	4093557	3928762	2791669	1965314	3012461	4012778	4642156	2374220	2417063	2738021	1268805	1977634	3621925	3962632	2786316	1615685	3098021
6.2	2999011	1116743	1178398	3066681	3268182	1689349	4170031	2694412	3853958	2774465	2985371	3006449	3205000	7099586	3837121	3612824	2519511	1689349	2815911	4729508	3853958	3021261	2985371	3006449	5532545	4454975	3670000	2923439	3006449	1497814	2537698	4150262	3922258	2788950	1913968	2999011	4056000	4643729	2477615	2467987	2627812	1246252	1985763	3633462	3946829	2774465	1652402	3077812
6.4	3010340	1116391	1111461	3096812	3592434	1686214	4171098	2727044	3812621	2757666	2997772	3036188	3317143	7318138	3799354	3305232	2589946	1686214	2781941	4699582	3812621	3021261	2997772	3036188	5622364	4501538	3545233	2831368	3036188	1520954	2571739	4017636	3924784	2796589	1916945	3010340	4407889	4588304	2384312	2486351	2627917	1267828	1934096	3617814	3993567	2757666	1629410	3077917
6.6	3013401	1005440	1140229	2984716	3309003	1687040	4145847	2699447	3797069	2717823	2955278	3013853	2896786	7528069	3794635	3322222	2442120	1687040	2795598	4777992	3797069	2969985	2955278	3013853	5504545	4521554	3296395	2820088	3013853	1539618	2529644	4105010	3910720	2798950	1928192	3013401	3830444	4587837	2131193	2512269	2565833	1248078	1971560	3620199	3987573	2717823	1602131	3065833
6.8	3020329	1085880	1097747	3235284	3507243	1682249	4129299	2735504	3818658	2743956	3032654	3017441	3343929	7281517	3792374	3332408	2545435	1682249	2809089	4766663	3818658	3016721	3032654	3017441	5550637	4472290	3308140	2892386	3017441	1517461	2563061	4058494	3971069	2796589	1920145	3020329	3816333	4573983	2305872	2509410	2817812	1264388	1983596	3616098	3995272	2743956	1657207	3097812
7	2999128	1041232	1102694	3001528	3323900	1681397	4126611	2695628	3829465	2729225	2995065	3028011	3306429	7131172	3821837	3161342	2345951	1681397	2831089	4780136	3829465	3000676	2995065	3028011	5571182	4512903	3668372	2907632	3028011	1508481	2533649	4118588	3997983	2794687	1934158	2999128	3993000	4570768	2410000	2461457	2705312	1265395	1982302	3637029	3970006	2729225	1615685	3085312
7.2	2983964	1126549	1140845	3232271	3329795	1683179	4125868	2715894	3795470	2771440	3063091	3054109	3355357	7133448	3794603	3481667	2399592	1683179	2798268	4754791	3795470	3040953	3063091	3054109	5589545	4490923	3448721	2940175	3054109	1528977	2565776	4111726	3948426	2774687	1932008	2983964	3995444	4589829	2194587	2454483	2287500	1274739	1987371	3611485	3981632	2771440	1658640	3057500
7.4	2970708	1094666	1063503	3039607	3417654	1688921	4120105	2694816	3847631	2662174	3002522	3026444	3317857	6768207	3850020	3445509	2313342	1688921	2836096	4763055	3847631	3017066	3002522	3026444	5441454	4497186	3880000	2959526	3026444	1534292	2547353	4142479	4011716	2781669	1912186	2970708	3932111	4589370	2325688	2360834	2524688	1273319	1979451	3614906	4000688	2662174	1655550	3044688
7.6	3006512	1013081	1154331	2785371	2939238	1693395	4142918	2738635	3835904	2676424	3063889	2984284	3319643	6777448	3786797	3077222	2380598	1693395	2801523	4791872	3835904	3046421	3063889	2984284	5550818	4486542	3516395	3059860	2984284	1514406	2526609	4030690	3966659	2798950	1898689	3006512	3507333	4573146	2470550	2427464	2442083	1254196	1987937	3630858	3999017	2676424	1654376	3042083
7.8	3012522	1008803	1040106	3129432	3370410	1691363	4137542	2711707	3821548	2657029	3044775	3020110	3778571	6917931	3810000	3331250	2363831	1691363	2820488	4853609	3821548	2993115	3044775	3020110	5994091	4470427	3704302	2946825	3020110	1506499	2534906	4058546	4014206	2796589	1931206	3012522	4306444	4548561	2583394	2347508	2277083	1268555	1973587	3646715	3960436	2657029	1650731	3057083
8	3015243	1041303	1133345	3226114	3224135	1683464	4160555	2751974	3771262	2722471	2991098	3031227	2929286	7098965	3832865	3252454	2358967	1683464	2756746	4682877	3771262	2978660	2991098	3031227	5304272	4500787	3849767	2942807	3031227	1502423	2563598	3989174	4039542	2798950	1903239	3015243	4502333	4606727	2522477	2506852	2133438	1254119	1996340	3603776	3985730	2722471	1611816	3083438
8.2	2964243	1066954	1093768	3120000	3446129	1698309	4114142	2693799	3807050	2706865	2997105	3006753	3292143	6959103	3815992	3318704	2407690	1698309	2830800	4779885	3807050	3061545	2997105	3006753	5594909	4502201	3404302	2854193	3006753	1501427	2532787	4029090	4021563	2796589	1918338	2964243	3790778	4589145	1950917	2394550	2559792	1270670	1970345	3645670	3958944	2706865	1616034	3059792
8.4	2996093	1035405	1039912	3125983	3512317	1686553	4136674	2702221	3788570	2675797	3032197	3025819	3603214	6748965	3808290	3358333	2406794	1686553	2772012	4800387	3788570	2965019	3032197	3025819	5607455	4538110	3796628	2792105	3025819	1490305	2557848	4052322	3961868	2794687	1919833	2996093	3919111	4640276	2293761	2478120	2408542	1278113	1987431	3614613	4007738	2675797	1615685	3098542
8.6	2990667	1047253	1104155	3194629	3493226	1682276	4150366	2714453	3739630	2676555	3052390	3044084	3246429	6696552	3837880	3298889	2555000	1682276	2811408	4771255	3739630	3001716	3052390	3044084	6041091	4468127	3449884	2836386	3044084	1522437	2572976	4018441	3925986	2791669	1908461	2990667	4297444	4571604	2585229	2486663	2616667	1277495	1976367	3623724	3992754	2676555	1602601	3086667
8.8	2988476	934789	1082130	3243319	3708592	1683715	4124875	2737920	3726134	2718687	3032654	3041456	3103571	6719448	3810151	3342408	2402935	1683715	2782826	4805387	3726134	3021261	3032654	3041456	5501909	4541470	3688954	2894281	3041456	1502100	2560528	4022814	3915616	2792094	1926928	2988476	4252889	4625873	2234771	2434472	2653646	1297343	1978475	3643128	3964429	2718687	1629410	3053646
9	2954992	999542	1090757	2976507	3054780	1686484	4093557	2734528	3796988	2687377	2995065	3044882	3160000	6859724	3809240	3167963	2474130	1686484	2829342	4783473	3796988	3017727	2995065	3044882	5507091	4500137	3909884	2815807	3044882	1502859	2574992	3970262	3928762	2790889	1913413	2954992	3968556	4618826	2453670	2451969	2427292	1263150	1988889	3627375	4002402	2687377	1616299	3097292
9.2	2969278	1022394	1095634	3224236	3489795	1687669	4150262	2732637	3815674	2771440	2947170	3043408	2832143	6684138	3805805	3156898	2543804	1687669	2782310	4744268	3815674	3042509	2947170	3043408	5578909	4518220	3058488	2799702	3043408	1522914	2555572	4015199	3925986	2771476	1913282	2969278	4330667	4600688	2325229	2476418	2365521	1289063	1978535	3631506	3961703	2771440	1616034	3065521
9.4	2971956	1058856	1143521	3089607	3355337	1681980	4017636	2673112	3805309	2755475	2954255	2966077	3548214	6456276	3830834	3163333	2390516	1681980	2772386	4787793	3805309	3057385	2954255	2966077	5444182	4496941	3659884	2803860	2966077	1502419	2528473	3978170	3915616	2784579	1883651	2971956	4125667	4590557	2472569	2471201	2243854	1278744	1982712	3653724	3999637	2755475	1615685	3043854
9.6	2983192	1090141	1122588	3018777	3397419	1688260	4105010	2717735	3831851	2738495	3063650	2984902	2963214	6927241	3794978	3409398	2554946	1688260	2810648	4766370	3831851	3018501	3063650	2984902	5289363	4483491	3426512	2751017	2984902	1526021	2558573	3997782	3928762	2795890	1935951	2983192	3864889	4549199	2293119	2426263	1998125	1279978	1966122	3610764	4050297	2738495	1600426	3058125
9.8	2980669	1075651	1227764	3248646	3293021	1684151	4058494	2707388	3761802	2775887	3041886	3029945	3708929	6518414	3842932	3295417	2504049	1684151	2823771	4771945	3761802	3009778	3041886	3029945	5414182	4543585	3780349	2594474	3029945	1523846	2546131	4089226	3922258	2799043	1918338	2980669	4247111	4560953	2264404	2501468	2269583	1310168	1983964	3607740	3980391	2775887	1650343	3069583
10	3009369	1143732	1120053	3059869	3242551	1687135	4118588	2741425	3828643	2756973	3049743	2978948	3644643	6826414	3850149	3118055	2442989	1687135	2801211	4775377	3828643	3027304	3049743	2978948	5495728	4508140	3626860	2546579	2978948	1485038	2550337	4041475	3924784	2791658	1930722	3009369	3816555	4609783	2303119	2460901	2174688	1272714	1974550	3600648	3992283	2756973	1606871	3064688
10.2	2981166	1035334	1124137	3153275	3313754	1689183	4111726	2725747	3828585	2717823	3044775	2981951	3111429	6629241	3824361	3058472	2303913	1689183	2801302	4741778	3828585	3032513	3044775	2981951	5235818	4524540	3003954	2494456	2981951	1502664	2549061	4036433	3970019	2798950	1926374	2981166	4047778	4578713	2454404	2430768	2365000	1279529	1987950	3614937	3992303	2717823	1608567	3065000
10.4	2957519	1113961	1131796	3202969	3259472	1689359	4142479	2732101	3798037	2768810	2991098	2954012	3723929	6962621	3838487	3066759	2450000	1689359	2801504	4844038	3798037	3000676	2991098	2954012	5104727	4499328	3848488	2731316	2954012	1493933	2506846	4085983	3947476	2796589	1933171	2957519	4200111	4583520	2341284	2464983	2201979	1258399	1986687	3605471	3984173	2768810	1605542	3091979
10.6	2985865	1011180	1060757	3006375	3383988	1681980	4030690	2726830	3823651	2764059	2997105	2984575	3010000	6499655	3832287	3524028	2510408	1681980	2795160	4822678	3823651	3040953	2997105	2984575	5422545	4512814	3635233	2869474	2984575	1504952	2547064	4077019	3981146	2794687	1928794	2985865	3882111	4573661	2190000	2430634	2404167	1282089	1996457	3614927	4029529	2764059	1610570	3084167
10.8	3004452	1021021	1090299	2978559	3633167	1688260	4058546	2769502	3853958	2709638	3032197	3011361	3245000	6422138	3844056	3494167	2346766	1688260	2794767	4850920	3853958	3017066	3032197	3011361	5370818	4506298	3435698	2737421	3011361	1496749	2516326	4063337	3944292	2771669	1919375	3004452	3934667	4554551	2216330	2331379	2241354	1308699	1959973	3609456	3992460	2709638	1604304	3091354
11	3013864	1085898	1142183	3290917	3470381	1684151	3989174	2746352	3812621	2712780	3052390	2986920	3484286	6669931	3841684	3424398	2293342	1684151	2767842	4818933	3812621	3046421	3052390	2986920	5368000	4546330	3966977	2850281	2986920	1484807	2504727	4065063	3942931	2778950	1938063	3013864	3830111	4591771	2165505	2304928	2389271	1298817	1975647	3625931	4022400	2712780	1655225	3089271
11.2	2997071	980423	1144296	2946987	3638065	1687135	4029090	2718499	3797069	2668801	3020685	3000643	2600000	6451172	3813445	3534908	2575326	1687135	2792545	4780596	3797069	2993115	3020685	3000643	5439636	4500123	3000116	2749860	3000643	1499645	2537698	4022061	3964283	2796589	1956182	2997071	3913889	4558000	2228624	2311346	2044583	1285431	1979399	3651925	3991623	2668801	1651537	3084583
11.4	2971448	1068134	1079894	2905502	3631349	1689183	4052322	2713820	3818658	2712307	3047307	2963103	3226786	6507310	3826874	3248009	2355951	1689183	2770188	4789895	3818658	2978660	3047307	2963103	5453273	4519245	3839767	2647807	2963103	1510166	2571739	4061820	3976938	2796589	1941460	2971448	3715111	4531671	2133945	2326240	2390625	1266307	1987446	3616297	3969901	2712307	1620849	3090625
11.6	2992490	1010334	1128011	3047904	3735777	1689359	4018441	2686428	3829465	2654533	3005397	2989109	3433571	6773793	3846628	3281204	2283669	1689359	2802298	4730701	3829465	3061545	3005397	2989109	5344545	4529505	3517325	2856351	2989109	1460979	2529644	4099571	3960064	2774687	1927008	2992490	4135444	4609651	2207890	2423370	2436042	1295215	1978701	3609163	4052210	2654533	1629410	3096042
11.8	2943104	1001232	1146989	2879694	3244076	1688669	4022814	2723162	3795470	2708579	3010798	3016304	3751786	6500069	3811268	3222037	2505109	1688669	2764968	4791015	3795470	2965019	3010798	3016304	5164818	4516883	2856395	2869316	3016304	1483835	2563061	4051914	3955868	2781669	1907936	2943104	3918889	4566287	2099266	2465395	2580417	1261952	1990175	3648305	4010374	2708579	1656776	3080417
12	2994958	1132007	1140088	3022445	3033695	1687433	3970262	2689619	3847631	2693165	2977909	2999898	2921429	6452207	3851508	3169630	2332717	1687433	2777164	4716726	3847631	3001716	2977909	2999898	5532091	4512569	4076512	2944263	2999898	1517793	2533649	4041559	3910479	2798950	1921371	2994958	4328222	4581479	2139633	2505339	2469583	1298250	1986443	3652249	3945199	2693165	1613765	3099583
12.2	2993086	1037253	1151092	2921004	3149208	1690579	4015199	2723031	3835904	2754109	3039236	3006648	3391429	6760414	3833044	3362454	2330788	1690579	2789697	4825042	3835904	3021261	3039236	3006648	5767545	4492651	3913954	2927421	3006648	1484344	2565776	4070722	3899091	2796589	1952071	2993086	4305667	4585680	2377982	2453448	2433542	1285400	1972560	3618839	3999856	2754109	1615685	3093542
12.4	3019225	1135282	1116144	2916943	2950616	1683158	3978170	2714537	3861881	2731052	2998858	3000592	2931429	6580690	3849234	3388611	2385109	1683158	2777138	4783065	3861881	3059149	2998858	3000592	5200728	4483562	3483721	2913684	3000592	1509727	2547353	4095293	3868867	2798950	1948800	3019225	4154556	4591031	2463670	2425962	2438646	1300141	1980143	3638253	3954958	2731052	1627888	3098646
12.6	2995995	1066532	1145423	3141092	3077566	1698309	3997782	2686709	3819600	2676424	2954872	3003060	3189643	5968690	3808176	3199167	2291929	1698309	2796653	4859561	3819600	3036944	2954872	3003060	5742818	4505415	3605465	3079614	3003060	1505354	2572976	4055607	3946388	2796589	1938226	2995995	3764445	4612173	2484037	2563515	2250833	1272172	1982736	3605879	4046807	2676424	1605502	3090833
12.8	3012921	1084930	1133345	2642227	2937654	1686553	4089226	2691824	3856906	2657029	3012838	2986031	3039286	6044690	3775830	3632454	2366277	1686553	2803208	4796789	3856906	3005147	3012838	2986031	5117545	4551735	2959302	2918526	2986031	1496477	2560528	4027563	3916534	2794687	1908852	3012921	3713000	4543334	2223670	2463293	2173750	1276247	1979190	3638295	4003427	2657029	1605830	3093750
13	3003595	954331	1084049	2988297	3140997	1682276	4041475	2718009	3853958	2722471	2965863	3067973	3327857	6451517	3836938	3055092	2270408	1682276	2778166	4854268	3853958	3046456	2965863	3067973	5661000	4491396	3757325	3054000	3067973	1491105	2574992	4076538	3936323	2791669	1937107	3003595	4212889	4574121	2313945	2504583	2546667	1282945	1987957	3637123	3897364	2722471	1600364	3046667
13.2	2985580	1053416	1101408	2823057	3354457	1683715	4036433	2708943	3812621	2706865	2950541	3016998	2793929	6609241	3838389	3409861	2411929	1683715	2806570	4738023	3812621	3021261	2950541	3016998	5468091	4494639	3526628	2927281	3016998	1453873	2555572	4023651	3966106	2792094	1919944	2985580	3873556	4563031	2363486	2546730	2339375	1239052	1998323	3602082	3969671	2706865	1602987	3099375
13.4	2981812	1081778	1049683	2948865	3175513	1686484	4085983	2689892	3797069	2675797	2964004	2992246	3318929	6303793	3840983	3317732	2410679	1686484	2786316	4835209	3797069	3049894	2964004	2992246	5649000	4537886	3345000	2917245	2992246	1484556	2528473	4050408	3941299	2790889	1937017	2981812	4180000	4588658	2381743	2560133	2464583	1273587	1978357	3621925	3998519	2675797	1608596	3064583
13.6	2944518	1022958	1143416	3012227	3066041	1687669	4077019	2684190	3818658	2676555	2937218	2979444	3243929	6296000	3825327	3413287	2640924	1687669	2766808	4810262	3818658	3050666	2937218	2979444	5124182	4529544	3672093	2794807	2979444	1502605	2558573	4127782	3946663	2771476	1945552	2944518	3850889	4598591	2412018	2556007	2365208	1298791	1972065	3633462	3998136	2676555	1629410	3065208
13.8	2979098	1181761	1086039	2768472	3015367	1681980	4225952	2692836	3829465	2706865	2948084	2961289	2746429	6207517	3823491	3695046	2465245	1681980	2814465	4790648	3829465	3051965	2948084	2961289	5756727	4492618	3394302	2886053	2961289	1479265	2554561	4025690	3977854	2784579	1948404	2979098	3872778	4582008	2509450	2409121	2411979	1296792	1952565	3617814	3972958	2706865	1616034	3071979
14	2946857	1054049	1120035	2826375	3092727	1688260	4197521	2686400	3795470	2738495	2991126	3005401	3057500	6534483	3811531	3477130	2551848	1688260	2760670	4702186	3795470	3036020	2991126	3005401	5496545	4512763	4342093	2890474	3005401	1482938	2551898	4061391	3956558	2795890	1934649	2946857	4071333	4583869	2340367	2418888	2192188	1277543	1972077	3610377	4034919	2738495	1615924	3092188
14.2	2983448	1034912	1080475	2941092	2813343	1684151	4261517	2673684	3796134	2717823	3013032	2982567	3588571	6549793	3809915	3324259	2339620	1684151	2790603	4781255	3796134	3052055	3013032	2982567	5180637	4529508	3765581	3084035	2982567	1481186	2589114	4090743	3961372	2799043	1892934	2983448	3984000	4585407	2506697	2590968	2493125	1238486	1973972	3618243	3976609	2717823	1622818	3093125
14.4	2961468	998609	1195599	2769301	3159560	1687135	4174927	2685573	3796988	2756973	2996197	2985401	2985000	5758896	3850366	3673380	2432908	1687135	2774626	4821297	3796988	3021261	2996197	2985401	5614182	4522459	3130581	3019579	2985401	1485487	2506572	4084289	3954478	2790425	1932675	2961468	3787444	4568759	2453578	2566029	2481875	1276269	1973916	3607740	3957280	2756973	1639436	3081875
14.6	2974993	1059296	1069701	2926856	2889971	1689183	4174791	2664545	3815674	2717823	3003318	2979882	4031071	5906965	3821992	3429167	2563397	1689183	2815390	4760188	3815674	3088350	3003318	2979882	5380818	4566542	3876628	2874737	2979882	1471340	2546131	4007897	3983823	2795932	1961743	2974993	3843667	4607962	2512752	2496841	2408854	1250208	1977634	3600648	3954072	2717823	1657256	3078854
14.8	2990972	1093486	1134437	2741135	2955513	1689359	4072667	2688901	3805309	2768810	2994246	3007010	3401786	6341931	3846777	3885602	2389837	1689359	2789054	4882793	3805309	3030236	2994246	3007010	5054546	4517555	3905930	2957088	3007010	1464785	2550337	4042416	3944954	2795149	1920641	2990972	3515000	4566772	2023394	2564338	2476250	1276405	1985763	3614937	3970222	2768810	1615685	3076250
15	2957915	967095	1070194	2914716	3365807	1688669	4050565	2666825	3831851	2764059	3028583	2982006	2986429	6150000	3819999	3429028	2533804	1688669	2769919	4663609	3831851	3060956	3028583	2982006	5327909	4495002	2934186	2825649	2982006	1498654	2549061	4084352	4013771	2794687	1963058	2957915	3819333	4630563	2401376	2543404	2162917	1274335	1934096	3605471	3952501	2764059	1659070	3062917
15.2	2973701	1083838	1081813	2953755	3103314	1687433	4158232	2686252	3761802	2709638	3003227	3006310	3014643	6099517	3832548	3402778	2368397	1687433	2780309	4818347	3761802	3021261	3003227	3006310	5434363	4561580	3556395	2889702	3006310	1468596	2506846	4092500	3994681	2791669	1955011	2973701	4196333	4640368	2357064	2438810	2497083	1270090	1971560	3614927	3916635	2709638	1609359	3097083
15.4	2985195	1018433	1180951	3035764	3326921	1693707	4168933	2675090	3828643	2712780	3042314	2991404	2826071	6347448	3807168	3483611	2445380	1693707	2774738	4767490	3828643	3042666	3042314	2991404	5253182	4490279	3592558	2662755	2991404	1456086	2547064	4081454	3977065	2788950	1970541	2985195	3842778	4626415	2405780	2521969	2521146	1266739	1983596	3609456	3948364	2712780	1608596	3071146
15.6	2982385	1048134	1079965	2718603	2886598	1686553	4089697	2687575	3793558	2668801	3007982	3006662	3112500	6317931	3866559	3310370	2400435	1686553	2803779	4744791	3793558	3063565	3007982	3006662	5448546	4512603	3685698	2602439	3006662	1459769	2516326	4004006	4039542	2796589	1953171	2982385	4113889	4611733	2237339	2443215	2557500	1246841	1982302	3625931	3948587	2668801	1629410	3057500
15.8	2987550	1017271	1181954	2951747	3195543	1682276	3988525	2667953	3849826	2712307	3030336	2968461	3447857	6153242	3827168	3212408	2515245	1682276	2754361	4866674	3849826	3010373	3030336	2968461	5140637	4509028	3691512	2658702	2968461	1469002	2504727	4076580	4021563	2798950	1953024	2987550	4396000	4623363	2383027	2307564	2473646	1262838	1987371	3645670	3944532	2712307	1627888	3073646
16	2977973	966338	1132764	3066026	3384399	1683715	4184697	2659224	3877186	2654533	3040863	3041985	3568571	6384207	3837656	3255417	2295734	1683715	2780017	4597782	3877186	3001627	3040863	3041985	4609091	4544799	2604535	2787404	3041985	1468521	2537698	4021454	3961868	2796589	1969871	2977973	3825778	4650997	2469908	2460267	2377292	1238358	1979451	3614613	3953090	2654533	1605502	3077292
16.2	2956755	1136461	1115863	2740917	3010499	1686484	4159718	2656659	3836143	2708579	3030803	3052542	3388214	6188690	3811260	3299074	2278424	1686484	2752605	4766015	3836143	2986313	3030803	3052542	5419909	4572432	3844419	2888140	3052542	1484852	2571739	4025094	3925986	2794687	1960631	2956755	3807667	4633253	2363670	2449722	2535104	1253877	1987937	3623724	3983735	2708579	1605830	3075104
16.4	2941212	1022218	1147236	3137511	3364282	1687669	4204111	2638011	3795470	2693165	3002522	3023349	2910714	6322345	3888878	3403889	2460000	1687669	2750739	4753933	3795470	3033789	3002522	3023349	5418182	4524580	3377442	2990912	3023349	1434977	2529644	4011297	3915616	2774687	1970951	2941212	4587000	4616227	2475321	2521758	2386667	1233727	1973587	3643128	3935708	2693165	1600364	3086667
16.6	2973742	1081109	1184577	2881747	3064193	1681980	4161977	2709554	3847631	2754109	2998858	3025200	3225714	5803586	3862708	3101945	2347419	1681980	2752653	4759738	3847631	2950047	2998858	3025200	5632636	4535202	3335465	2935421	3025200	1459178	2563061	4059854	3928762	2781669	1974830	2973742	4200889	4606431	2321743	2515083	2321875	1247561	1996340	3627375	3931146	2754109	1602987	3081875
16.8	2961556	971549	1178944	2936507	3258768	1688260	4107605	2638871	3835904	2731052	2954872	3005898	3265000	6008552	3848107	3191158	2362473	1688260	2783657	4758232	3835904	2947516	2954872	3005898	5513546	4506158	4009767	2920211	3005898	1455224	2533649	4088640	3925986	2798950	1939197	2961556	4104889	4601195	2289817	2559455	2553229	1273731	1970345	3631506	3960578	2731052	1608596	3053229
17	3006603	984225	1157535	3156375	3225279	1684151	4058452	2656183	3821548	2738495	3012838	2994943	3154286	6224345	3871215	3425880	2418206	1684151	2760030	4804184	3821548	3016494	3012838	2994943	5331818	4537879	3138372	2975263	2994943	1459408	2565776	4056433	3915616	2796589	1960579	3006603	3903000	4607730	2613028	2433204	2391771	1256790	1987431	3653724	3928508	2738495	1629410	3091771
17.2	2984843	990845	1200581	3115546	3446774	1687135	3956621	2632748	3771262	2706865	2965863	2976500	3420000	5931931	3829163	3432315	2326060	1687135	2806454	4787563	3771262	2924375	2965863	2976500	5203182	4489923	3772442	2882526	2976500	1464796	2547353	4078410	3928762	2798950	1972567	2984843	4034000	4596677	2489817	2489833	2238854	1264824	1976367	3610764	3989501	2706865	1616034	3038854
17.4	2987169	976655	1137218	3005721	3633724	1689183	4068075	2649506	3807050	2756973	2950541	3003168	3083571	6230621	3847134	3522824	2439130	1689183	2784364	4826025	3807050	2920022	2950541	3003168	4748182	4487968	3672442	2994649	3003168	1448350	2526609	4015701	3922258	2796589	1957553	2987169	3903222	4550017	2703028	2485973	2208750	1235641	1978475	3607740	4001881	2756973	1615924	3088750
17.6	2977149	1048275	1154173	2949651	3391877	1689359	3878557	2655915	3788570	2725626	2964004	3012383	3240714	6206138	3834330	3416805	2347554	1689359	2791205	4739728	3788570	2969323	2964004	3012383	5783273	4544305	2412093	2958789	3012383	1462660	2534906	4090795	3924784	2794687	1926206	2977149	3963778	4600467	2889449	2565473	2126875	1244844	1988889	3600648	4013875	2725626	1622818	3066875
17.8	2963735	1033310	1081056	3097686	3298065	1681980	4114770	2648127	3739630	2768810	2937218	2993122	3360714	6140000	3857826	3746389	2305815	1681980	2772481	4816852	3739630	3024014	2937218	2993122	5476727	4513268	3476977	3013702	2993122	1463583	2563598	4002657	3970019	2791669	1949731	2963735	3619111	4554226	2297523	2649577	2614375	1214877	1978535	3614937	3936553	2768810	1600364	3094375
18	2972291	1034789	1081655	3150917	3163930	1688260	4017542	2642924	3726134	2764059	2948084	3014463	3238214	5954897	3851022	3992176	2250109	1688260	2760331	4827375	3726134	3029510	2948084	3014463	5416909	4511901	3475116	3015789	3014463	1432552	2532787	4089644	3946388	2792094	1941512	2972291	3775222	4592892	2588349	2517608	2368646	1245097	1982712	3605471	3977132	2764059	1602987	3068646
18.2	2978362	1051303	1126831	3162184	3337126	1684151	4110199	2659908	3796988	2709638	2991126	2999505	2974286	5849103	3882344	3727408	2501196	1684151	2790942	4828211	3796988	3038834	2991126	2999505	5360182	4550575	3440465	3100193	2999505	1460642	2557848	4080115	3916534	2790889	1913329	2978362	4048111	4595368	2413027	2540289	2397708	1251700	1973972	3614927	4012174	2709638	1608596	3097708
18.4	2993666	990845	1050933	3024061	3367713	1687135	4011663	2708212	3815674	2712780	3013032	3008581	3342143	6111517	3862935	3875370	2594674	1687135	2765692	4688849	3815674	3082605	3013032	3008581	4898182	4565782	3482209	3084737	3008581	1462515	2563061	4040690	3936323	2771476	1916293	2993666	4180222	4565375	2571927	2617019	2129375	1229736	1973916	3609456	3967022	2712780	1629410	3029375
18.6	3031530	1124120	1202518	3095895	3220762	1689183	4019540	2723585	3805309	2668801	3044775	2976194	3120714	6358483	3831191	3781759	2613641	1689183	2769786	4848379	3805309	3033319	3044775	2976194	5326182	4589617	3095465	3014105	2976194	1445323	2533649	4010042	3983823	2784579	1887306	3031530	3866111	4553628	2478532	2522925	2134688	1250820	1977634	3625931	4057452	2668801	1616034	3084688
18.8	2978221	1049243	1097166	3172664	3405982	1689359	4011517	2657252	3831851	2712307	2991098	3007307	2967857	6075724	3861103	3902454	2491984	1689359	2745831	4810031	3831851	3077295	2991098	3007307	5244091	4623815	3765814	2971070	3007307	1457662	2565776	4052814	3925986	2795890	1903886	2978221	3788111	4581346	2405780	2475873	2355521	1224471	1985763	3651925	4015764	2712307	1615924	3075521
19	2964453	1065616	1083803	2884934	3224487	1688669	4110293	2674733	3798037	2654533	2997105	3036964	3186429	6147103	3837503	4017963	2507500	1688669	2765224	4732573	3798037	2956927	2997105	3036964	5456909	4563309	3446046	3116860	3036964	1440390	2547353	4094080	3915616	2799043	1935659	2964453	4117667	4588065	2278440	2578276	2428542	1254965	1934096	3616297	3977521	2654533	1622818	3088542
19.2	2979305	1050581	1065827	3134629	3472874	1687433	4113305	2623892	3823651	2708579	3032197	3012855	2977857	6048828	3884626	3650139	2506522	1687433	2726127	4844195	3823651	2990904	3032197	3012855	5316818	4558569	3007791	2915597	3012855	1451567	2572976	4030262	3928762	2774687	1926254	2979305	3955000	4591367	2506697	2509644	2410938	1220527	1971560	3609163	4050718	2708579	1616034	3090938
19.4	2981490	1003803	1076408	3164017	3719736	1690579	4094676	2666275	3853958	2693165	3052390	3000429	2869643	6242000	3878346	3745555	2606794	1690579	2785916	4720429	3853958	2917007	3052390	3000429	5642545	4518199	3980349	2918526	3000429	1465502	2560528	4049707	3922258	2771669	1919352	2981490	4494222	4569915	2307156	2580857	2471562	1249160	1983596	3607291	4009708	2693165	1615685	3071562
19.6	2961178	1037236	1186725	3088472	3371144	1681213	4123347	2603797	3812621	2754109	2832654	3024764	2898929	5808828	3895305	3860555	2553451	1683158	2734996	4816130	3812621	2982926	3032654	3024764	4885727	4595227	3516628	2963789	3024764	1442310	2574992	4008828	3924784	2784579	1956440	2961178	3854556	4555299	2323853	2579922	2355938	1288534	1934096	3622019	3935708	2754109	1654066	3095938
19.8	2981574	1079084	1094507	3142140	3297918	1689164	3989801	2658773	3797069	2731052	2889104	3019807	2480357	6123242	3853838	3902454	2515245	1698309	2778702	4791433	3797069	3006449	2992923	3026238	5126545	4576794	4120233	2886176	3026238	1448595	2555572	4041883	3923988	2795890	1942558	2981574	3957111	4547553	2542110	2606285	2171875	1261534	1971560	3610377	3972958	2731052	1656436	3071875
20	3011148	974032	1139577	2996288	3300352	1681696	4233075	2649724	3770456	2676424	2896199	2991799	3045714	6036138	3887464	3727408	2495054	1686553	2765193	4938023	3818658	2956024	2974325	3024954	5402545	4519079	4070116	2862947	3024954	1550564	2574413	4190858	4058465	2799043	1953766	3111148	3950444	4600467	2638257	2619310	2258125	1209600	1993730	3618243	4034919	2676424	1619341	3098125
20.2	2800169	1153750	1055000	2944149	3024692	1600349	3949320	2600771	3776968	2700052	2866696	2987517	3274643	6319586	4014593	3875370	2410679	1768289	2812211	5042218	4211666	3151167	3164139	3049618	5641545	4685482	4494419	2924842	3049618	1641392	2627742	4464362	4021176	2790425	2009597	3231266	4075667	4715150	2588349	2869911	2213646	1244074	1983803	3678619	4031913	2676424	1718520	3123646
20.4	2900598	990845	1078785	3000271	3000754	1600014	4000789	2701211	3780014	2606865	2874445	2996385	2532143	6224828	4258189	4017963	2640924	1762020	2919358	5196768	3989443	3595631	3358590	3054727	5136454	4606116	3421046	2876053	3054727	1592346	2564249	4347929	4170174	2791669	2043759	3121471	4070778	4683799	3111560	2751535	2187500	1226613	2003833	3766287	3977947	3022707	1651640	3387500
20.6	2941212	1010511	1065018	2883886	3001261	1600040	3908274	2601302	3733191	2652079	2909155	2988914	2817143	6463517	4280199	3650139	2641766	1795871	2958600	5288096	3955818	3593311	3318812	3343064	5780091	4650696	3724884	2681737	3043064	1599772	2634192	4285471	4115407	3202133	2030985	3124975	4015111	4695692	3673211	2634038	2179167	1240206	2051095	3720962	4018121	2886359	1636233	3279167
20.8	2963535	983222	1088099	3000983	3300044	1600249	3931527	2601504	3702146	2602940	2900705	2987139	3396071	7184069	4273539	3834213	2773152	1851994	2971011	5032165	3977998	3657282	3320148	3248942	6090364	4626342	3745698	2881035	3148942	1580834	2584033	4160533	4002083	3217826	2030620	3193535	3771555	4720664	4279358	2659611	2460521	1238784	2054440	3681485	3989813	2752079	1625704	3260521
21	2900440	970951	1093961	3000799	3303079	1601397	3986234	2700160	3700901	2642956	2806895	2987371	2675714	7112759	4280987	4404491	2994864	1851346	2944087	4871119	3900602	3514973	3202262	3197823	6106364	4653508	3196628	2871649	3097823	1560241	2565169	4048954	4055659	3226193	1973271	3096440	5188444	4709273	3007890	2638131	2662917	1245555	2039603	3667563	3962049	2742956	1615450	3262917
21.2	2900058	1027482	1115440	3000638	3300273	1603179	3953086	2600767	3701079	2628102	2820641	2934497	3623571	7733793	4298410	4232917	2817826	1745871	2778531	4739738	3963260	3313534	3211258	3175471	6196454	4664716	4145000	2889228	3075471	1529594	2577037	4132092	3904094	3243591	1910743	2989058	4801667	4730388	2937706	2592737	2594062	1256858	1990358	3614634	3972391	2728102	1591379	3094062
21.4	2955698	1048451	1008627	3000358	3300625	1608921	3942458	2594460	3700534	2632365	2854671	2971920	3370714	8236689	4271590	4220139	3012119	1761994	2770753	4823902	3926872	3104736	3127453	3210687	6795546	4609892	4126860	2950316	3010687	1506393	2555872	4102395	3996339	3210976	1972103	2955698	4862778	4743158	3007156	2631646	2691562	1298582	1955077	3562176	3988583	2732365	1585255	3091562
21.6	2982452	971549	1177377	2647642	2900979	1613395	3849163	2601119	3700817	2625626	2865821	2956229	2575714	8150690	4293924	4350787	2739538	1751346	2803067	4817197	3933427	3137473	3168272	3293095	6198364	4671617	4334070	2950474	2993095	1495260	2513919	4156339	3946121	3247211	1937281	2982452	5209667	4694088	2759541	2522025	2854062	1297483	1993326	3590533	4032386	2725626	1589333	3094062
21.8	2997492	984225	1049542	2787686	2909531	1611363	3934362	2621069	3710546	2622837	2802780	2970817	3708571	8632897	4311251	4499815	2830326	1667044	2751804	4805680	3916295	3340556	3238076	3217794	6329818	4627422	4847442	3018088	3017794	1457396	2577847	4137531	3905457	3235352	1951059	2997492	4261889	4698843	2829174	2398632	3061667	1309739	1976507	3562176	3974315	2722837	1581178	3161667
22	3016623	1006937	987236	2774410	2770792	1603464	3939027	2700422	3720058	2612645	2862703	2933669	2500357	9939172	4332963	4712408	2663587	1652564	2761249	4906423	3899207	3215690	3352577	3183024	7063546	4622647	4006163	2968824	2983024	1423917	2506875	4154571	3949847	3272566	1932659	3016623	4058222	4690878	2979633	2456974	2954375	1246941	2023194	3562176	3954365	2712645	1562796	3154375
22.2	2993028	1037218	1064965	2832576	3079355	1648309	4069833	2720982	3828918	2703708	2999021	2957359	3777143	10168414	3898303	4961667	2441386	1660387	2763971	4825021	3845909	3203492	3053909	3102577	7531000	4646051	5487442	3028070	3002577	1465831	2538544	4106998	3985145	3018000	1943587	2993028	4493445	4698548	2903762	2559355	2654792	1239253	1989447	3562176	3933180	2703708	1564753	3154792
22.4	2994961	1004419	1041637	2970699	2964282	1686553	3981527	2747626	3837631	2689733	2996726	2976132	3054643	9852207	3928959	4736065	2519837	1612012	2761045	4797521	3814786	3075305	2908615	3000340	7539454	4624124	6671047	2860052	3000340	1448031	2506809	4171370	3940537	3188950	1964679	2994961	4477667	4637985	2946881	2470845	2858646	1233685	1996942	3583734	3964079	2689733	1592921	3158646
22.6	2988211	1075563	1104789	2969913	2981965	1682276	4186538	2734711	3841750	2706865	2957840	2978991	5295357	9391655	3920705	4764259	2466250	1610459	2747437	4667699	3895145	2915687	2958462	2985841	7196454	4623167	6903605	3049246	2985841	1462485	2528803	4172782	3937596	3131926	1951519	2988211	4203333	4631512	3033119	2495484	2889271	1243217	1971097	3562176	3984319	2706865	1571324	3189271
22.8	2981021	974173	1086584	2947686	3157654	1683715	3897103	2790898	3887555	2731052	3012290	2945372	6438214	8402483	3875578	4960695	2491658	1625430	2743209	4835408	3809011	3021261	2992923	2999053	6326909	4616487	7537791	3032298	2999053	1455314	2531834	4102197	3986246	3147870	1937757	2981021	4438556	4611704	2763670	2527686	2924167	1210591	1987228	3562176	3988246	2731052	1562834	3124167
23	3002519	1085687	1113539	2769476	3064340	1686484	4247992	2821014	3882569	2709638	3028014	2963212	5975000	8327862	3911247	5115509	2582962	1606844	2790724	4874467	3678495	3042666	2989104	3015063	6090909	4612472	5941628	2941719	3015063	1456260	2492559	4144603	3927783	2966535	1939273	3002519	3688111	4631418	2741835	2615973	2813646	1260783	2006881	3515397	3943632	2709638	1545060	3113646
23.2	2993926	1002447	1061743	2841048	3185777	1687669	4087688	2828535	3839529	2708579	2966003	2947170	5767857	7797310	3870459	5120555	2613696	1616504	2749278	4929571	3681935	3063565	2996199	3019807	6023727	4574393	7325117	2893983	3019807	1446338	2480469	4126213	3967381	2862729	1953649	2993926	3811333	4614708	2690367	2587253	3089896	1228017	1982751	3562176	3967796	2708579	1551676	3089896
23.4	3010949	1039032	1142289	2848297	2912287	1681980	4094665	2825675	3928658	2708579	2977372	2971347	5987500	7887655	3921955	5914445	2603206	1630947	2732495	4880837	3718056	3010373	2966696	2991799	5241909	4524122	6528605	3006281	2991799	1460506	2471082	4176255	3781337	2791721	1925444	3010949	3663445	4616918	2820092	2640812	2806562	1252661	1977164	3605178	3974334	2708579	1536789	3106562
23.6	2995105	1058398	1066197	2895371	3208944	1688260	3989738	2818730	3917226	2717823	3028641	3012094	4932500	7610690	3917540	6626435	2557772	1581307	2724897	4821747	3640933	3001627	2974445	2987517	5353000	4553474	4911163	3037755	2987517	1447404	2500500	4060125	3760069	2792847	1921302	2995105	3792778	4649352	2369908	2602725	3003854	1239547	1995104	3562176	3964739	2717823	1530995	3103854
23.8	2968694	1030845	1115863	2791485	3337273	1684151	4066789	2807953	3907218	2676555	3027170	2985208	6063571	7482414	3908731	6523611	2638369	1628592	2749326	4738033	3640475	2986313	3019155	2996385	5130728	4568677	6316512	2909860	2996385	1448848	2445864	4140565	3868721	2796589	1954420	2968694	4070778	4632296	2722936	2524182	2825729	1244215	1979481	3562176	3979903	2756973	1531091	3125729
24	3016905	1107817	1130916	2955327	3148592	1687135	4159310	2814537	3923872	2706865	3079424	3005892	4915000	7574276	3944878	6375833	2653967	1614061	2712849	4806736	3572369	2956024	2959705	2988914	5060454	4549127	5753256	2996105	2988914	1458579	2449626	4064163	3763092	2794687	1956745	3016905	3895555	4624229	2789449	2614738	2921250	1268189	1954240	3542343	3951963	2717823	1552329	3121250
24.2	2975598	952183	1055229	3010306	3161848	1689183	4001830	2809713	3925986	2738495	3037705	2968953	4886071	7071172	3945411	5635741	2524728	1576136	2755281	4754414	3625190	2982597	3006895	2987139	4979546	4552089	5666628	2908754	2987139	1453024	2468401	4082218	3718260	2791669	1973617	2975598	3752667	4649523	2594771	2620189	2806875	1241429	1965905	3619195	3975857	2768810	1527415	3106875
24.4	3009586	1015704	1104824	2820699	3117155	1683491	4055471	2815753	3915616	2717823	3087256	3040677	4963214	6055586	3938508	6427407	2533505	1602233	2733649	4795973	3588381	3012662	3020641	2987371	5275182	4554437	5997907	2837193	2987371	1443651	2491555	4225952	3743610	2792094	1946397	3009586	3906222	4626727	2758165	2617442	2854479	1253341	1959603	3562176	3961178	2764059	1524146	3154479
24.6	2998281	1010493	1130898	3145677	3225132	1684644	3923640	2799132	3928762	2756973	3078923	3007440	4807143	5855517	3942324	6427361	2655516	1608628	2744432	4765994	3587439	3042376	2954671	2934497	5442182	4577349	3824419	3048842	2934497	1444423	2477140	4197521	3839293	2790889	1947870	2998281	4333445	4591258	2550000	2532080	3241146	1233579	1989584	3562176	4003442	2709638	1497450	3141146
24.8	3012146	1037218	1112799	2972708	3244340	1680258	4095983	2833495	3922258	2717823	3104699	3021643	4946786	5746069	3927631	6203426	2777826	1560404	2741843	4663651	3617521	3046016	2965821	2971920	5056545	4570402	5376977	2933895	2971920	1452105	2478678	4261517	3705289	2771476	1956534	3012146	3857556	4641126	2546697	2607898	3166458	1254950	1943233	3590533	4009441	2712780	1539231	3166458
25	3016830	1057923	1158979	3202795	3443402	1689121	4056810	2800188	3924784	2768810	3106186	3028118	5125714	6153448	3916563	6141852	2606467	1589682	2784908	4800387	3644747	3023003	3002780	2956229	5299909	4563004	4606046	2795684	2956229	1438925	2480865	4174927	3763378	2784579	1960631	3016830	4008222	4629771	2692385	2680211	3076771	1239657	1979194	3583734	3994111	2668801	1517023	3176771
25.2	2991359	1004384	1096232	3229301	3619619	1680269	4165659	2825548	3939402	2764059	3080357	3027046	4313929	6265172	3926621	5736389	2686658	1597876	2710402	4724885	3532455	3074803	2962703	2970817	5277636	4547994	3682093	2591211	2970817	1441492	2442154	4174791	3691529	2795890	1949049	2991359	3897667	4672157	2337982	2512614	3136250	1268826	1991211	3529833	3961094	2718687	1540509	3136250
25.4	2981140	1038187	1149648	2937598	3354106	1680290	4123797	2820938	3926859	2709638	3130459	3022658	4746071	6067379	3938569	5700880	2569565	1576819	2752779	4868033	3595633	3018505	2999021	2933669	5863182	4575901	4650349	2755667	2933669	1455556	2496478	4072667	3714677	2799043	1951594	2981140	3798333	4646734	2413119	2621880	3165833	1253191	1982729	3523452	3946644	2732365	1559938	3165833
25.6	2991589	1016937	1109824	3214498	3622434	1681213	4076736	2831710	3933494	2712780	3089580	3002060	4990000	6019172	3930747	5276296	2592065	1580289	2737134	4743692	3632498	3049025	2996726	2957359	5532545	4549597	3815581	2921211	2957359	1436561	2438281	4050565	3826388	2790425	1959670	2991589	3829111	4619872	2601101	2513326	3535208	1230011	1985560	3572950	3958990	2656793	1562092	3135208
25.8	2952270	998099	1158028	2946594	3110909	1689164	4245042	2815911	3960211	2668801	3088223	3023110	4877143	5813793	3950794	4925278	2714049	1606423	2739757	4855879	3545906	3012662	2957840	2976132	5622364	4527918	5694070	2949105	2976132	1445416	2485040	4158232	3721202	2795932	1952101	2952270	4177778	4633666	2434679	2368076	3173333	1246345	1975347	3526893	3978594	2715100	1536523	3173333
26	3002594	993873	1060669	3116245	3337595	1681696	4018661	2781941	3967859	2718687	3099014	3008546	5119643	5953931	3883643	4712176	2655978	1548105	2748652	4721360	3576777	3012662	3012290	2978991	5504545	4548937	5452907	2970579	2978991	1413079	2454418	4168933	3776257	2795149	1957685	3002594	3944333	4613478	2551651	2495528	3258438	1215747	1948002	3579257	3938901	2682692	1528245	3258438
26.2	3023556	1021620	1142482	3151485	3102698	1689349	4121810	2795598	3962318	2687377	3078761	3049894	4652143	5921931	3911498	4897130	2669565	1593301	2795405	4852908	3587723	3049959	3028014	2945372	5550637	4547905	3578837	2988860	2945372	1418355	2434369	4089697	3724784	2794687	1959952	3023556	3796222	4624701	2557615	2441201	3159375	1254919	2010874	3550397	4014341	2748357	1525799	3159375
26.4	3039302	1046021	1120106	3052184	3274018	1686214	4084749	2809089	3929299	2771440	3063650	3016440	4386429	5754690	3903839	4473750	2651060	1600830	2770627	4837877	3572690	3037537	2966003	2963212	5571182	4553086	6318837	2935807	2963212	1437372	2441871	3988525	3678620	2791669	1947854	3039302	3605000	4636184	2357890	2526073	3364479	1213698	1963696	3503117	3910004	2751314	1553964	3164479
26.6	3007594	1026884	1073609	2773974	3001349	1687040	4135680	2831089	3950254	2755475	3041886	3010619	4584286	5818828	3891789	4473611	2620489	1568979	2773323	4881130	3555635	3025670	2977372	2947170	5589545	4525703	5369651	3083369	2947170	1446692	2432841	4184697	3760796	2788950	1945036	3007594	4039778	4619031	2681743	2610612	3632083	1250704	1979653	3517270	3957463	2709108	1552160	3132083
26.8	2972732	1087570	1168503	2754803	2936774	1682249	4076318	2798268	3934818	2738495	3049743	3059306	4705357	5787034	3896628	4252685	2527147	1595842	2752984	4886768	3595444	2989429	3028641	2971347	5441454	4552564	6031744	3161263	2971347	1424272	2437325	4012207	3805253	2796589	1964604	2972732	3730333	4624594	2585413	2594105	3236146	1257750	1961793	3608033	3946730	2649019	1554875	3236146
27	2984179	998644	1120211	2897991	3230029	1681397	4144278	2836096	3937742	2775887	3044775	3013515	4209643	6463517	3881164	4499305	2721223	1593667	2754128	4770136	3686663	3032659	3027170	3012094	5550818	4561020	6091279	3172947	3012094	1445857	2412870	4125429	3791071	2798470	1960120	2984179	4002333	4583058	2834496	2556062	3082083	1240889	1996887	3591789	3942660	2681546	1565112	3182083
27.2	2988067	1041884	1046919	2780087	3063959	1683179	4155638	2801523	3926751	2756973	2991098	3008785	3853929	7184069	3898303	4305787	2701794	1553925	2734071	4916035	3599482	2939685	3079424	2985208	5994091	4540244	3989651	3223281	2985208	1427680	2462032	4079582	3835481	2798228	1965505	2988067	3571889	4607284	2597982	2493793	3231354	1241780	1959666	3566035	3902253	2673584	1527642	3231354
27.4	3004913	1071215	1081285	2881528	3345308	1688921	4051161	2820488	3935603	2717823	2997105	2996461	3672857	7112759	3928959	3940972	2483478	1590494	2735708	4723546	3618392	2943282	3037705	3005892	5304272	4603219	5919651	3174438	3005892	1433724	2419393	4075994	3797190	2793575	1931378	3004913	3926333	4639091	2547523	2604716	2820521	1229276	1978928	3577625	3928443	2709804	1546231	3120521
27.6	2991128	1064120	1088697	2816768	3399912	1693395	4117510	2756746	3931183	2768810	3032197	3016943	4316429	6499655	3920705	4052408	2580054	1579441	2726830	4922950	3611380	2943196	3087256	2968953	5594909	4566252	6046628	3308842	2968953	1430338	2470373	4191015	3758030	2799494	1946786	2991128	3979222	4653444	2742110	2629989	3195521	1251992	1980095	3556987	3917495	2682000	1515250	3195521
27.8	3007688	1131373	1127500	3022751	3316422	1691363	3983703	2830800	3913586	2764059	3052390	3049333	4663929	6422138	3875578	4160324	2657935	1537828	2694412	4793452	3736656	2994656	3078923	3040677	5607455	4582138	3747325	3130263	3040677	1392987	2426953	4116726	3860043	2794103	1916150	3007688	3862778	4630309	2456330	2601435	3163229	1204769	1972883	3521715	3936360	2678991	1545645	3163229
28	2991266	1027218	1052113	2918297	3347595	1683464	4100397	2772012	3930088	2709638	3020685	3075471	3663214	6669931	3911247	3904074	2656196	1556334	2727044	4806057	3622316	2954268	3104699	3007440	6041091	4600531	5710349	3102298	3007440	1428349	2438621	4125042	3718837	2797668	1940761	2991266	3798333	4646929	2546697	2651646	3311562	1244786	1990246	3517437	3985913	2667191	1537458	3111562
28.2	3032729	1074771	1120775	2763668	3149149	1698309	4079623	2811408	4002503	2712780	3047307	3009685	3927857	6451172	3870459	3927639	2629891	1582382	2699447	4942134	3602086	2863697	3106186	3021643	5501909	4584811	5369418	3337333	3021643	1416303	2442446	4113933	3804550	2798950	1944049	3032729	3932778	4610838	2692385	2698420	3141250	1235133	1967616	3585743	3969998	2676555	1545114	3141250
28.4	3001148	1018380	1045053	2984498	3243021	1686553	4199812	2782826	3926149	2668801	3005397	2997820	3796786	6507310	3921955	3765046	2649810	1566959	2735504	4806987	3655825	2927742	3080357	3028118	5507091	4610163	5241395	3201246	3028118	1408563	2433783	4118274	3817340	2796589	1935265	3001148	3588222	4640316	2337982	2615762	3498125	1261260	1948696	3502113	3962331	2706865	1561568	3198125
28.6	2988808	1082271	1023838	2897642	2876452	1682276	4097856	2829342	3925986	2712307	3010798	3005640	4138214	6773793	3917540	3835046	2671576	1568593	2695628	4851161	3606579	2888705	3130459	3027046	5578909	4608583	5174535	3083509	3027046	1420729	2420240	4117207	3757280	2794687	1957261	2988808	3912889	4554655	2413119	2682848	3152083	1225394	1959225	3616067	3905917	2738495	1532908	3152083
28.8	3039043	1028187	1105211	2888908	3146774	1683715	4118138	2782310	3915616	2654533	2977909	3020499	4435714	6500069	3908731	3571296	2728206	1576911	2715894	4807197	3655450	2928059	3089580	3022658	5444182	4557497	5081628	3101386	3022658	1419475	2394927	4158305	3830004	2791669	1972979	3039043	3899111	4648210	2601101	2616897	2979583	1227287	1969835	3563055	3932109	2717823	1562096	3179583
29	3006772	1042500	1077764	2797205	2893109	1686484	4052113	2772386	3928762	2715851	3095047	3039063	4026786	6452207	3944878	3744213	2816331	1574440	2694816	4911443	3613397	2947282	3088223	3002060	5289363	4582149	4889419	3127614	3002060	1421744	2457459	4189299	3830830	2792094	1991290	3006772	3766111	4601251	2434679	2679700	2845521	1239359	1961328	3591799	3971417	2756973	1560522	3145521
29.2	3002887	1125563	1080141	2832227	2880733	1687669	4191433	2810648	3922258	2704249	2998858	3017733	4061071	6760414	3945411	3598518	2633886	1560277	2738635	4768128	3632780	2984770	3099014	3023110	5414182	4555428	5247675	3114930	3023110	1417205	2387056	4121736	3698577	2790889	1957977	3002887	3849556	4606100	2551651	2620300	3156771	1200594	1974711	3599425	3924305	2717823	1576913	3156771
29.4	2998787	1121109	1102148	2847598	3001320	1681980	4216203	2823771	3924784	2703848	2954872	3016802	4696071	6580690	3938508	3707408	2536658	1549997	2711707	4667699	3679194	2960421	3078761	3008546	5495728	4587083	3513954	2885544	3008546	1394045	2440583	4170031	3819033	2771476	1981931	2998787	3667111	4626552	2557615	2673693	3056458	1240767	1947600	3591517	3927742	2768810	1552639	3156458
29.6	3031560	1140123	1140211	2727162	2900235	1688260	3960115	2801211	3910720	2661563	3012838	3025239	4003571	5968690	3942324	3626158	2738071	1572138	2751974	4835408	3592821	2942847	3063650	3049894	5235818	4578447	5611047	2931281	3049894	1426833	2395902	4171098	3732832	2784579	1964574	3031560	3948000	4605645	2357890	2632536	3347500	1200684	1944517	3595565	3887686	2764059	1556789	3147500
29.8	2990117	1069014	1066849	2788210	3200323	1684151	3999718	2801302	3971069	2685487	2965863	2998661	3737500	6044690	3927631	3451389	2667908	1569217	2693799	4874467	3742612	2972464	3041886	3016440	5104727	4587148	5260349	2874351	3016440	1396005	2445766	4145847	3739516	2795890	1963309	2990117	4051000	4618716	2681743	2591446	3053333	1243485	1954882	3581381	3901062	2709638	1563801	3153333
30	2995879	1063820	1043556	2724410	3240410	1687135	3831653	2801504	3997983	2764059	2950541	3024817	3700000	6451517	3916563	3551296	2714049	1533245	2702221	4929571	3659994	2925253	3049743	3010619	5422545	4577218	5124883	2938754	3010619	1388164	2412460	4129299	3795681	2799043	1983771	2995879	3834222	4582978	2585413	2554216	3310104	1241734	1937300	3532845	3893599	2712780	1565197	3110104
30.2	3014867	1131109	1092148	2997031	3278651	1689183	4059445	2795160	3948426	2709638	2964004	3018866	4119643	6609241	3926621	3541852	2655978	1578404	2714453	4880837	3723225	2978586	3044775	3059306	5370818	4553639	4729070	3144807	3059306	1419040	2451711	4126611	3664233	2791658	1950616	3014867	4290000	4632938	2834496	2517798	3259479	1244739	1960117	3551517	3877581	2668801	1573587	3259479
30.4	2967187	1056056	1066444	3048166	3539267	1689359	4029707	2794767	4011716	2712780	2937218	2969281	3147143	6303793	3938569	3726805	2669565	1568536	2737920	4821747	3603130	2976383	2991098	3013515	5368000	4567140	4095000	3328614	3013515	1411924	2389244	4125868	3755145	2798950	1970890	2967187	4044667	4593852	2597982	2439377	3064167	1245714	1964451	3571234	3971664	2718687	1572196	3164167
30.6	3002828	1003627	1132518	2839913	3450146	1681980	4140010	2767842	3966659	2668801	2948084	3003196	3552143	6296000	3930747	3732268	2651060	1510951	2734528	4738033	3731172	2982597	2997105	3008785	5439636	4568633	4524186	3193175	3008785	1389180	2389520	4120105	3800213	2796589	1993968	3002828	3951667	4658723	2547523	2440067	2939583	1213212	1936710	3601057	3887321	2687377	1576442	3139583
30.8	3007008	1052306	1074824	2901921	3496305	1688260	3943159	2792545	4014206	2712307	2991126	2987328	3091429	6207517	3950794	3505741	2764674	1556253	2732637	4806736	3799974	3012662	3032197	2996461	5453273	4574860	4177442	3146211	2996461	1411702	2412991	4142918	3784406	2794687	1993474	3007008	3904778	4568977	2742110	2538510	3048333	1228740	1969868	3487301	3895083	2771440	1562494	3148333
31	3003882	1061356	1087940	2712751	3153988	1684151	4175952	2770188	4039542	2654533	3013032	2995613	2951786	6534483	3958960	3518565	2675734	1561969	2673112	4754414	3651681	3042376	3052390	3016943	5780091	4578979	2947093	3338684	3016943	1419575	2385594	4137542	3819417	2771669	1960546	3003882	3881778	4616385	2456330	2688732	3138854	1199172	1953965	3580293	3908667	2755475	1582203	3138854
31.2	3001941	1010018	1061144	2714061	3332317	1687135	4111266	2802298	4021563	2708579	2996197	2945063	3676429	6549793	3899465	3518842	2785000	1625430	2717735	4795973	3763687	3046016	3020685	3049333	5484454	4585446	4085233	3195052	3049333	1411994	2430187	4160555	3883788	2778950	1972046	3001941	3784445	4638929	2393853	2716863	3499271	1241598	1952713	3565492	3934178	2738495	1570663	3199271
31.4	3027152	1021197	1039824	3043188	3362845	1689183	4169299	2764968	3961868	2693165	3003318	3005651	3506786	5758896	3934494	3510555	2686766	1606844	2707388	4765994	3630475	3023003	3047307	3075471	5962545	4563892	3420000	3165070	3075471	1409623	2380910	4114142	3890208	2836531	1978452	3027152	3969111	4632297	2596881	2596329	3560625	1190223	1938272	3606695	3888226	2775887	1559021	3160625
31.6	2999827	1088768	1079208	2659520	3129677	1689359	4097238	2777164	3925986	2754109	2994246	2974135	3242500	5906965	3946201	3548889	2630924	1616504	2741425	4663651	3718138	3074803	3005397	3009685	5420637	4549688	3936977	3186491	3009685	1401225	2417666	4136674	3887396	2798950	1970552	2999827	3956555	4610090	2526973	2579711	3108958	1283594	2008436	3508086	3854163	2756973	1580286	3108958
31.8	3003630	1032253	1105387	2883493	3210381	1688669	4008316	2829342	3915616	2731052	3028583	2977324	3757857	6658965	3943699	3569630	2620489	1630947	2725747	4800387	3618409	3018505	3010798	2997820	5479363	4562376	3557558	3160474	2997820	1404378	2361905	4150366	3871176	2796589	1989113	3003630	3780444	4587655	2683578	2594305	3299167	1232439	1995833	3523065	3931131	2717823	1571928	3199167
32	2987547	1031426	1140194	2930611	3392581	1687433	4107971	2782310	3928762	2676424	3003227	2992772	2705357	6765586	3945550	3443889	2527147	1581307	2732101	4724885	3659394	3049025	2977909	3005640	5705000	4589581	2882907	3201333	3005640	1392959	2418261	4124875	3849041	2794687	2007490	2987547	3754778	4591955	2506514	2715172	3439167	1242146	1963334	3531893	3939492	2768810	1553658	3139167
32.2	3025751	1060229	1086514	2837860	3460557	1690579	4023232	2772386	3925986	2657029	3042314	3010574	3028214	6905172	3898303	3802685	2721223	1660387	2726830	4791015	3731172	3012662	3095047	3020499	5608364	4649936	3229651	3445632	3020499	1401317	2363886	4093557	3869443	2774687	1960631	3025751	3718111	4739806	3090734	2782269	3237188	1180843	1973373	3567479	3855227	2764059	1601527	3237188
32.4	3025616	1067042	1074366	2828122	3472727	1683158	4172427	2810648	3915616	2722471	3007982	3006785	2756071	6508414	3928959	3904583	2701794	1667044	2769502	4716726	3770456	3012662	2998858	3039063	5916727	4614553	3623372	3187596	3039063	1404783	2392374	4150262	3876418	2781669	2008377	3025616	3919333	4653894	2858165	2774661	3037917	1248645	1968482	3538483	3840621	2709638	1565080	3137917
32.6	2991045	1058327	1043187	2915109	3331437	1698309	4132636	2823771	3928762	2706865	3030336	2994792	3100000	6744621	3920705	3832870	2483478	1652564	2746352	4825042	3776968	3049959	2954872	3017733	5594454	4580596	3802907	3123860	3017733	1448405	2461028	4017636	3871176	2798950	2000260	2991045	3813556	4614106	2897982	2647708	3205833	1194223	1981638	3587667	3862627	2712780	1582001	3205833
32.8	3004675	1082606	1111989	2973101	3414751	1686553	4265324	2801211	3922258	2725626	3040863	3018105	3385357	6524483	3875578	3993287	2580054	1660387	2718499	4783065	3804014	3037537	3012838	3016802	5734636	4576379	3312442	3248544	3016802	1407337	2367803	4105010	3921466	2796589	2003805	3004675	4095667	4646895	2839541	2637642	3663125	1228945	1980735	3542176	3851183	2668801	1586856	3163125
33	3001324	1079419	1085986	2849039	3196862	1682276	4115722	2801302	3924784	2722837	3030803	2997820	3227143	7075241	3911247	3727408	2657935	1612012	2713820	4859561	3783191	3025670	2965863	3025239	5664454	4617006	3725465	3333754	3025239	1408505	2388093	4058494	4017306	2798950	2000643	3001324	3838889	4632592	2383853	2783604	3296562	1245288	1987836	3620628	3830888	2712307	1581805	3196562
33.2	3007829	1078327	1053574	2834236	3278856	1683715	4314916	2801504	3970019	2712645	3002522	3005640	2582500	7528069	3870459	3875370	2656196	1610459	2686428	4796789	3762146	2989429	2950541	2998661	5940818	4541945	2821977	3259912	2998661	1401183	2365324	4118588	4040316	2796589	2011227	3007829	4175444	4640698	2751284	2752036	3423854	1220219	1963038	3556527	3928198	2654533	1600244	3123854
33.4	2987434	1010669	1106003	2678384	3395191	1686484	4075439	2795160	3947476	2703708	3017696	3020499	2681071	7281517	3921955	3781759	2790136	1625430	2723162	4854268	3770901	3032659	2964004	3024817	5164909	4533447	3742325	3281912	3024817	1383694	2384822	4111726	3970204	2794687	2018208	2987434	4245778	4618666	2591009	2649099	3399062	1231015	1986380	3528201	3872636	2715851	1595487	3199062
33.6	3011653	1146567	1091285	2942358	3165894	1687669	4010157	2794767	3981146	2689733	3083162	3039063	2920000	7131172	3917540	3902454	2596631	1606844	2689619	4738023	3851079	3027368	2937218	3018866	5683273	4562979	3833256	3445193	3018866	1398449	2388323	4142479	3996983	2791669	1993904	3011653	4077444	4561661	2569817	2654460	3021562	1186148	1965459	3588828	3872726	2704249	1574379	3121562
33.8	2995662	966285	1158680	2995590	3402082	1681980	4286925	2767842	3944292	2706865	3078058	3017733	2250714	7133448	3908731	4017963	2837038	1616504	2723031	4835209	3805534	3045228	2948084	2969281	5211545	4565531	3200000	3479474	2969281	1401334	2386671	4030690	3935429	2792094	2004034	2995662	3771555	4595475	2608991	2662714	3232188	1210458	1949577	3531621	3896160	2703848	1602877	3232188
34	3011638	1070176	1040141	2818515	2972023	1688260	4081799	2792545	3942931	2731052	3076063	3016802	2881429	6768207	3944878	3650139	2573315	1630947	2714537	4810262	3828817	3074859	2991126	3003196	5548818	4553593	3986163	3691298	3003196	1400263	2360163	4058546	3921466	2790889	1995373	3011638	3932778	4597378	2489541	2689488	3482188	1177319	1952920	3497301	3900772	2661563	1619217	3182188
34.2	3011281	1004419	1164912	2901659	3295718	1686484	4199100	2770188	3964283	2709638	3017079	3025239	2790357	6777448	3945411	3745555	2623342	1581307	2686709	4790648	3860546	3082981	3013032	2987328	5285455	4551363	3613954	3487053	2987328	1400777	2365163	3989174	3943567	2771476	1969907	3011281	3588222	4617707	2453945	2620990	3536042	1230299	1997235	3543138	3884636	2685487	1576747	3136042
34.4	3003698	987500	1105123	2915633	3212141	1687669	4275785	2802298	3976938	2708579	3040273	2998661	2490714	6917931	3938508	3860555	2719674	1628592	2691824	4702186	3820058	3080787	2996197	2995613	5279818	4587547	3807442	3519386	2995613	1379442	2371850	4029090	3969518	2784579	1975760	3003698	3912889	4580200	2769817	2648654	3729583	1196635	1941221	3523002	3893073	2764059	1602842	3129583
34.6	3002140	1060211	1063662	3092576	3506334	1681980	4639080	2764968	3960064	2756973	3055172	3024817	2717500	7098965	3942324	3662870	2772962	1614061	2718009	4781255	3828918	3049590	3003318	2945063	5462364	4545822	3780116	3464018	2945063	1397664	2361999	4052322	3962335	2795890	2001181	3002140	3899111	4626919	2782477	2640523	3453021	1234717	1971046	3483849	3885184	2709638	1606398	3153021
34.8	2997034	1014894	1095933	2922620	3633871	1688260	4559362	2777164	3955868	2717823	3026714	3018866	3219286	6959103	3927631	3736065	2822038	1576136	2708943	4821297	3837631	2987110	2994246	3005651	5516000	4611208	2978372	3439456	3005651	1373811	2377810	4018441	3972881	2799043	1950127	2997034	3766111	4614319	2887798	2431624	3330208	1217673	1938304	3493651	3903896	2712780	1597405	3130208
35	3004344	1100968	1093856	2883625	3348974	1684151	4547312	2789697	3910479	2768810	3063091	2969281	2656786	6748965	3916563	3555139	2635353	1602233	2689892	4760188	3841750	2979874	3028583	2974135	5112273	4571469	3870698	3580684	2974135	1388816	2352842	4022814	3966618	2791658	1973271	3004344	3849556	4616456	2774128	2495584	3215938	1214649	1976782	3596914	3947413	2668801	1582354	3215938
35.2	3003713	1061796	1146391	2920699	3174663	1687135	4760659	2777138	3899091	2764059	3039236	3003196	3116071	6696552	3926621	3856389	2695571	1608628	2684190	4882793	3887555	2977891	3003227	2977324	5595546	4566123	3735581	3617930	2977324	1389444	2408378	3970262	4006156	2798950	1956591	3003713	3667111	4608659	2998899	2527764	3251146	1229315	1949381	3596151	3898159	2712307	1573469	3251146
35.4	3023363	1072817	1144014	2676943	2732023	1689183	4442856	2796653	3868867	2709638	3063889	2987328	2749286	6719448	3938569	3803472	2610217	1560404	2692836	4663609	3882569	2982986	3042314	2992772	5345364	4606929	3333954	3615316	2992772	1373371	2482941	4015199	4008723	2796589	1930269	3023363	3969111	4664792	2514495	2779043	3184688	1181091	1965409	3552165	3854163	2654533	1592289	3184688
35.6	3022299	1083099	1158099	2942751	3033812	1689359	4726443	2803208	3946388	2712780	3095777	2995613	2632857	6859724	3930747	3500741	2668478	1589682	2686400	4818347	3839529	3048078	3007982	3010574	5671636	4599852	4265233	3446737	3010574	1384405	2433783	3978170	4022524	2794687	1957139	3022299	3956555	4632227	2730734	2675362	3465833	1211421	1964497	3516192	3890043	2708579	1627888	3165833
35.9	2995888	991320	1147975	2786943	2879677	1688669	4615471	2778166	3916534	2675797	3065761	2945063	2987143	6684138	3950794	3572546	2592228	1597876	2673684	4767490	3917433	3001855	3030336	3006785	5726909	4589004	3899651	3223614	3006785	1378085	2420240	3997782	4008725	2771669	1946439	2995888	3780444	4647291	2780183	2723270	3540729	1192030	1957262	3505251	3906076	2693165	1605502	3140729
36	2992857	1035704	1112183	2705851	3130528	1687433	4804979	2806570	3936323	2676555	3103712	3005651	2898214	6456276	3975015	3425232	2539837	1576819	2685573	4744791	3884603	2977143	3040863	2994792	5211545	4561332	3782558	3265386	2994792	1391185	2394927	4089226	3978624	2778950	1971170	2992857	3754778	4673101	2720551	2702091	3535938	1228790	1989298	3577625	3918798	2754109	1605830	3135938
36.2	2983618	1003750	1051021	2819039	3073050	1693707	4466789	2786316	3966106	2706865	3075485	2974135	2838929	6927241	3989045	3487176	2474701	1580289	2664545	4866674	3866994	2909029	3030803	3018105	5548818	4619602	4013721	3437772	3018105	1383179	2457459	4041475	3964922	2796589	1937893	2983618	3811333	4648984	2439541	2811791	3306250	1182692	1941480	3556987	3914846	2731052	1600364	3106250
36.4	3006450	1161162	1046497	2689738	2943314	1686553	4549644	2766808	3941299	2738495	3087385	2977324	2825714	6518414	3998291	3941111	2586223	1606423	2688901	4705157	3891512	2903490	3002522	2997820	5285455	4599864	2818837	3594632	2997820	1376726	2387056	4036433	3961557	2796589	1924900	3006450	3663445	4630058	2692294	2616352	3601354	1217943	1973544	3521715	3874489	2676424	1602987	3101354
36.6	3035171	1047271	1101673	2806157	3227331	1682276	4511035	2814465	3946663	2717823	3103202	3035406	2925357	6826414	3952931	3466805	2617609	1548105	2666825	4808776	3855276	2932112	3017696	3005640	5279818	4576124	4117442	3689105	3005640	1382775	2440583	4085983	3963821	2774687	1944520	3035171	3792778	4649597	2602661	2771490	3249271	1215347	1952064	3517437	3896775	2657029	1608596	3149271
36.8	2990931	1049930	1021356	2563362	2868152	1683715	4195513	2760670	3977854	2756973	3062821	2996573	2645000	6629241	4000950	3330370	2738478	1593301	2686252	4753598	3868185	2926588	3083162	3020499	5462364	4533608	3944070	3732965	3020499	1389294	2395902	4077019	3938396	2781669	1939884	2990931	4070778	4678737	2474037	2839277	3673854	1221252	1934915	3585743	3813070	2722471	1629410	3173854
37	3005644	1086497	1131285	2774454	3185396	1686484	4202793	2790603	3956558	2717823	3095815	3001430	2867857	6962621	3973348	3358935	2695109	1600830	2675090	4714320	3887910	2958913	3078058	3039063	5516000	4604980	3933954	3730246	3039063	1406862	2445766	4225952	3949955	2798950	1916306	3005644	3895555	4652163	2597706	2720111	3389583	1212545	1942957	3502113	3885958	2706865	1616034	3189583
37.2	3006297	1055916	1007377	2626288	3107918	1687669	4162897	2774626	3961372	2768810	3108501	3027771	2971071	7527034	3983473	3536065	2806467	1568979	2687575	4820450	3827777	2903739	3076063	3017733	4911909	4580526	3727325	3604456	3017733	1388199	2412460	4197521	3998271	2796589	1951191	3006297	3752667	4646591	3058165	2668087	3500312	1201521	1961101	3616067	3861109	2725626	1615924	3100312
37.4	3003438	1044102	1109930	2678253	3072962	1681980	4253609	2815390	3954478	2654533	3066144	3008152	2403571	7270483	3999279	3692500	2817119	1595842	2667953	4729508	3896263	2890030	3017079	3016802	5430546	4614915	3302442	3654649	3016802	1371050	2451711	4261517	4011221	2798950	1932497	3003438	3583556	4648680	2803303	2795706	3644271	1227362	1958931	3563055	3887472	2722837	1622818	3144271
37.6	3041714	1065669	1018116	2852708	3303959	1688260	4085555	2789054	3983823	2715851	3071172	2997820	2771429	7351517	4011908	3542268	2636331	1593667	2659224	4699582	3878106	2875356	3040273	3025239	5383909	4598796	3257675	3569018	3025239	1387482	2389244	4174927	3995448	2796589	1913538	3041714	4100778	4597108	2577248	2691190	3546250	1181574	1972061	3591799	3812135	2712645	1644113	3146250
37.8	2989391	1089718	1031884	2780655	3055425	1684151	4087301	2769919	3944954	2704249	3040687	3005640	2725000	7199586	4010406	3610000	2950027	1553925	2656659	4777992	3894569	2931378	3055172	2998661	5363000	4612184	3075233	3502509	2998661	1388538	2392374	4174791	4007929	2794687	1929006	2989391	3647333	4574337	2840183	2678343	3511458	1230679	1953692	3599425	3736351	2703708	1643949	3111458
38	2993073	1029225	1106338	2708734	3117566	1687135	4135680	2780309	4013771	2703848	3023385	3020499	3062143	7052000	4005375	3626898	2789891	1590494	2638011	4766663	3918304	2872514	3026714	3024817	5640909	4547988	3077093	3587351	3024817	1377104	2471517	4072667	3946569	2809563	1946698	2993073	3913000	4624218	2692569	2636240	3506250	1188351	1930257	3591517	3712139	2689733	1640078	3106250
38.2	3012747	1066813	1106831	2946419	3267977	1689183	4072657	2774738	3994681	2661563	3028053	3039063	2851429	7300897	4003717	3858195	2908940	1579441	2709554	4780136	3912571	2844879	3063091	3018866	5962545	4575263	3100349	3555333	3018866	1394752	2506690	4050565	3982823	2835994	1931641	3012747	3846111	4626958	2888165	2704060	3145521	1223556	1938249	3595565	3717846	2706865	1615685	3145521
38.4	2983898	1042482	1151620	2871703	3595748	1689359	4136433	2803779	3977065	2685487	3019511	3036964	2810000	6723586	4034296	3932870	2732011	1537828	2638871	4754791	3921823	2905101	3039236	2969281	5420637	4571817	3162093	3534825	2969281	1370224	2497937	4158232	4031598	2804448	1917981	2983898	3862000	4653373	2941468	2704894	3657708	1201993	1966531	3581381	3592520	2731052	1659464	3157708
38.6	2983729	1091356	1058785	2803232	3630469	1683715	4042866	2754361	4039542	2764059	2994246	3012855	3088214	7106896	3996006	3731435	2579864	1556334	2656183	4763055	3902524	2934358	3063889	3003196	5479363	4650405	3426977	3759983	3003196	1364087	2492116	4168933	4005827	2776147	1918864	2983729	3519778	4639367	2675138	2727464	3481250	1225716	1986951	3532845	3698037	2709638	1636486	3181250
39	2999650	1105352	1049349	2994585	3597009	1686484	4164278	2780017	4021563	2709638	3028583	3000429	2861071	7128414	4016437	3426713	2546223	1582382	2632748	4791872	3926433	2953391	3095777	2987328	5705000	4637678	3694651	3598018	2987328	1399097	2501856	4089697	3980084	2833877	1919636	2999650	3766000	4625919	2951835	2697597	3389688	1231096	1965268	3551517	3644949	2708579	1642959	3189688
39.2	2960021	1007465	992130	2655851	3330645	1687669	4012929	2752605	3961868	2712780	3003227	3024764	2355357	7217241	4055344	3669908	2622826	1566959	2649506	4853609	3908523	2961165	3065761	2995613	5608364	4599967	2745116	3704754	2995613	1390739	2494136	3988525	3960987	2794687	1881053	2960021	3542111	4620725	2794312	2572058	3367604	1230140	1971566	3538483	3554029	2756973	1669793	3167604
39.4	3000931	1169296	1124384	2756507	3215894	1681980	4069603	2750739	3925986	2668801	3042314	3019807	2983929	6668207	4022930	3831204	2638342	1568593	2655915	4682877	3914006	2983674	3103712	2945063	5916727	4573689	3856395	3690684	2945063	1379829	2496842	4184697	4003935	2791669	1922435	3000931	3746778	4615955	2982936	2476707	3848229	1225407	1978641	3587667	3543636	2717823	1659747	3148229
39.6	3005707	1049190	1061391	2708210	3268094	1688260	4059749	2752653	3915616	2712307	3007982	2991799	3140357	6571172	4010367	3709305	2671549	1576911	2648127	4779885	3940957	3045809	3075485	3005651	5594454	4585531	3828721	3757965	3005651	1372202	2430950	4159718	4012563	2792094	1920217	3005707	3878889	4623846	2920000	2537319	3264167	1204512	1965459	3542176	3666048	2768810	1658345	3164167
39.8	2997069	1058574	1096109	2799913	2993724	1684151	4046684	2783657	3928762	2654533	3030336	2987517	3426786	7669793	3999723	3692454	2515870	1574440	2642924	4800387	3881041	3025699	3087385	2974135	5734636	4609883	3436860	3732474	2974135	1385888	2438890	4204111	4046300	2790889	1922517	2997069	3903556	4613354	2754220	2555851	3476250	1225381	1949577	3620628	3523604	2764059	1659062	3176250
40	3000394	1083750	1151285	2700524	3414985	1687135	4082008	2760030	3925986	2708579	3040863	2996385	2879643	7393586	4004768	3758102	2523886	1560277	2659908	4771255	3938785	3057946	3103202	2977324	5664454	4589826	3600233	3778474	2977324	1373371	2387056	4089226	4022524	2771476	1960648	3000394	3638778	4617419	2815504	2651557	3696146	1187632	1952920	3556527	3557353	2709638	1639610	3196146
40.2	3007747	1125616	1140757	2971485	3304457	1689183	4639080	2806454	3915616	2693165	3030803	2988914	2753929	8067034	4016508	3932268	2494538	1549997	2708212	4805387	3945646	3055475	3062821	3035406	5516000	4572208	3229651	3779105	3035406	1384405	2440583	4041475	4008725	2784579	1916410	3007747	3623111	4591807	3154128	2637642	3572292	1225100	1997235	3528201	3559557	2712780	1642884	3172292
40.4	3021507	1094296	1077535	2881747	3307566	1689359	4559362	2784364	3928762	2754109	3002522	2987139	3158929	7963380	4025932	3743889	2560326	1572138	2723585	4783473	3892382	3024842	3095815	2996573	5164909	4561134	4166395	3476123	2996573	1378085	2395902	4036433	3978624	2795890	1896485	3021507	3794445	4608777	3118624	2803259	3595000	1192384	1941221	3588828	3504459	2675797	1634871	3195000
40.6	2988761	1066479	1061092	2911659	3321290	1681980	4547312	2791205	3922258	2731052	3017696	2987371	2805000	8263517	4020768	3991574	2622500	1569217	2657252	4744268	3913346	3063976	3108501	3001430	5683273	4619338	4222093	3243842	3001430	1391185	2445766	4085983	3964922	2799043	1907768	2988761	3746222	4592405	3169449	2759488	3519479	1226460	1971046	3531621	3631243	2676555	1671129	3119479
40.8	3008705	1090247	1063908	2546201	3100440	1689183	4760659	2772481	3924784	2676424	3083162	2934497	2886786	8291035	4042650	3713287	2685516	1533245	2674733	4787793	3932520	3054902	3066144	3027771	5211545	4610851	3191860	3324193	3027771	1383179	2412460	4077019	3961557	2790425	1904514	3008705	3624667	4644510	2679174	2615273	3444167	1211665	1938304	3505251	3561391	2706865	1650553	3144167
41	3005392	1052975	1147236	2681223	3322082	1689359	4442856	2760331	3970019	2657029	3078058	2971920	3187857	8360828	4041832	3858472	2735788	1578404	2623892	4766370	3925635	3002395	3071172	3008152	5548818	4563954	4066163	3735298	3008152	1376726	2451711	4225952	3963821	2795932	1879215	3005392	3631000	4662123	2602294	2558498	3638438	1204184	1976782	3577625	3660606	2738495	1678179	3138438
41.2	3014071	1002940	1059190	2857904	3448211	1681980	4726443	2790942	3946388	2722471	3076063	2956229	3322143	8651586	4029389	3863658	2651631	1568536	2666275	4771945	3880759	3047819	3040687	2997820	5285455	4599406	3639070	3861895	2997820	1382775	2389244	4197521	3938396	2795149	1907775	3014071	3798667	4656701	2689083	2753949	3740833	1209820	1949381	3556987	3516229	2717823	1674723	3140833
41.4	2986655	1037887	1206655	2955197	3436334	1688260	4615471	2765692	3916534	2706865	3017079	2970817	3828214	8340483	4027762	3532870	2676114	1510951	2603797	4775377	3964461	3012542	3023385	3005640	5279818	4543714	3899419	3886017	3005640	1389294	2392374	4261517	3949955	2794687	1926808	2986655	3551889	4641056	2560917	2634238	3732604	1201568	1965409	3521715	3642847	2756973	1656790	3132604
41.6	3016761	1002060	1122711	2834542	3516921	1684151	4804979	2769786	3936323	2725626	3040273	2933669	3335714	8381241	4007651	3947685	2668179	1556253	2658773	4741778	3931473	2986828	3028053	3020499	5462364	4559769	3869302	3911895	3020499	1406862	2471517	4072667	3998271	2791669	1892422	3016761	3808556	4664813	2797982	2757975	3844688	1203987	1964497	3556527	3545162	2717823	1639436	3144688
41.8	2972070	1108134	1107359	2814367	3355191	1687135	4466789	2745831	3983823	2722837	3055172	2957359	3442500	8212000	4033297	3766898	2694429	1561969	2649724	4844038	3953395	3066407	3019511	3039063	5516000	4582932	2951628	4055158	3039063	1388199	2494136	4050565	4011221	2788950	1859720	2972070	3920444	4656442	2743486	2753626	3609271	1183066	1957262	3640188	3521111	2768810	1657256	3109271

## Sheet: Fig.3B, Fig.3C and Fig.3D
23C09VGlut,UASGCaMP6.0m response to Air, 0.5% CO2, 1% CO2 and 2% CO2 while inhibiting 21G11LexA with LexAopKir2.1
Time	Air					0.5%					0.01					0.02
0.2	4463089	4139183	6238918	7974498	2539415	5038528	3443541	3603550	7694810	2521840	3862934	3473007	6105546	4272349	2402372	4334062	3773826	5408582	4899200	2178849
0.4	4168982	3939533	6004894	7568980	2415030	4863447	3257058	3087792	7651365	2392853	3243610	3261577	5876901	4122889	2285794	3938933	3607402	5180357	4482724	2082573
0.6	3937446	3817319	5911981	7475485	2340644	4759811	3191841	3004796	7208222	2369271	3275679	3216275	5805390	4110882	2256614	3544413	3491777	5120911	4526114	2021596
0.8	3768750	3760267	5844928	7251790	2364516	4729427	3176548	3130078	7026524	2358227	3262544	3167924	5777302	4045355	2229912	3589528	3478977	5051286	4612667	2013200
1	3639616	3721364	5803075	7281221	2357858	4693736	3145613	3029299	7213412	2357828	3211672	3177054	5753975	4054408	2222589	3649703	3466253	5041325	4481371	2020528
1.2	3687804	3667036	5814924	7534465	2326236	4697047	3116428	3016268	7090111	2354609	3204425	3159445	5719095	4077404	2221227	3839657	3421851	5017043	4487943	2012091
1.4	3653179	3654677	5778284	7413679	2330880	4682439	3117190	3040493	7038190	2324666	3297052	3157472	5728630	4026498	2204891	3851867	3462477	5053632	4481562	2017062
1.6	3991447	3611829	5910880	7237642	2338707	4696566	3112639	3073593	7212270	2340247	3262376	3127231	5728008	4078047	2209441	3769085	3426575	4971304	4479333	2011712
1.8	3812500	3581367	5886242	7206003	2331360	4709527	3088622	3073818	6965143	2354280	3148592	3118750	5668510	4020713	2229894	3683803	3492210	4994932	4539619	2016894
2	3813277	3576290	5910710	7351605	2334554	4692264	3102531	2883074	7317143	2321128	3243610	3134433	5655533	4001057	2216615	3617188	3445811	4984333	4429581	2024138
2.2	3855580	3594012	5895322	7342692	2342389	4682943	3077224	2973195	7101730	2325448	3075805	3095278	5691473	4043447	2200317	3610915	3424842	5016952	4306209	2015915
2.4	3764634	3559283	5890695	7419465	2321368	4665294	3114329	2924546	7028127	2332135	3133714	3106511	5695673	4071939	2219397	3771761	3431147	5026165	4471695	2004727
2.6	3693598	3527220	5858822	7408763	2336862	4696666	3095343	3000831	7319667	2350910	3117986	3126084	5658283	4017986	2204977	3875686	3436322	5070487	4507505	2005377
2.8	3624027	3522924	5895018	7254615	2353829	4649276	3096861	3207030	7255682	2356409	3128063	3114497	5710111	4051863	2215174	3839756	3443724	5072866	4485181	2007393
3	3615000	3490448	5897738	7310685	2330630	4676984	3092075	3053108	7275524	2350799	3133331	3069795	5712453	4069325	2243226	3792835	3415998	4978946	4300438	2012170
3.2	3671089	3481923	5878548	7252458	2330013	4645440	3080587	3008459	7240889	2371211	3156620	3095362	5728547	4070396	2203744	3905594	3402084	4968464	4470438	2012609
3.4	3734643	3446381	5889022	7504365	2346994	4636418	3102864	3032035	7210571	2366612	3160320	3102514	5715925	4075420	2220470	3714367	3409006	4989507	4352628	2025809
3.6	3832000	3447689	5882035	7342425	2315425	4711806	3103299	2852441	7114333	2356193	3205206	3093593	5681055	4049408	2228974	3849802	3409083	5006782	4337600	2027245
3.8	3663902	3438985	5879056	7332742	2335489	4681786	3099059	2807948	7251778	2348764	3171881	3087834	5689760	4047132	2212289	3880137	3401497	5011707	4610362	2013944
4	3602062	3443094	5903719	7444147	2332670	4692493	3061543	2836701	7215159	2356901	3193561	3078583	5658655	4038368	2213165	3852912	3448336	5020911	4481695	2022795
4.2	3554429	3433184	5898386	7193829	2354702	4631776	3082373	2924450	7327000	2360684	3218411	3115374	5674084	4097359	2209519	4003628	3407060	5023664	4588552	2019086
4.4	3664009	3408804	5879144	7212324	2328356	4634819	3055334	2935515	7227968	2361289	3123456	3110911	5718632	4089938	2223439	3997584	3457823	4982908	4463010	2023073
4.6	3670822	3421961	5853792	7295084	2342281	4672031	3095688	2990693	7354064	2363468	3187972	3125036	5682277	4036071	2219433	3950175	3437350	5012680	4464324	2016955
4.8	3693714	3414643	5874081	7290836	2351481	4648079	3077355	3004312	7162905	2365114	3138495	3115887	5684545	4043061	2216930	3983605	3419912	5007035	4308343	2033117
5	3809500	3393374	5828477	7286237	2344885	4624006	3052632	3024476	7078603	2375142	3279547	3107712	5666870	4009583	2259435	3859703	3402381	5035188	4473524	2018181
5.2	3703473	3372623	5810204	7365201	2351693	4642678	3053531	2929342	7220682	2365011	3235003	3111490	5718135	4132004	2232200	3812561	3410935	5032141	4443695	2002217
5.4	3773616	3376641	5857632	7402642	2332281	4681138	3044119	3017394	7224032	2352690	3416495	3103163	5648934	4121966	2241148	3932165	3432115	4982349	4595295	2036397
5.6	3716000	3374858	5849986	7301605	2331618	4653401	3029172	2861065	7277936	2388866	3252585	3104912	5701418	4075671	2223496	3938087	3434883	4985496	4447429	2021447
5.8	3811991	3395926	5873486	7308596	2362395	4634798	3026955	2869117	7076699	2355294	3243610	3101730	5641794	4068609	2234270	3768407	3389584	5011077	4435581	2024913
6	3858107	3387021	5901610	7260201	2344135	4689976	3056069	2915714	7439508	2337767	3219143	3125336	5652617	4049249	2220930	3849383	3460907	5009298	4330552	2004538
6.2	3955750	3381013	5902206	7411756	2337626	4638958	3069270	2987541	7315428	2350614	3187972	3120666	5651960	4059149	2233118	3701456	3436138	5021012	4571772	2021538
6.4	3942536	3344891	5890419	7432910	2372864	4660824	3062766	3091974	7149508	2373109	3336627	3119514	5642471	4106412	2238390	3783796	3382503	5010913	4648495	2028558
6.6	3937143	3379008	5874925	7410502	2365024	4669008	3068854	3043766	7090841	2365558	3235003	3124901	5634376	4021880	2232109	3877180	3448268	5002730	4334572	2019137
6.8	3952018	3370399	5855628	7418294	2358354	4716257	3045886	3027766	7232587	2335634	3351331	3119582	5596642	4055782	2217776	3747553	3436989	4991282	4455295	2042847
7	3881241	3352416	5831801	7225769	2342609	4625276	3051372	3044623	7146619	2342148	3254174	3118060	5640513	4104931	2232123	3797896	3402625	5049662	4499181	2036801
7.2	3800304	3312939	5845966	7306739	2352059	4704767	3041490	3075619	7290048	2349283	3160320	3121707	5677656	4075100	2227328	3757378	3422326	5029594	4506495	2035899
7.4	3606027	3361123	5853610	7412425	2339487	4662487	3019518	2934424	7167127	2357878	3187972	3137552	5668690	4039391	2236377	3673742	3462570	4993408	4197962	2043206
7.6	3676598	3337677	5847837	7574014	2352441	4650553	3014739	3058649	7233889	2362185	3322307	3110101	5681297	4007948	2232872	3438156	3446978	5028408	4372552	2050057
7.8	3622571	3330338	5849391	7249866	2349754	4621851	3016597	3081498	7115920	2355739	3235003	3092164	5643798	4077190	2226480	3642690	3435485	5009686	4468381	2063981
8	3711393	3325616	5850478	7416121	2336199	4624673	3018853	3014701	7167254	2356860	3160320	3096570	5709293	4065706	2217301	3700190	3443473	5048713	4609067	2068078
8.2	3874607	3324050	5836071	7203094	2345889	4684453	2995193	3137688	7311461	2362588	3364808	3105907	5657780	4108344	2217919	3663925	3430200	5056631	4497543	2067074
8.4	3743125	3314634	5849697	7117274	2354745	4641472	2973874	3174849	7078222	2364890	3344648	3118167	5703616	4032087	2221252	3712005	3451523	5055288	4521333	2078444
8.6	3688473	3278892	5842060	7329231	2325838	4628631	2952855	3162494	7210286	2327006	3160320	3119096	5652909	4104656	2237422	3591479	3429818	5027722	4516362	2084548
8.8	3725179	3284337	5859167	7465117	2360368	4643731	2962036	3174225	7335444	2386518	3362056	3136348	5683503	4106808	2230542	3543209	3418840	5062689	4540019	2061552
9	3717768	3299653	5860072	7171990	2342730	4662541	2948489	3060052	7358159	2360549	3405735	3121229	5655087	4044928	2226008	3515442	3433401	5027894	4454171	2076185
9.2	3901420	3274803	5915807	7416790	2328492	4663820	2917432	2917437	7072333	2371092	3187972	3115095	5655264	4089177	2236074	3631921	3428260	5014144	4514362	2054352
9.4	3719000	3282666	5917415	7411288	2357602	4644237	2920757	3057247	7129556	2362207	3235003	3101159	5653052	4040458	2229350	3439642	3411771	4991833	4318171	2069507
9.6	3597098	3265626	5894469	7318278	2339350	4668652	2920366	3024796	7211143	2377154	3255875	3120243	5664814	4037865	2218355	3527340	3430452	5021363	4377257	2046663
9.8	3581625	3276574	5819932	7259849	2350181	4642549	2944115	3004442	7460730	2356875	3232899	3101796	5676761	4113340	2234454	3496479	3424087	5072546	4561657	2052959
10	3652857	3309690	5880881	7548596	2336904	4642398	2909872	3047455	7177032	2365536	3288990	3076584	5719520	4077954	2213222	3400290	3394573	5046444	4392667	2051070
10.2	3630339	3282515	5915807	7836840	2349754	4624673	2926885	2975541	7744905	2501486	3363394	3108654	5718632	4327156	2399891	3234832	3414674	5092700	4849048	2424043
10.4	3587196	3261527	5847837	7513027	2337626	4801422	2939073	2951437	7529889	2400875	3310237	3081357	5666870	4259876	2279162	3430099	3397150	5094006	4819695	2312795
10.6	3797759	3264949	6001619	7470903	2355726	4756273	2953740	2887013	7425317	2355583	3280606	3089322	5775271	4168154	2231630	3461227	3409795	5208182	4582514	2276078
10.8	3721286	3253549	5987783	7327659	2347430	4715387	2973704	2905307	7413460	2335455	3227443	3075830	5754563	4114432	2214457	3456372	3411656	5153635	4657314	2249926
11	3659973	3244596	5952866	7357208	2326493	4725451	2955118	2982468	7306540	2319845	3196976	3083044	5734603	4109807	2206875	3619131	3445677	5160496	4544133	2258397
11.2	3743223	3239054	5907291	7409615	2329105	4767014	2981001	3053940	7301334	2343096	3100885	3086077	5742217	4123233	2225862	3541883	3474831	5114227	4701105	2245390
11.4	3811000	3259341	5928420	7310267	2324030	4681119	3026478	2940571	7124873	2342645	3123108	3089936	5722401	4070014	2194164	3614238	3464032	5100764	4626648	2249190
11.6	3823982	3245907	5959785	7169749	2301201	4682405	3023127	3022840	7335651	2335544	3245017	3114784	5676854	4020351	2211776	3586456	3490829	5113472	4513524	2241144
11.8	3813018	3267000	5907507	7155853	2327612	4670203	3007766	3012511	7285619	2340666	3273108	3104968	5674366	4099632	2206828	3503384	3485961	5101956	4561733	2259407
12	3703741	3254627	5944395	7095267	2303841	4707410	2991082	3058875	7293079	2333421	3352760	3138387	5655351	4074284	2209253	3510770	3448247	5080448	4632686	2251706
12.2	3683804	3236164	5931859	7286622	2314524	4742964	3027952	2970615	7391603	2339336	3331944	3078304	5646841	4115365	2206426	3572119	3423487	5083864	4565143	2231187
12.4	3713482	3234159	5924824	7325719	2319157	4713659	3033821	2955818	7200063	2329303	3160320	3101662	5689365	4089759	2207164	3431296	3412686	5087561	4510971	2252656
12.6	3698964	3247588	5912006	7351438	2294641	4724764	3010144	2952900	7420143	2335753	3367631	3112559	5668928	4104662	2221059	3445008	3444384	5077200	4535276	2249574
12.8	3853232	3225613	5908482	7299749	2300263	4698246	2991008	2966000	7220968	2329674	3352906	3100964	5677096	4028640	2221674	3488186	3460650	5129538	4501086	2258557
13	3867598	3239518	5919327	7363763	2310218	4725965	3030524	2935255	7535048	2329257	3187972	3085352	5648120	4094463	2198952	3489703	3449808	5076532	4590476	2243297
13.2	3892679	3261397	5930078	7200267	2311271	4696020	3009343	3057914	7354952	2338474	3344105	3106903	5686014	4091877	2216458	3522607	3447976	5083915	4585581	2253717
13.4	3839946	3217281	5889496	7302826	2301771	4706121	3029875	2951818	7232270	2337817	3160320	3097533	5670167	4151395	2205961	3511532	3501581	5108350	4655238	2246969
13.6	3858884	3207419	5865546	7144431	2300906	4687805	3037531	2992000	7249619	2347517	3369512	3112197	5670752	4145003	2179730	3546197	3448228	5139515	4625124	2253379
13.8	3956821	3225907	5846984	7315050	2301497	4707314	3021222	3006182	7452270	2324954	3187972	3082708	5639061	4122459	2197244	3636967	3484065	5115565	4766248	2241406
14	3964188	3220306	5846204	7104984	2310361	4705103	3008674	3056719	7575190	2325799	3213568	3113575	5646959	4045950	2199016	3526319	3461675	5092700	4668248	2257605
14.2	3859196	3213968	5866484	7133930	2300356	4667597	3046725	2996268	7343921	2322057	3209310	3127743	5670276	4057789	2206570	3683308	3474611	5094006	4457372	2249916
14.4	3891339	3191634	5881006	7167792	2327781	4704365	3036319	3054546	7452444	2340413	3129930	3080129	5659493	4138970	2219743	3441898	3487912	5127284	4797010	2252823
14.6	3616232	3206135	5894448	7149766	2314584	4683946	3035967	3052978	7411381	2341324	3053275	3102622	5751271	4116271	2203772	3533925	3440820	5125612	4704133	2248507
14.8	3844509	3180151	5898466	7228863	2308055	4719480	3028518	3095810	7491683	2332148	3182307	3109653	5669446	4139204	2213872	3604619	3468120	5131340	4551619	2264141
15	3805643	3178635	5905677	7282843	2330893	4709807	3015227	3195965	7101905	2333651	3316000	3097876	5687914	4100899	2209570	3448925	3468243	5122606	4407486	2248707
15.2	3736732	3191270	5917245	7205435	2315297	4714986	3056767	3060182	7524889	2323859	3212216	3112829	5701411	4076412	2206657	3544939	3460795	5143511	4617905	2260389
15.4	3742857	3209673	5901985	7355502	2307218	4652858	3047092	3169775	7278286	2337675	3235003	3113467	5670276	4112083	2208751	3508201	3446292	5153187	4483505	2240754
15.6	3769116	3216017	5907294	7232308	2314815	4703726	3016512	3043195	7248571	2329606	3263826	3112975	5691069	4067335	2206258	3442736	3463922	5120438	4441371	2254634
15.8	3884902	3250373	5900516	7161655	2308454	4730830	3043525	3085186	7360333	2335811	3059338	3132387	5669722	4147872	2207576	3456936	3433705	5152293	4543409	2244855
16	3844232	3193551	5904944	7308210	2335328	4724548	3039824	3161437	7356429	2321083	3132112	3098758	5649386	4103753	2216590	3512713	3459766	5133398	4604743	2272558
16.2	3959339	3225609	5894448	7537274	2337626	4817566	3073947	3030087	7562460	2341324	3112544	3113259	5704180	4196488	2221059	3532378	3484633	5182310	4591124	2258872
16.4	3620545	3250393	5889496	7299164	2327612	4776423	3065323	3016805	7382889	2337675	3028223	3139765	5733521	4154525	2231630	3576463	3446100	5155242	4621752	2250849
16.6	3753348	3195901	5866484	7176873	2336909	4769338	3079198	3057706	7236143	2354613	3086188	3134836	5712584	4076274	2231492	3572088	3422272	5105237	4589257	2237933
16.8	3813107	3201348	5978570	7239966	2306951	4777011	3078354	2983377	7572365	2329406	3092836	3094808	5701937	4115813	2223098	3643232	3453655	5082491	4548972	2239171
17	3701214	3213681	5977505	7164247	2326824	4777998	3046082	2983957	7289952	2341465	3291094	3102675	5658575	4137707	2215598	3505541	3449178	5075898	4464895	2242512
17.2	3719446	3239377	5954781	7098043	2314117	4749116	3029155	3091472	7390063	2314413	3162571	3123597	5699452	4136725	2219245	3531082	3458120	5102105	4592209	2247348
17.4	3844982	3206756	5929171	7263461	2303857	4676291	3062034	3116277	7371206	2314110	3235003	3112568	5690608	4085145	2214772	3460404	3457643	5030818	4470038	2254287
17.6	3776786	3211514	5901301	7076672	2319414	4705454	3050955	2992355	7431143	2338151	3220571	3100123	5698484	4136739	2216927	3551037	3474011	5108559	4559771	2246719
17.8	3683170	3170904	5918397	7031422	2322469	4697279	3078233	3096987	7450920	2326612	3186836	3085260	5736851	4094790	2227059	3493925	3455282	5095564	4672952	2257605
18	3744009	3187127	5898439	7201321	2320640	4725362	3066884	3024476	7505079	2337499	3157059	3076646	5712211	4082696	2211616	3549131	3488881	5078365	4571448	2239176
18.2	3581929	3183194	5894033	7349632	2308064	4742969	3064269	3027498	7483730	2324329	3093568	3095688	5704180	4139576	2212443	3607912	3436115	5078518	4492419	2228553
18.4	3809062	3179846	5864330	7090920	2302545	4715757	3035335	2925290	7551683	2337278	3072481	3075847	5711759	4132173	2233501	3627111	3424659	5100408	4519181	2238988
18.6	3766196	3165413	5873074	7186338	2303156	4696201	3035560	2914130	7565365	2338436	3046599	3051054	5717354	4069019	2210346	3535907	3383186	5107406	4506343	2235263
18.8	3791420	3157889	5876368	7235786	2300361	4747502	3050431	2974251	7432905	2323940	3080369	3094637	5678885	4072521	2222672	3580564	3411970	5142986	4506476	2233643
19	3833062	3191731	5867755	7301605	2319429	4751910	3059691	2903325	7398206	2342597	3162090	3075877	5669908	4101677	2225744	3489093	3423300	5134491	4559619	2243540
19.2	3765161	3203562	5875164	6998578	2310078	4727862	3085678	2847593	7333476	2339782	3137777	3058791	5681457	4156319	2205826	3512972	3436159	5119606	4714514	2250802
19.4	3657036	3197694	5889102	7183813	2312510	4706168	3099607	2979498	7545492	2339160	3266739	3081513	5682003	4117349	2220332	3482683	3486609	5108405	4510914	2243297
19.6	3676518	3208161	5886318	7073545	2338518	4714077	3100963	2976450	7544873	2333912	3309575	3058719	5704180	4124156	2212864	3522028	3437926	5124528	4591867	2228533
19.8	3730982	3206643	5902545	7252960	2311107	4709028	3099384	3054216	7388381	2318651	3367944	3055880	5643773	4172954	2205823	3499619	3428786	5124283	4558210	2235243
20	3706527	3176298	5903619	7326121	2316685	4701509	3116040	3075974	7453000	2318082	3425707	3028929	5652666	4178636	2211808	3585968	3453602	5081205	4688952	2252225
20.2	3701214	3195901	5902180	6989348	2300174	4676086	3085678	3076381	7497524	2325923	3235003	3075877	5647513	4121591	2216875	3682012	3430597	5093918	4603047	2232940
20.4	3719446	3221487	5959976	7154532	2293346	4672274	3117190	3021957	7580286	2296942	3529261	3102888	5651400	4107552	2197235	3486570	3474602	5066023	4577333	2240520
20.6	3844982	3230746	5938823	7112441	2312558	4730841	3112639	2959853	7531651	2318631	3450655	3069391	5643347	4149945	2213966	3494314	3484752	5084065	4487543	2229227
20.8	3776786	3238930	5910552	7301973	2312114	4655036	3088622	3037983	7477111	2334575	3440871	3052077	5640050	4153915	2207185	3366913	3493538	5053108	4543333	2249956
21	3683170	3238376	5925420	6966973	2329335	4725391	3102531	3009593	7274698	2320049	3168300	3055162	5673657	4145555	2210563	3391852	3471630	5075938	4493657	2231192
21.2	3744009	3238585	5914241	6989833	2315620	4712803	3077224	2966242	7494857	2309641	3245415	3037380	5642001	4089914	2214517	3501616	3459636	5113024	4469771	2239176
21.4	3809402	3201212	5864106	7228729	2326526	4711877	3114329	2965368	7422238	2302935	3314732	3053112	5652829	4171033	2198960	3360800	3487751	5107530	4574971	2228553
21.6	3847794	3206353	5894404	7422876	2297033	4764649	3095343	2914130	7632349	2328212	3190272	3069625	5677203	4102555	2211959	3360244	3454633	5143283	4396305	2238988
21.8	3745527	3218032	5908248	7213160	2314217	4742099	3096861	3106563	7650238	2324235	3297638	3032200	5704180	4127156	2196828	3202492	3430597	5099565	4530971	2235263
22	3631705	3220982	5876656	7310402	2308404	4750227	3092075	3012511	7618317	2321868	3311324	3055082	5723578	4151088	2195323	3373651	3429785	5107917	4563733	2233643
22.2	3817589	3243770	5893692	7165435	2331042	4739080	3080587	3058875	7508984	2333075	3324258	3061218	5716679	4124294	2213814	3324543	3433956	5100478	4536476	2243540
22.4	3774491	3218707	5901513	7222491	2312845	4738090	3102864	2970615	7329810	2316962	3235003	3067737	5687399	4127545	2211046	3341120	3471987	5097501	4384762	2250802
22.6	3722214	3205865	5876945	7277375	2307306	4712109	3103299	2955818	7203682	2315312	3351331	3045896	5670276	4168626	2222622	3294154	3457523	5101289	4614419	2243297
22.8	3632661	3229467	5917222	7161706	2324420	4690730	3099059	2952900	7536461	2319240	3254174	3092744	5659493	4138833	2201511	3322889	3484107	5067196	4476971	2228533
23	3692670	3208572	5915668	7269666	2325090	4703521	3061543	2966000	7466349	2322483	3160320	3097389	5751271	4141484	2199225	3371608	3421056	5112476	4524914	2235243
23.2	3561080	3225058	5924705	7351288	2322000	4705586	3029875	2935255	7520762	2342701	3187972	3100849	5669446	4131136	2191488	3486654	3425723	5098466	4504857	2252225
23.4	3589786	3210480	5923688	7153461	2326123	4712455	3037531	3057914	7326492	2343527	3322307	3049337	5687914	4119167	2202248	3411395	3454383	5108345	4461600	2232940
23.6	3662938	3198275	5911573	7104331	2300929	4724558	3021222	2951818	7676873	2331549	3235003	3093406	5701411	4102455	2201154	3506494	3433052	5099919	4516209	2240520
23.8	3682643	3213084	5937285	7121388	2330542	4742469	3008674	2992000	7596762	2355603	3160320	3091879	5670276	4140220	2205398	3513346	3455563	5098335	4615695	2229227
24	3771571	3195210	5902532	6983913	2316585	4743951	3046725	3006182	7524730	2330423	3364808	3096110	5691069	4065327	2218745	3437912	3467045	5104120	4408819	2249956
24.2	3757812	3162044	5905844	7196304	2313160	4771049	3036319	3056719	7496111	2313261	3344648	3073292	5669722	4107076	2199956	3449977	3442095	5105887	4603429	2231192
24.4	3650822	3209999	5877278	7223779	2301631	4708412	3035967	2996268	7595365	2322358	3160320	3082010	5649386	4091990	2206541	3426890	3433544	5087726	4560419	2239004
24.6	3694759	3190424	5859484	7096404	2335255	4726378	3028518	3054546	7631190	2332683	3182307	3098914	5704180	4131205	2189093	3481181	3454471	5137213	4568171	2229763
24.8	3676804	3202932	5843669	7176990	2321790	4768586	3015227	3052978	7566603	2305155	3316000	3133456	5733521	4097156	2211358	3334825	3441789	5083272	4639810	2232940
25	3742536	3185561	5908635	7315769	2333653	4732889	3056767	2952900	7410762	2320594	3212216	3068847	5712584	4108857	2206626	3419726	3458463	5085548	4581581	2245701
25.2	3504803	3194602	5873780	7325585	2298652	4750022	3047092	2914130	7475508	2316696	3235003	3099783	5701937	4107101	2198602	3327630	3451411	5073341	4586933	2242348
25.4	3643491	3173342	5927068	7162040	2322388	4758171	3016512	3060182	7457556	2321557	3263826	3117603	5658575	4138633	2186058	3291608	3416305	5048364	4430267	2238988
25.6	3674241	3172819	5875315	7297007	2303171	4763900	3043525	2952900	7345698	2346060	3059338	3111273	5699452	4150282	2212590	3392919	3422885	5086953	4508362	2235263
25.8	3722732	3192636	5824508	7084197	2320001	4730487	3092075	3043195	7651334	2337296	3132112	3148153	5690608	4078351	2193670	3464406	3400760	5106567	4428819	2233643
26	3718545	3169837	5891783	7132124	2316465	4727042	3080587	3085186	7553095	2342993	3112544	3145993	5698484	4109277	2202144	3369535	3420967	5110255	4640343	2243540
26.2	3569759	3154174	5891483	7130134	2317416	4746887	3102864	3161437	7616794	2323093	3028223	3133489	5736851	4142328	2215882	3361113	3428270	5124240	4605867	2250802
26.4	3742303	3180551	5914630	7226187	2343408	4685634	3103299	3030087	7608619	2347385	3086188	3127889	5712211	4061581	2214962	3532035	3420275	5156830	4503828	2243297
26.6	3704839	3186349	5904135	7495284	2295218	4733142	3099059	3016805	7487762	2325835	3092836	3110263	5704180	4079153	2194178	3567157	3397545	5095308	4660876	2228533
26.8	3838866	3175935	5880735	7268696	2318066	4691296	3061543	3057706	7471190	2335343	3291094	3143833	5711759	4123819	2217515	3504261	3424422	5112111	4538286	2235243
27	3806804	3184586	5899583	7232709	2311080	4644464	3029875	2983377	7533238	2332548	3162571	3150648	5717354	4075038	2210104	3610678	3416439	5094646	4378038	2252225
27.2	3701214	3155758	5880566	7232960	2302700	4639393	3037531	2983957	7643921	2327317	3235003	3145109	5678885	4082283	2201064	3475838	3399359	5121946	4483848	2232940
27.4	3719446	3163453	5892474	7166204	2315563	4711924	3021222	3057706	7448921	2333688	3270711	3153659	5669908	4152383	2214894	3501479	3391996	5098874	4679981	2240520
27.6	3844982	3201613	5906151	7141906	2326335	4708990	3008674	2983377	7434730	2315263	3324334	3126657	5681457	4143719	2208990	3452942	3431332	5110645	4434895	2229227
27.8	3776786	3174857	5932093	7373813	2308190	4736174	3046725	2983957	7541968	2308883	3234251	3132632	5682003	4080813	2183320	3291387	3456656	5084346	4517181	2249956
28	3683170	3156280	5884161	7342425	2323719	4710864	3046725	3091472	7482079	2331116	3288655	3146210	5704180	4111036	2194607	3304505	3444946	5086739	4619276	2231192
28.2	3744009	3162051	5908449	7418578	2313700	4710757	3036319	3116277	7389460	2323792	3210648	3147779	5642001	4112565	2201083	3212599	3438852	5082203	4479333	2262887
28.4	3829482	3164143	5903514	7373779	2300208	4701282	3035967	2992355	7407952	2307865	3275861	3173705	5652829	4164728	2197796	3234497	3424726	5112786	4604438	2239176
28.6	3677321	3154970	5876749	7374883	2312872	4714928	3028518	2952900	7436016	2326789	3208613	3169457	5677203	4164098	2213818	3230488	3451106	5075998	4664514	2228553
28.8	3668518	3175048	5866913	7357141	2305228	4688705	3015227	3024476	7621714	2325218	3266739	3145837	5704180	4140961	2208681	3235930	3423059	5061671	4636362	2238988
29	3831884	3134036	5926124	7404883	2311840	4687392	3056767	3027498	7548095	2322906	3309575	3152180	5723578	4133688	2209426	3314116	3433752	5108303	4547752	2235263
29.2	3559036	3142984	5868545	7353763	2308451	4714329	3047092	2925290	7376254	2317299	3367944	3181062	5716679	4147576	2201214	3400800	3403104	5085766	4605524	2233643
29.4	3549491	3131877	5886874	7341254	2318211	4690022	3016512	2914130	7415682	2322922	3425707	3143906	5687399	4140912	2211972	3352264	3441454	5070968	4477505	2243540
29.6	3520179	3085483	5893516	7275134	2308059	4713432	3043525	2974251	7498174	2327381	3235003	3162585	5670276	4147094	2174190	3531463	3409555	5043143	4408248	2250802
29.8	3596804	3119766	5929975	7207859	2326012	4707095	3039824	2903325	7571079	2334048	3529261	3159145	5659493	4119273	2206488	3508567	3395791	5096913	4648952	2243297
30	3592348	3161634	5867996	7145167	2323825	4748765	3073947	2847593	7397794	2315280	3450655	3143644	5751271	4168485	2214079	3493925	3402587	5102829	4625562	2228533
30.2	3559205	3105195	5863336	7442826	2314641	4761784	3065323	2979498	7676556	2326004	3440871	3148382	5669446	4082290	2206311	3549131	3418071	5085411	4246533	2235243
30.4	3730973	3096621	5913802	7271555	2327659	4720815	3079198	2976450	7369651	2317574	3168300	3141051	5687914	4089532	2199911	3607912	3439930	5096866	4479848	2252225
30.6	3693375	3115658	5898519	7202491	2298123	4721851	3078354	3054216	7551794	2314308	3291094	3143165	5701411	4165826	2213921	3627111	3398549	5090671	4525733	2232940
30.8	3776205	3142667	5876421	7213662	2302931	4705079	3046082	3075974	7569032	2296961	3162571	3127282	5670276	4138251	2198181	3535907	3404204	5104199	4574667	2240520
31	3737125	3128885	5857026	7335986	2322162	4709234	3029155	2952900	7670635	2335845	3235003	3133489	5733521	4091680	2200284	3580564	3450101	5103895	4475200	2229227
31.2	3756848	3144894	5867152	7185000	2299717	4657464	3062034	3021957	7664318	2308748	3270711	3127889	5712584	4066873	2206532	3489093	3423683	5115060	4489524	2249956
31.4	3715929	3122868	5902320	7168729	2299567	4670956	3050955	2959853	7686889	2325450	3324334	3110263	5701937	4149979	2190333	3512972	3397769	5103601	4648095	2231192
31.6	3684929	3124984	5829516	7269766	2313820	4670637	3078233	3037983	7404746	2321164	3234251	3143833	5658575	4105461	2206566	3482683	3426082	5121910	4619505	2239004
31.8	3700795	3134364	5872700	7336037	2309196	4700928	3066884	3009593	7611730	2314811	3288655	3150648	5699452	4110651	2192438	3522028	3470272	5102654	4525562	2229763
32	3502563	3149376	5886247	7123378	2295067	4683582	3064269	2966242	7598333	2332938	3210648	3145109	5690608	4118137	2215481	3714367	3820122	5203105	4899200	2378797
32.2	3596804	3154970	5926196	7216923	2309568	4717610	3035335	2965368	7506572	2323643	3275861	3153659	5698484	4193457	2219621	3849802	3822585	5209214	4903524	2362722
32.4	3592348	3175048	5869640	7381070	2317972	4711938	3035560	3076381	7584873	2317952	3208613	3126657	5736851	4045244	2218420	3880137	3861544	5176918	4901010	2321382
32.6	3596295	3134036	5871859	7051923	2320821	4702757	3050431	2914130	7702222	2327968	3235003	3132632	5712211	4071377	2204514	3852912	3843175	5188792	4821371	2328668
32.8	3576232	3142984	5878412	7471422	2317908	4672958	3059691	3012511	7512286	2336251	3388857	3269457	6091069	4272349	2260787	4003628	3807916	5225252	4895752	2320057
33	3428071	3190374	5884938	7359415	2269781	4708079	3085678	3058875	7590175	2355378	3623756	3345837	6003234	4619019	2299873	3997584	3899565	5257190	4844838	2312511
33.2	3483196	3194651	5880270	7300685	2287671	4722244	3099607	2970615	7458254	2338309	3650042	3552180	6070143	4654466	2255703	3950175	3826246	5240004	4813581	2302761
33.4	3547714	3145844	5862230	7248244	2306776	4722847	3100963	2955818	7427889	2339034	3708669	3581062	6055818	4614339	2267892	3983605	3822585	5220164	4856000	2321578
33.6	3515089	3157206	5872114	7462174	2310279	4703060	3099384	2914130	7662809	2331882	3721310	3443906	6036423	4629074	2263944	3859703	3829258	5223909	4832933	2306780
33.8	3502536	3138215	5860517	7175117	2324244	4752924	3116040	2952900	7537714	2331674	3667547	3462585	6090916	4665685	2305344	3812561	3803613	5215305	4868343	2310933
34	3535705	3142975	5868327	7457124	2310785	4888428	3220100	3193983	7755524	2400275	3706474	3459753	6069932	4697259	2282162	3839657	3827515	5244712	4875714	2313111
34.2	3613134	3135502	5873296	7497040	2331158	4939409	3270832	3180156	7820746	2521840	3578007	3448959	5995480	4697924	2283808	3851867	3820209	5263105	4783371	2315009
34.4	3585911	3132025	5886321	7208294	2320607	4937278	3282428	3149524	8319524	2392039	3501610	3441479	5975598	4608113	2316332	3769085	3825330	5292858	4611086	2336058
34.6	3745929	3122122	5922103	7308528	2306365	4788378	3279009	3247126	8500428	2374153	3530565	3309274	5964099	4695823	2274888	3849802	3812424	5224503	4653371	2295950
34.8	3584125	3140490	5901771	7390201	2298065	4848319	3263338	3216312	8346238	2395421	3504467	3300347	5968839	4670448	2301357	3859703	3826054	5230541	4570057	2304602
35	3611946	3121885	5890579	7386555	2279624	4901468	3283755	3238632	8307429	2398451	3588167	3293270	5947938	4689218	2289487	3852912	3804335	5302017	4472876	2299789
35.2	3554027	3128622	5864147	7151221	2304147	4860425	3328517	3234875	8215032	2415083	3565310	3323221	5933043	4690368	2290359	3771761	3886256	5269670	4487333	2318003
35.4	3425938	3122052	5883759	7267742	2286274	4899687	3321585	3207290	8076111	2414560	3579763	3331936	5938839	4655413	2310844	3875686	3838458	5246098	4445638	2321789
35.6	3388411	3141953	5888167	7311171	2286859	4929838	3331257	3321403	8435873	2393081	3663861	3334661	5926858	4664370	2293088	3839756	3862704	5253066	4607771	2315199
35.9	3562348	3131721	5841934	7403528	2295040	4895196	3337798	3359255	8283524	2395792	3613429	3355456	5895133	4681371	2308205	3792835	3861949	5290194	4243505	2304180
36	3552313	3135144	5868997	7406572	2278118	4898040	3321237	3403913	8307016	2389504	3636878	3344170	5868445	4620031	2301242	3905594	3850876	5237048	4520114	2309407
36.2	3601063	3142021	5870527	7331605	2291992	4884352	3346003	3418433	8346238	2404868	3684948	3393270	5852726	4660234	2314653	3714367	3841893	5244722	4446705	2330576
36.4	3619866	3124767	5842729	7346806	2310076	4822590	3352406	3376389	8307429	2391255	3626021	3323221	5841504	4626391	2297684	3849802	3815539	5241841	4575562	2320775
36.6	3557241	3122089	5850525	7425217	2303243	4867435	3331807	3349117	8215032	2376172	3653986	3331936	5852984	4649088	2300782	3880137	3849491	5246044	4560457	2324536
36.8	3689205	3091660	5838128	7371672	2306375	4875416	3335226	3347022	8076111	2374380	3749617	3334661	5818839	4687318	2290393	3852912	3799582	5274592	4454210	2308568
37	3725473	3098746	5862798	7147826	2293472	4913195	3326880	3320242	8435873	2404679	3709004	3355456	5805001	4609931	2301038	3627111	3774991	5221213	4530343	2335490
37.2	3682527	3116306	5876259	7331455	2299709	4886689	3344657	3316987	8283524	2397668	3853937	3344170	5813358	4658925	2329919	3535907	3788981	5226583	4370381	2316857
37.4	3671223	3114332	5853209	7252491	2300405	4841431	3318729	3248875	8307016	2380736	3847164	3347895	5833494	4628264	2318746	3580564	3782129	5221686	4590933	2337395
37.6	3507536	3098017	5885271	7357475	2303035	4893179	3315706	3216312	8220365	2381146	3855296	3339279	5761595	4613860	2321498	3489093	3787044	5222344	4364286	2325741
37.8	3661321	3076262	5897672	7294365	2295382	4894913	3301270	3158087	8346238	2384119	3688446	3295098	5775074	4613877	2307000	3512972	3782603	5254204	4442229	2331865
38	3647169	3101439	5881703	7249331	2271196	4944352	3334580	3236303	8307429	2401664	3757213	3296657	5789068	4613409	2299313	3482683	3783840	5220988	4708857	2326186
38.2	3515098	3067979	5899913	7362174	2308603	4908789	3314748	3180156	8215032	2382181	3712432	3266741	5775494	4623499	2307297	3522028	3783974	5233366	4462152	2322092
38.4	3695830	3098870	5921098	7310903	2286434	4873719	3339734	3149524	8076111	2392592	3660934	3252628	5764977	4481880	2322137	3499619	3784347	5215305	4310629	2344660
38.6	3680598	3071370	5948498	7277893	2293851	4857748	3293232	3247126	8435873	2372955	3643094	3276525	5782151	4303306	2298047	3585968	3785411	5244712	4481010	2316032
39	3688277	3066076	5917949	7338612	2290581	4828512	3297907	3216312	8283524	2391832	3679471	3249251	5804305	4369346	2319717	3682012	3786397	5263105	4441962	2331396
39.2	3672500	3079675	5907708	7229064	2304464	4829127	3307207	3238632	8307016	2382917	3566342	3243302	5792130	4393182	2314168	3486570	3785770	5292858	4543619	2331108
39.4	3719089	3089801	5896545	7459548	2289096	4854880	3293564	3234875	8220365	2381405	3489435	3227078	5828303	4357700	2321378	3494314	3773943	5224503	4587200	2327573
39.6	3871982	3075661	5894049	7299297	2292152	4824422	3305725	3207290	8171397	2391899	3429840	3234623	5815652	4337280	2329365	3366913	3783828	5230541	4448781	2323666
39.8	3779366	3116213	5906566	7305234	2287326	4879154	3327068	3321403	8169968	2387980	3564202	3228625	5767408	4366680	2327271	3391852	3772082	5302017	4371714	2329817
40	3810741	3123578	5912368	7163261	2270225	4833724	3321885	3303714	8222191	2409987	3580195	3220059	5752292	4354883	2317440	3501616	3756223	5269670	4398343	2333955
40.2	3837821	3087496	5925534	7397107	2283857	4828095	3332822	3233654	8223953	2389415	3532077	3220967	5750844	4335027	2313049	3360800	3741041	5246098	4357905	2319847
40.4	3786929	3104468	5903092	7172592	2301902	4855538	3333894	3180156	8195905	2401905	3546822	3232000	5787776	4356990	2332105	3360244	3735188	5253066	4411238	2321052
40.6	3823446	3119018	5876643	7320016	2285259	4843366	3323964	3312320	8444302	2384308	3444536	3198120	5760325	4386202	2329391	3202492	3746671	5290194	4405981	2322375
40.8	3610893	3080591	5856951	7404164	2280829	4884844	3343163	3354095	8219778	2407329	3442195	3221737	5784953	4329976	2334798	3373651	3738633	5237048	4366648	2337184
41	3654527	3087166	5877940	7509130	2282765	4906624	3340513	3208597	8311508	2402628	3478453	3223181	5824103	4341339	2320791	3324543	3720211	5244722	4614914	2338484
41.2	3606955	3087987	5917538	7364799	2287945	4905965	3342179	3207290	8346238	2381820	3549380	3248619	5790078	4367200	2325654	3341120	3741384	5241841	4315943	2318394
41.4	3731500	3111999	5962136	7405067	2275663	4843328	3285930	3269325	8307429	2395132	3447665	3248469	5787116	4343023	2337718	3294154	3733302	5246044	4385048	2340303
41.6	3772714	3084777	5974069	7653328	2289289	4853915	3314663	3192788	8215032	2408638	3370460	3217845	5775182	4333433	2335930	3322889	3738421	5274592	4373162	2348737
41.8	3656857	3072456	5947542	7496338	2298844	4860584	3339334	3180156	8076111	2390384	3394237	3229902	5756847	4264849	2320900	3371608	3730365	5221213	4425124	2334602

## Sheet: Fig.3E and Fig. 3F
23C09VGlut response to light activation of R21G11LexA
Time	Baseline						No retinal						Activation
0.2	4468986	4518973	2723138	8519136	2798950	3850148	2886078	3467729	3182969	6372045	5680521	3239987	5468986	4518973	2723138	9038091	2798950	3850148
0.4	4228935	4060580	2618309	8766364	2772749	3919377	2681906	3322831	3042910	6161767	5675388	3229377	5228935	5060580	2618309	9140318	2772749	3774268
0.6	4163440	4175848	2574018	8816159	2757361	3912287	2588388	3252739	3015471	6105065	5651516	3231090	5163440	4175848	2574018	9038091	2757361	3740858
0.8	4183298	4258259	2651908	8499841	2768033	3977481	2552230	3239987	2984171	6008752	5677691	3242183	5183298	5258259	2651908	8966568	2768033	3795301
1	4161819	4319286	2601824	8605750	2774683	3944078	2552163	3229377	2970851	6009426	5655581	3239016	5161819	4319286	2601824	9087682	2774683	3948432
1.2	4149500	4986920	2605982	8773886	2776643	3931170	2517341	3231090	2974676	5988427	5689599	3243517	5149500	4986920	2605982	9109909	2776643	3795062
1.4	4181000	4491830	2587757	8753182	2778463	3880237	2527665	3222003	2986025	5967518	5655837	3216985	5181000	4491830	2587757	9141386	2778463	3797130
1.6	4222014	4563482	2557498	8671295	2776643	3908297	2533697	3235119	2983378	5978442	5648752	3252869	5222014	4563482	2557498	9042727	2776643	3914098
1.8	4184017	4494375	2527275	8965000	2612054	3962792	2525726	3223011	2974667	5937985	5667464	3214608	5184017	4494375	2527275	8965000	2768033	3962792
2	4254975	4618438	2696995	8975182	2764571	3907586	2501986	3237682	2955077	5939042	5650047	3241028	5254975	4618438	2696995	8975182	2762793	3907586
2.2	4242469	4273616	2597324	8965000	2799290	3908297	2481324	3237703	2980515	5902227	5669636	3248503	5242469	4273616	2597324	8965000	2798950	3908297
2.4	4253815	4538304	2521097	8681318	2808041	3976246	2499791	3236593	2962995	5927266	5649904	3216149	5253815	4538304	2521097	9042727	2771364	3976246
2.6	4201482	4318705	2607268	8883455	2774683	3880237	2519581	3232309	2945492	5937620	5686353	3217928	5201482	4318705	2607268	9342750	2774683	3880237
2.8	4216835	4560179	2586401	8534250	2776643	3977583	2493718	3217438	2952681	5908612	5724017	3220565	5216835	4560179	2586401	9084387	2776643	3977583
3	4217870	4434732	2553976	8671432	2778463	3850148	2501922	3216149	2959031	5915837	5731207	3250060	5217870	4434732	2553976	9199955	2778463	3850148
3.2	4238577	4665625	2673089	8965000	2772301	3914098	2489569	3217928	2937143	5880762	5698453	3239016	5238577	4665625	2673089	8965000	2772301	3914098
3.4	4219731	4719598	2595926	8605750	2757361	3940858	2479699	3220565	2983878	5927139	5715768	3243517	5219731	4719598	2595926	9042727	2757361	3940858
3.6	4257752	4731964	2626541	8815477	2776643	3995062	2462822	3250060	2942739	5887172	5702613	3241028	5257752	4731964	2626541	8815477	2776643	3995062
3.8	4182629	4473259	2627736	8832568	2768033	3997130	2482614	3225511	3012568	5926265	5661659	3251756	5182629	4473259	2627736	8832568	2768033	3997130
4	4261133	4910179	2613920	8838432	2762793	3914098	2477712	3247861	2972236	5880395	5697308	3230549	5261133	4910179	2613920	8838432	2762793	3914098
4.2	4214895	4179420	2591440	8616659	2798950	3962792	2483998	3230848	2982419	5921406	5662111	3256313	5214895	4179420	2591440	9101295	2798950	3962792
4.4	4210024	4185446	2702306	8747159	2798950	3907586	2483003	3215427	2975059	5842916	5650047	3248084	5210024	4654598	2702306	9040273	2798950	3907586
4.6	4240917	4242277	2612481	8846477	2771364	3976246	2496044	3251125	2943596	5875598	5669636	3252639	5240917	4257054	2612481	8846477	2771364	3976246
4.8	4210201	3938929	2636653	8989818	2812354	3908297	2485069	3238633	2953432	5883093	5649904	3234358	5210201	4916696	2636653	8989818	2812354	3908297
5	4270677	4073125	2685416	8975182	2793332	3908297	2466259	3249674	2967675	5870808	5686353	3240066	5270677	4298170	2685416	8975182	2793332	3908297
5.2	4221860	4258259	2602963	8605750	2762793	3880237	2464059	3225358	2956211	5851324	5724017	3250074	5221860	4775446	2602963	9042727	2762793	3880237
5.4	4241144	4093125	2546143	8876477	2798950	3908297	2470851	3249598	2953413	5859857	5681016	3247070	5241144	4093125	2546143	8876477	2798950	3908297
5.6	4206273	4199018	2677708	8965000	2771364	3914098	2495260	3237122	2933211	5872311	5692570	3245263	5206273	5199018	2677708	8965000	2771364	3914098
5.8	4170598	4314062	2682208	8832614	2774683	3955417	2501789	3232153	2947209	5868621	5653112	3239016	5170598	4314062	2682208	8832614	2774683	3955417
6	4174253	4988125	2598805	8702318	2776643	3974149	2471091	3244221	2963558	5868033	5673818	3243517	5174253	4988125	2598805	8702318	2776643	3974149
6.2	4150689	4186027	2699057	8842704	2772301	3908297	2492195	3213359	2960217	5867695	5687064	3216985	5150689	4186027	2699057	8842704	2772301	3908297
6.4	4197155	4244464	2607862	8773886	2824268	3980237	2473165	3258483	2975975	5853221	5719490	3249550	5197155	5029911	2607862	8773886	2824268	3980237
6.6	4282434	4286696	2579050	8753182	2828708	3919377	2512640	3249550	2989941	5863654	5713771	3223887	5282434	4286696	2579050	8753182	2828708	3919377
6.8	4269476	4933661	2731761	8671295	2833347	3912287	2501040	3223887	2939825	5867102	5686353	3247773	5269476	4933661	2731761	8671295	2833347	3912287
7	4190447	4060446	2680887	8724432	2812191	3977481	2472057	3247773	2971846	5869796	5724017	3211849	5190447	4060446	2680887	8724432	2812191	3977481
7.2	4193842	4699732	2583829	8617341	2819488	3944078	2476454	3211849	2980600	5866378	5731207	3272802	5193842	4699732	2583829	8617341	2819488	3944078
7.4	4179503	4144911	2726478	8679500	2813184	3931170	2485402	3272802	2967316	5861489	5698453	3238973	5179503	4144911	2726478	8679500	2813184	3931170
7.6	4238894	4760045	2685786	8746023	2826903	3880237	2483647	3238973	2955850	5875923	5655581	3222332	5238894	4760045	2685786	8746023	2826903	3914098
7.8	4237486	4439554	2658938	8616659	2827729	3908297	2480335	3222332	2967544	5867689	5689599	3322831	5237486	4439554	2658938	8616659	2827729	3928195
8	4300588	4405982	2749888	8747159	2794337	3923552	2474036	3234881	2931226	5854440	5655837	3252739	5300588	4405982	2749888	8747159	2794337	3996710
8.2	4201047	4260179	2691461	8519136	2801674	3947905	2487102	3226677	2943917	5852189	5649904	3239987	5201047	4260179	2691461	8519136	2801674	3995822
8.4	4270642	4212723	2635996	8766364	2776643	3908297	2493673	3241007	2942678	5834812	5686353	3229377	5270642	4212723	2635996	8766364	2776643	3908297
8.6	4268196	3856295	2623347	8816159	2768033	3923761	2489918	3225317	2962925	5814536	5724017	3231090	5268196	3856295	2623347	8816159	2768033	3923761
8.8	4147584	3909643	2656380	8499841	2772749	3931024	2485008	3259421	2958622	5867027	5681016	3222003	5147584	3909643	2656380	8499841	2772749	3931024
9	4209459	3888616	2660706	8605750	2812354	3928686	2490592	3228272	2950081	5860750	5692570	3252377	5209459	3888616	2660706	8605750	2812354	3928686
9.2	4156983	4566920	2570957	8767886	2793332	3962294	2475158	3228080	2943964	5852455	5653112	3230497	5156983	4566920	2570957	8767886	2793332	3962294
9.4	4243458	4611027	2630112	8732682	2762793	3979761	2496782	3233126	2963207	5853576	5673818	3242151	5243458	4611027	2630112	8732682	2762793	3979761
9.6	4245478	4354241	2675598	8778477	2798950	3971390	2482488	3216614	2976954	5856564	5648752	3245617	5245478	4354241	2675598	8778477	2798950	3971390
9.8	4229119	4586027	2572334	8536954	2771364	3920132	2489964	3228773	2966213	5821772	5667464	3241662	5229119	4586027	2572334	8536954	2771364	3920132
10	4213289	4244464	2595542	8750364	2774683	3906286	2463970	3250732	2965738	5818469	5650047	3250074	5213289	4244464	2595542	8750364	2774683	3906286
10.2	4238329	4710268	2659574	8651614	2776643	3908297	2485222	3230534	2931823	5824016	5669636	3247070	5238329	4710268	2659574	8651614	2776643	3908297
10.4	4221423	4023036	2663662	8588773	2778463	3914098	2475831	3257133	2941749	5847529	5649904	3248503	5221423	4023036	2663662	8588773	2778463	3914098
10.6	4333700	3856295	2633082	8717296	2772301	3933513	2477350	3241310	2951341	5805114	5686353	3216149	5333700	5052366	2633082	8717296	2772301	3933513
10.8	4244552	4048259	2825814	8538228	2757361	3908297	2478780	3231734	2952956	5817915	5686353	3217928	5244552	4048259	2825814	8538228	2757361	3908297
11	4192819	4474598	2671482	8750295	2786601	3880237	2485745	3224910	2973429	5851944	5724017	3220565	5192819	4474598	2671482	8750295	2786601	3880237
11.2	4218734	3984107	2825814	8638228	2814717	3908297	2506339	3245566	2999090	5849043	5731207	3250060	5218734	3984107	2825814	8638228	2814717	3908297
11.4	4261854	4319509	2752090	8905273	2824163	3923552	2483967	3245238	2965380	5831588	5698453	3216985	5261854	4319509	2752090	8905273	2824163	3923552
11.6	4224886	4162857	2635234	8881909	2819510	3947905	2489394	3251756	2965255	5819874	5715768	3249550	5224886	4162857	2635234	8881909	2819510	3947905
11.8	4272017	4173750	2667281	8606477	2817343	3900000	2493709	3230549	2933054	5850745	5702613	3238633	5272017	4173750	2667281	8606477	2817343	3900000
12	4288666	4436027	2771418	8834545	2803673	3900788	2461961	3256313	2979212	5790324	5661659	3249674	5288666	4436027	2771418	8834545	2803673	3900788
12.2	4189216	4565848	2770014	8746954	2790006	3968225	2485213	3248084	2978952	5785847	5697308	3225358	5189216	4565848	2770014	8746954	2790006	3968225
12.4	4269799	4282455	2685639	8562955	2794955	3967847	2462194	3252639	2954063	5848808	5669636	3249598	5269799	5517411	2685639	8562955	2794955	3967847
12.6	4228412	4273616	2787589	8681318	2778219	3908297	2473954	3234358	2976742	5810140	5649904	3237122	5228412	5163080	2787589	8681318	2778219	3908297
12.8	4215576	4538304	2694661	8883455	2788295	3995230	2466158	3240066	2941906	5788762	5686353	3232153	5215576	6631071	2694661	8883455	2788295	3995230
13	4245569	4318705	2647303	8534250	2793696	3919676	2463435	3265907	2970135	5805724	5686353	3252869	5245569	4957679	2647303	8534250	2793696	3919676
13.2	4204232	3522188	2867338	8671432	2723572	3950679	2465945	3247169	2990308	5787126	5706013	3214608	5204232	5969866	2867338	8671432	2723572	3950679
13.4	4283458	4475223	2758435	8827455	2714213	3980237	2466620	3261704	2993024	5790344	5659470	3241028	5283458	4924464	2758435	8827455	2714213	3980237
13.6	4248864	4185446	2745220	8638228	2724308	3914098	2484432	3246956	2974624	5793607	5666685	3248503	5248864	5982188	2745220	9353159	3224308	3914098
13.8	4224144	4242277	2818232	8905273	2612054	3762792	2482541	3244225	2960076	5797963	5664025	3251240	5224144	5515491	2818232	9237386	3112054	4028195
14	4279707	3938929	2795465	8881909	2764571	3807586	2478577	3265477	2997738	5792068	5677650	3262483	5279707	5549688	2795465	9567091	3064571	4096710
14.2	4252535	4073125	2729797	8605750	2799290	3723593	2481912	3260495	2972380	5788582	5673741	3253187	5252535	5403661	2729797	9560000	2999290	4195822
14.4	4287483	3677366	2845346	8767886	2808041	3740428	2476685	3228385	2986532	5785189	5694272	3237682	5287483	5448750	2845346	9590227	3008041	4301867
14.6	4283200	3371161	2840175	8732682	2806387	3828853	2481090	3216336	2964848	5798275	5673429	3237703	5283200	5249554	2840175	9656841	3006387	4323761
14.8	4259586	3331116	2729113	8778477	2791416	3980237	2486148	3248398	2984612	5800593	5692442	3236593	5259586	4808527	2729113	9963113	2991416	4331024
15	4217761	3562009	2651908	8638228	2750121	3914098	2473283	3257385	2975215	5795962	5694331	3241007	5217761	5562009	2866184	9882818	2950121	4428686
15.2	4214079	4795045	2601824	8905273	2717444	3762792	2454925	3261924	2942470	5774391	5699814	3225317	5214079	4795045	2873347	9716772	2954742	4362294
15.4	4236170	3856295	2605982	8900795	2681632	3807586	2482385	3247465	3001728	5788931	5694022	3238973	5236170	6012812	2819909	9745613	2978290	4379761
15.6	4227595	3909643	2648365	8494727	2672766	3685929	2489151	3242116	2990282	5814028	5715768	3222332	5227595	5435134	2848365	9780318	2959453	4471390
15.8	4292153	3888616	2648092	8605750	2665974	3731750	2481649	3247400	2987412	5776968	5702613	3322831	5292153	5390804	2848092	9677523	2939340	4420132
16	4255649	4530446	2662383	8638228	2649300	3880237	2505836	3275908	2975043	5774700	5661659	3242183	5255649	5032946	2862383	9429864	2911291	4406286
16.2	4214667	4701518	2662823	8536954	2629762	3908297	2488782	3235601	2972311	5808229	5697308	3239016	5214667	5373482	2862823	9656841	2899372	4495878
16.4	4257412	4640804	2648365	8778477	2627179	3923552	2495603	3252810	2986912	5797799	5662111	3245263	5257412	4919509	2848365	9596023	2914966	4351191
16.6	4236575	4734643	2748092	9534773	2768033	3947905	2501484	3258326	2980252	5786594	5650047	3234788	5236575	5087232	2848092	9534773	2915360	4333513
16.8	4246439	4763750	2666184	8605750	2772749	3908297	2492465	3245428	3013744	5741514	5669636	3247426	5246439	4390938	2866184	9056182	2883503	4396399
17	4286016	4256652	2648365	9347886	2812354	3923761	2505166	3249545	2981402	5773763	5649904	3224302	5286016	4174911	2848365	9347886	2921530	4349659
17.2	4287098	4755446	2748092	9244727	2793332	3997130	2502559	3257563	2999870	5779115	5686353	3257008	5287098	4222812	2848092	9244727	2893907	4313186
17.4	4199568	4373214	2666184	9000409	2762793	3914098	2491517	3242713	2977399	5766473	5699814	3249825	5199568	5045982	2866184	9000409	2894347	4323552
17.6	4256132	4653705	2666184	8728500	2798950	3962792	2490116	3293340	2989086	5769055	5694022	3237122	5256132	5220000	2866184	8728500	2880530	4347905
17.8	4288900	4494375	2616611	9019454	2612054	3907586	2486876	3287765	2988503	5746228	5715768	3232153	5288900	5048393	2916611	9019454	2867701	4200000
18	4235073	4618438	2648365	8830977	2764571	3976246	2487583	3241636	2982814	5754739	5702613	3244221	5235073	5136964	2848365	8830977	2863342	4300788
18.2	4308787	4273616	2648092	8901863	2799290	3908297	2486406	3261714	2991553	5746166	5715768	3213359	5308787	4601339	2848092	8901863	2860845	4268225
18.4	4224327	4538304	2648365	8989500	2808041	3908297	2504497	3266463	2963114	5750042	5702613	3258483	5224327	5075446	2848365	8989500	2865504	4267847
18.6	4280828	4318705	2748092	8917182	2867980	3880237	2477707	3283409	3008137	5763281	5661659	3249550	5280828	4029241	2848092	8917182	2867980	4260769
18.8	4308382	4722188	2673347	8942477	2859259	3908297	2481704	3293040	3004340	5772116	5697308	3223887	5308382	4722188	2873347	8942477	2859259	4195230
19	4259406	3954821	2780839	8668250	2686033	3914098	2486040	3289801	2979292	5764893	5662111	3247773	5259406	3954821	2880839	8668250	2686033	4219676
19.2	4272872	4703661	2662823	8900795	2677104	3955417	2472809	3267935	2989266	5771423	5650047	3211849	5272872	4703661	2862823	8900795	2677104	4150679
19.4	4255330	4678750	2666184	8649296	2650690	3923761	2500546	3265392	2993958	5791875	5669636	3272802	5255330	4678750	2866184	8649296	2650690	4188227
19.6	4233407	4662054	2648365	8611386	2678248	3997130	2472197	3273456	2983221	5769529	5649904	3238973	5233407	4662054	2848365	8611386	2678248	4166353
19.8	4216146	4895759	2648092	8752955	2664300	3914098	2504947	3273777	2989741	5740803	5655581	3225358	5216146	4895759	2848092	8752955	2664300	4146267
20	4275235	4409062	2666184	8797114	2644733	3962792	2485914	3258745	2987750	5758154	5689599	3249598	5275235	4409062	2866184	8797114	2644733	4163121
20.2	4236214	4096696	2780105	8805750	2717444	3907586	2495170	3268119	3006917	5815464	5655837	3237122	5536214	4096696	2980105	8805750	2717444	4159629
20.4	4217264	4001027	2663180	8836818	2681632	3976246	2515703	3271493	2981649	5791743	5649904	3232153	5417264	4001027	3163180	8836818	2681632	4123265
20.6	4212999	4124955	2608043	8572841	2672766	3908297	2517482	3264553	2964993	5785987	5686353	3244221	5412999	4124955	3108043	8572841	2672766	4240633
20.8	4201121	4284330	2662551	8771477	2665974	3923552	2510233	3251592	3002902	5755000	5724017	3267935	5401121	4284330	2962551	8771477	2665974	4114451
21	4251736	4387411	2743718	8610341	2649300	3947905	2486142	3253000	2963546	5751158	5681016	3265392	5401736	4387411	3043718	8610341	2649300	4103232
21.2	4268672	4282455	2755255	8893523	2629762	3908297	2486242	3251349	2985704	5774868	5692570	3273456	5368672	4282455	3055255	8893523	2629762	4142099
21.4	4272485	4792679	2609120	8554023	2627179	3923761	2473504	3248279	3007269	5746195	5675388	3273777	5372485	4792679	3009120	8554023	2627179	4075816
21.6	4285150	4807188	2654703	8780977	2636324	3931024	2486087	3268119	2972099	5724328	5651516	3237122	5385150	4807188	3054703	8780977	2636324	4094266
21.8	4275901	4679732	2626212	8664773	2614570	3880237	2491501	3244532	2952733	5721544	5677691	3232153	5375901	4679732	3126212	8664773	2614570	4134865
22	4268013	4261652	2686143	8604909	2629832	3977847	2487022	3261305	2980644	5736329	5655581	3252869	5368013	4863527	2886143	8604909	2629832	3977847
22.2	4214667	3973839	2733445	8387455	2623530	3947905	2486049	3241856	2963695	5742069	5689599	3214608	5414667	4449955	3033445	8387455	2623530	4023267
22.4	4271733	4387143	2665381	8487409	2663571	3908297	2513658	3269690	2976042	5734177	5655837	3241028	5371733	4815268	3065381	8487409	2663571	4017044
22.6	4210624	4099732	2603599	8499705	2631884	3923761	2476416	3273788	2973308	5746917	5648752	3248503	5310624	3990312	3003599	8499705	2631884	4026852
22.8	4282133	4490848	2634598	8634114	2617224	3900788	2496462	3247659	2998271	5745195	5702613	3251240	5382133	4164955	3034598	8634114	2617224	4063325
23	4211716	3844554	2799804	8611909	2630200	3968225	2464386	3248760	3006917	5744875	5715768	3262483	5311716	3844554	3099804	8611909	2630200	4045760
23.2	4294363	4707723	2669091	8644272	2613634	3967847	2474895	3241856	2985704	5740858	5702613	3253187	5294363	4707723	2969091	8644272	2613634	4012252
23.4	4265336	4705402	2683927	8659932	2604861	3975251	2486049	3269331	2976708	5744222	5661659	3237682	5265336	4705402	2983927	8659932	2604861	3975251
23.6	4282612	4816741	2690678	8478137	2623003	3976246	2503903	3262441	2971501	5717958	5697308	3237703	5282612	4816741	3090678	8478137	2623003	4042906
23.8	4265365	4538170	2616107	8563614	2610214	3908297	2490661	3233646	2996500	5748986	5662111	3224652	5265365	4538170	3016107	8563614	2610214	3972215
24	4349409	4424420	2700077	8693250	2640352	3980649	2487501	3271493	2990221	5740804	5650047	3229209	5349409	4424420	3100077	8693250	2640352	3980649
24.2	4417264	4182143	2634933	8678977	2682826	3914289	2495170	3233822	2975084	5725430	5648752	3249471	5417264	4182143	3134933	8678977	2682826	3914289
24.4	4412999	4033080	2675555	8746136	2639886	3953251	2499731	3261572	2945385	5732911	5667464	3243696	5412999	4033080	3075555	8746136	2639886	3953251
24.6	4401121	4761696	2654962	8795546	2636133	3895832	2479777	3270287	2960309	5717315	5650047	3244639	5401121	4761696	2954962	8795546	2636133	3895832
24.8	4279402	4468348	2679022	8481250	2587404	3908297	2478470	3267562	2958157	5716647	5669636	3287427	5279402	4468348	3179022	8481250	2587404	3908297
25	4305765	4777902	2741656	8662955	2607845	3976246	2478950	3265526	3006924	5719106	5649904	3236628	5305765	4777902	2941656	8662955	2607845	3976246
25.2	4293410	4556339	2789937	8556023	2612043	3880237	2496819	3254976	2972686	5723283	5686353	3248395	5293410	4556339	3089937	8556023	2612043	3880237
25.4	4234088	3967768	2741782	8646636	2596435	3977583	2482274	3237602	2974945	5747573	5686353	3239987	5234088	3967768	3141782	8646636	2596435	3977583
25.6	4281192	4506205	2604242	8534227	2629905	3850148	2480730	3270154	2966660	5753992	5724017	3229377	5281192	4506205	3104242	8534227	2629905	3850148
25.8	4218220	3979241	2605744	8532432	2618511	3774268	2474743	3252402	2968235	5786571	5731207	3231090	5318220	3979241	3005744	8532432	2618511	3774268
26	4270745	4712188	2611062	8733204	2610167	3740858	2459845	3267409	2966542	5740921	5702613	3222003	5300745	4712188	3111062	8733204	2610167	3740858
26.2	4249399	4672366	2603452	8504636	2604503	3795301	2477361	3252902	2967482	5776119	5661659	3252377	5349399	4672366	3003452	8504636	2604503	3795301
26.4	4207321	4687366	2614109	8519705	2597037	3748432	2504387	3293908	2970714	5740710	5697308	3230497	5307321	4687366	3014109	8519705	2597037	3748432
26.6	4244120	4602188	2688575	8580068	2586546	3795062	2496004	3266194	2988730	5743495	5662111	3242151	5344120	4602188	3188575	8580068	2586546	3795062
26.8	4282112	4557098	2615653	8581818	2620187	3797130	2482422	3275614	2957915	5757471	5650047	3245617	5282112	4557098	3115653	8581818	2620187	3797130
27	4223428	4402902	2722271	8655455	2611868	3772007	2468281	3256987	2944678	5730042	5669636	3241662	5323428	4402902	3022271	8655455	2611868	3772007
27.2	4246350	4200045	2636890	8525773	2610457	3762792	2491113	3247548	2968835	5747046	5649904	3250074	5346350	4200045	3036890	8525773	2610457	3762792
27.4	4201736	3806696	2675639	8583182	2601236	3807586	2478572	3224652	2942886	5769812	5655581	3247070	5401736	3806696	3075639	8583182	2601236	3807586
27.6	4268672	4315536	2755241	8525068	2594585	3723593	2474827	3229209	2978755	5742542	5689599	3236628	5368672	4315536	2955241	8525068	2594585	3723593
27.8	4272485	4694955	2634472	8385728	2584282	3740428	2485381	3249471	2976962	5752089	5689599	3248395	5372485	4694955	3034472	8385728	2584282	3740428
28	4205924	4564732	2699972	8383977	2595540	3828853	2475226	3243696	2955633	5752495	5655837	3239987	5305924	4564732	3199972	8383977	2595540	3828853
28.2	4274999	4868616	2710258	8399068	2578943	3763633	2482301	3244639	2942470	5772303	5649904	3229377	5374999	4868616	3110258	8399068	2578943	3763633
28.4	4260015	4424464	2782753	8494727	2581254	3704787	2465705	3287427	2960585	5717494	5686353	3226450	5360015	4424464	2982753	8494727	2581254	3704787
28.6	4232689	5006161	2637917	8869977	2598680	3782210	2497628	3236628	2958437	5733740	5724017	3259100	5332689	5006161	3037917	8869977	2598680	3782210
28.8	4211763	4196741	2640741	8976636	2596632	3753626	2502777	3248395	2945746	5731080	5681016	3250012	5311763	4196741	3040741	8976636	2596632	3753626
29	4245359	4801339	2685702	8954045	2581151	3685929	2489310	3254460	2951604	5719845	5662111	3221215	5345359	4801339	2985702	8954045	2581151	3685929
29.2	4206655	3889955	2665639	8900795	2572642	3731750	2472855	3236693	2953963	5724288	5650047	3235215	5306655	3889955	3065639	9121182	2572642	3731750
29.4	4207566	4623348	2676150	8815477	2593792	3719303	2500547	3232181	2949924	5743362	5669636	3211779	5307566	4623348	3076150	9222704	2593792	3719303
29.6	4201257	3878393	2627023	8832568	2584797	3693183	2484007	3260935	2938218	5758087	5649904	3273788	5301257	3878393	3027023	9108727	2584797	3693183
29.8	4268013	4261652	2616247	8838432	2562870	3727971	2490243	3251240	2940754	5697063	5655581	3247659	5368013	4261652	3016247	9208295	2562870	3727971
30	4256732	3973839	2639797	8616659	2571552	3704471	2468793	3262483	2945362	5737157	5689599	3248760	5356732	3973839	3139797	9106523	2571552	3704471
30.2	4285150	4387143	2698400	8747159	2577764	3709293	2483801	3253187	2916622	5715565	5655837	3229377	5385150	4387143	2998400	8935364	2577764	3709293
30.4	4275901	4099732	2675493	8583182	2572394	3722055	2499716	3254747	2964654	5704624	5649904	3231090	5375901	4099732	2975493	9065341	2572394	3722055
30.6	4200438	4490848	2693662	8525068	2583067	3687219	2479670	3251499	2955841	5735179	5694272	3222003	5300438	4490848	3093662	9097682	2583067	3687219
30.8	4271952	4200491	2758903	8773932	2568839	3667602	2476371	3267510	2955585	5723785	5673429	3235119	5271952	4200491	2958903	8773932	2568839	3667602
31	4208279	4018304	2711523	8944796	2571876	3713292	2489640	3260644	2960181	5727088	5692442	3223011	5308279	4018304	3011523	8944796	2571876	3713292
31.2	4285117	4282679	2722579	8605750	2561790	3660260	2490847	3252377	2958249	5727414	5694331	3216149	5285117	4282679	3122579	9092545	2561790	3660260
31.4	4214667	3750670	2639287	8519136	2563889	3621974	2490972	3230497	2962242	5718941	5699814	3217928	5414667	3750670	2939287	9469409	2563889	3621974
31.6	4271733	4677812	2661279	8766364	2569475	3685484	2521808	3242151	2960760	5735281	5694022	3236628	5371733	4677812	2961279	9004727	2569475	3685484
31.8	4238979	4169955	2679930	8816159	2561512	3642310	2503644	3245617	2964767	5749312	5715768	3248395	5338979	4169955	3079930	9259773	2561512	3642310
32	4204727	4603795	2699008	8499841	2552631	3659284	2531738	3241662	2940851	5703752	5662111	3254460	5404727	4603795	2999008	9326909	2552631	3659284
32.2	4245664	4114911	2671083	8605750	2559467	3662343	2534094	3250074	2961703	5707249	5650047	3236693	5345664	4114911	2871083	9464886	2559467	3662343
32.4	4252156	4554955	2700873	8478137	2576678	3598617	2484877	3247070	2945092	5713803	5648752	3232181	5352156	4554955	3100873	9062159	2576678	3598617
32.6	4299728	3826562	2616282	8563614	2568553	3602600	2502323	3245263	2964831	5725789	5667464	3223011	5299728	3826562	2916282	9169591	2568553	3602600
32.8	4242064	4443616	2673347	8605750	2567731	3596680	2516639	3234788	2950494	5724923	5650047	3216149	5242064	4443616	2873347	9340728	2567731	3596680
33	4265096	3890982	2744053	8499841	2564943	3576886	2533141	3247426	2966276	5679375	5655581	3217928	5265096	3890982	3044053	9302864	2564943	3576886
33.2	4228311	4213929	2664507	8605750	2566157	3628786	2520108	3224302	2965207	5726075	5689599	3239016	5328311	4213929	2864507	9445045	2566157	3628786
33.4	4253035	3763884	2675094	8385728	2580306	3977481	2491498	3257008	2959168	5701432	5655837	3243517	5253035	3763884	2875094	9345977	2580306	3564321
33.6	4225078	4132902	2680035	8383977	2577405	3944078	2516146	3249825	2931606	5711216	5649904	3216985	5425078	4132902	2980035	9438228	2577405	3543535
33.8	4241937	3999152	2637903	8399068	2567037	3931170	2521868	3272256	2966927	5721920	5686353	3252869	5341937	3999152	2937903	9237250	2567037	3612854
34	4237678	4089732	2697883	8494727	2580329	3880237	2499802	3242032	2977603	5711508	5724017	3265526	5337678	4089732	2797883	9090159	2580329	3603786
34.2	4260225	4411786	2753711	8499841	2536801	3908297	2508123	3252065	2960891	5702390	5669636	3254976	5360225	4411786	3053711	9397909	2536801	3544674
34.4	4248015	4012188	2674927	8605750	2526357	3704471	2514844	3246922	2957404	5740804	5649904	3237602	5248015	4012188	2974927	9224478	2526357	3566170
34.6	4234043	4810580	2641286	8752955	2565630	3709293	2494997	3276951	2952845	5705793	5686353	3270154	5334043	4810580	2841286	9349045	2565630	3541010
34.8	4290837	3849152	2723850	8797114	2540032	3722055	2502414	3262421	2967226	5715066	5686353	3252402	5290837	3849152	2923850	9300386	2540032	3556471
35	4296247	4363795	2666660	8805750	2559361	3687219	2519791	3254302	2959813	5681016	5706013	3267409	5296247	4363795	2966660	9433000	2559361	3571103
35.2	4272183	3439866	2662823	8836818	2566690	3667602	2530726	3215163	2945762	5692570	5659470	3251592	5272183	3439866	2862823	9288932	2566690	3586796
35.4	4259879	4613973	2611614	8605750	2535612	3713292	2480583	3268915	2956785	5653112	5666685	3253000	5359879	4613973	2911614	9444659	2535612	3513177
35.6	4270163	3522188	2734752	8487409	2560968	3660260	2509516	3262591	2959883	5673818	5664025	3251349	5270163	3522188	2934752	9317568	2560968	3672037
35.9	4238423	4475223	2700489	8499705	2560974	3555398	2501582	3234368	2972127	5687064	5677650	3248279	5338423	4475223	2900489	9499545	2560974	3555398
36	4293052	4185446	2660287	8634114	2525338	3502938	2538421	3220269	2972484	5719490	5673741	3268119	5293052	4185446	2760287	9496500	2525338	3502938
36.2	4250426	4242277	2714878	8611909	2558393	3639799	2520608	3236983	2973742	5713771	5686353	3271493	5350426	4242277	2914878	9443022	2558393	3639799
36.4	4281896	3938929	2679315	8644272	2533375	3574446	2535289	3249667	2969788	5686353	5724017	3264553	5281896	3938929	2779315	9331432	2533375	3574446
36.6	4297231	4073125	2695031	8659932	2544425	3562442	2527053	3245893	2990322	5724017	5669636	3251592	5297231	4073125	2795031	9175864	2544425	3562442
36.8	4229896	3677366	2648365	8478137	2537815	3678475	2482977	3228756	2968493	5731207	5649904	3253000	5329896	3677366	2848365	9302864	2537815	3678475
37	4259885	3371161	2748092	8563614	2544490	3519922	2507368	3249548	2937389	5698453	5686353	3251349	5359885	3371161	2848092	9388204	2544490	3519922
37.2	4206971	3331116	2637428	8693250	2540832	3557537	2496727	3252170	2954716	5715768	5686353	3257008	5306971	3331116	2737428	9277864	2540832	3557537
37.4	4208992	3486027	2674088	8678977	2536321	3595730	2498887	3248852	2941906	5702613	5724017	3249825	5308992	3486027	2874088	9355546	2536321	3595730
37.6	4239107	4232545	2614381	8836818	2542325	3480575	2499977	3219149	2966484	5661659	5731207	3249667	5339107	4232545	2814381	9412045	2542325	3480575
37.8	4275853	3975312	2632592	8605750	2527942	3549648	2499208	3256528	2998745	5697308	5698453	3232181	5375853	3975312	2732592	9397886	2527942	3549648
38	4252724	4536205	2666184	8487409	2534419	3542303	2496633	3220220	2974814	5662111	5715768	3260935	5352724	4536205	2866184	9328137	2534419	3542303
38.2	4202289	3816116	2743676	8499705	2540629	3500431	2512451	3224779	2967512	5706013	5702613	3251240	5302289	3816116	2743676	9358818	2540629	3500431
38.4	4252831	4363705	2749161	8634114	2533609	3543814	2526507	3226450	2942975	5659470	5687064	3262483	5352831	4363705	2749161	9109023	2533609	3543814
38.6	4223798	3977589	2665101	8481250	2528295	3581151	2510540	3259100	2956103	5666685	5719490	3253187	5323798	3977589	2665101	9428228	2528295	3581151
39	4238205	4105714	2784256	8662955	2522117	3471323	2503373	3250012	2940704	5664025	5713771	3254747	5338205	4105714	2784256	9341636	2522117	3471323
39.2	4274253	3852143	2688952	8556023	2539679	3549430	2506237	3221215	2964114	5677650	5686353	3245365	5274253	3852143	2688952	9163727	2539679	3549430
39.4	4283786	4757679	2722054	8646636	2521569	3522319	2493305	3235215	2968899	5673741	5724017	3242183	5283786	4757679	2722054	9348523	2521569	3522319
39.6	4250562	4530446	2752222	8534227	2531894	3496603	2495542	3211779	2954529	5694272	5731207	3239016	5350562	4530446	2752222	9268795	2531894	3496603
39.8	4217492	4701518	2653194	8532432	2541876	3590816	2507446	3243063	2974767	5673429	5698453	3243517	5317492	4701518	2653194	9458705	2541876	3590816
40	4245457	4640804	2603291	8733204	2524073	3546024	2517345	3253603	2995643	5692442	5655581	3216985	5245457	4640804	2603291	9130522	2524073	3546024
40.2	4223165	3888616	2736925	8605750	2547681	3550753	2508444	3245365	2990743	5694331	5698453	3252869	5323165	4734643	2736925	9309478	2547681	3550753
40.4	4240053	4530446	2655926	8478137	2538522	3622393	2509419	3242183	2976039	5699814	5715768	3260935	5240053	4763750	2655926	9305023	2538522	3622393
40.6	4230284	4701518	2709120	8563614	2522354	3976246	2521902	3239016	2977406	5694022	5702613	3251240	5330284	4256652	2709120	9487636	2522354	3545183
40.8	4219929	4755446	2774850	8605750	2538179	3908297	2508661	3243517	2985762	5659821	5661659	3262483	5319929	4755446	2774850	9320341	2538179	3570637
41	4263709	4373214	2687750	8893523	2528614	3914289	2525431	3216985	2985071	5672871	5669636	3253187	5263709	4373214	2687750	9395318	2528614	3628985
41.2	4205197	4653705	2683648	8554023	2534924	3953251	2497029	3252869	2979334	5679216	5649904	3254747	5305197	4653705	2683648	9338864	2534924	3514808
41.4	4218249	4110000	2687973	8780977	2529061	3895832	2510245	3214608	2954238	5674973	5686353	3251499	5318249	4110000	2687973	9562750	2529061	3603376
41.6	4238997	4837321	2604983	8893523	2509875	3908297	2483481	3241028	2972042	5681441	5724017	3273777	5338997	4837321	2604983	9410841	2509875	3569310
41.8	4252062	3894330	2581405	8605750	2515197	3976246	2516239	3248503	2956071	5666835	5681016	3258745	5252062	3894330	2581405	9342432	2515197	3502386

## Sheet: Fig.3G and Fig.3H
21G11,LexAopGCaMP6.0m response to Air, 0.5% CO2, 1% CO2 and 2% CO2 while inhibiting 23C09VGlut with UASKir2.1
Time	Air										0.5%										0.01										0.02
0.2	1975501	4824849	3803466	5284961	3872814	2587803	3011816	1621384	2205892	4033374	2057281	4368112	4155096	5744584	3249073	4184877	2393027	1440379	3033053	2626484	1921717	4144527	4116083	5015742	3655873	2538842	3109009	1415912	2442240	3998454	1839148	4096182	4048390	5331963	2773071	4025291	2370675	1299606	3154428	2471464
0.4	1923483	4810175	3821128	5273418	3847213	2609338	2984759	1620326	2201360	4000539	2057241	4396172	4226838	5750791	3259643	4199876	2411836	1451844	3064754	2640745	1918844	4228085	4145242	5023259	3611642	2557867	3164003	1367143	2408933	3987069	1840473	4067138	4107618	5443177	2760462	4054855	2336970	1298919	3083276	2516065
0.6	1896202	4794428	3807460	5310106	3784098	2610472	3003141	1605410	2198384	4064229	2054254	4368112	4200788	5817753	3298638	4272038	2389631	1439861	3024390	2628726	1918132	4176207	4110494	5050051	3644729	2557579	3094917	1365308	2386036	4011664	1860823	3988579	4059296	5431494	2747194	4095434	2318439	1290835	3079561	2467990
0.8	1900595	4817136	3876228	5283522	3814766	2605939	3012127	1631618	2203281	4032781	2016489	4391306	4205369	5803582	3297650	4255968	2388580	1430621	3007986	2634160	1942069	4198844	4104525	5070683	3676973	2504028	3091159	1349553	2386832	3982401	1820715	3999785	3989878	5415121	2756261	4046101	2332563	1290149	3060576	2444950
1	1893408	4764167	3859778	5272481	3847040	2614453	3015042	1645026	2176729	4067617	2035391	4432836	4203685	5764390	3302733	4266230	2385305	1441525	3001760	2627628	1917906	4141310	4154566	5023259	3644766	2520851	3067054	1345619	2377532	3983972	1829785	3974694	4024588	5397070	2757842	4054608	2334476	1282351	3066456	2451501
1.2	1882136	4828119	3846179	5297964	3798386	2621541	2979290	1624721	2194204	4065671	2016389	4437058	4172128	5758179	3276915	4247954	2377907	1434722	2991202	2610785	1917383	4176655	4104528	5111027	3713228	2511763	3073692	1351762	2385016	3958606	1814211	3994355	4037574	5380825	2725602	4037745	2323272	1280332	3063846	2457112
1.4	1891944	4848567	3873185	5284961	3838687	2586006	2990896	1629021	2207252	4068712	2034987	4375506	4177054	5793845	3284900	4203296	2371297	1430808	2991100	2628564	1896098	4194003	4129836	5009436	3715646	2539011	3049568	1342942	2398813	3960960	1816296	4009797	4048540	5384540	2783237	4051180	2342271	1286192	3033072	2443988
1.6	1870732	4874451	3866469	5273418	3823016	2607129	3001347	1609175	2223135	4100347	2040238	4403828	4177083	5750861	3274150	4208866	2395137	1425697	3015343	2617785	1912006	4142552	4081156	5014695	3708935	2512038	3031479	1343389	2403078	3987527	1795643	3970863	4024756	5383218	2764579	4030344	2343538	1285993	3054133	2473226
1.8	1879490	4882052	3861380	5310106	3838687	2610941	3027672	1611022	2206717	4037938	2057241	4442948	4169667	5799894	3272121	4202410	2367391	1437181	3017944	2625321	1880633	4149144	4067078	5035605	3720963	2519801	3029420	1341116	2398752	3976697	1840473	3982842	4004917	5429538	2725677	4051458	2361710	1286325	3063622	2475672
2	1878372	4882895	3854217	5298081	3826338	2609227	3036153	1613867	2216555	4046032	2057281	4425062	4160336	5768021	3297721	4231898	2400083	1437581	2999978	2611025	1913434	4179277	4095119	5013736	3700212	2537581	3046173	1345996	2404846	3965390	1794545	3981482	4056916	5338156	2728173	4024806	2326411	1278619	3081809	2459731
2.2	1872583	4873322	3858853	5290272	3798817	2603030	3026719	1610224	2209794	4007831	2057241	4419232	4170639	5719661	3273292	4206819	2384848	1440379	3012997	2599224	1893484	4140633	4146863	4994746	3723022	2524931	3051335	1347560	2399741	3973537	1813920	3966863	4048342	5354654	2728331	4011683	2330253	1288349	3088415	2446984
2.4	1868734	4838829	3878283	5239901	3820826	2594235	3005597	1613095	2212684	4021149	2040182	4373043	4130519	5712805	3275721	4202438	2363972	1421330	2998277	2626694	1916802	4154117	4086576	5025977	3691542	2527239	3055299	1340016	2402622	3973013	1793401	3967287	4011224	5387162	2749148	4043390	2334251	1288756	3037108	2446685
2.6	1875608	4860722	3822053	5285155	3798790	2599997	3025580	1618629	2190417	4049393	2064079	4398712	4196659	5723273	3273135	4198896	2375606	1423934	3013669	2608836	1893139	4141067	4091019	4974345	3725954	2519471	3052860	1329731	2411664	3995159	1840473	3986791	4013244	5367075	2710419	4030833	2352177	1286062	3050736	2456629
2.8	1898733	4855981	3832262	5288397	3809510	2628980	3019880	1625202	2188152	4045967	2044304	4404048	4149194	5751855	3272896	4196916	2407267	1440213	3027054	2626638	1914568	4156176	4126345	5041714	3722480	2528987	3065225	1349887	2431310	4025480	1806305	3985518	4048390	5368299	2728074	4030370	2324858	1281906	3046829	2433916
3	1871783	4881733	3847672	5259926	3801526	2627335	3042684	1620326	2180518	4028961	2064079	4390489	4184473	5756218	3263270	4216688	2349005	1432057	3038438	2640157	1885062	4148895	4066244	4993699	3694789	2515848	3078734	1351812	2436560	3983687	1828952	3962679	4038139	5324331	2736585	4024196	2337647	1279983	3096976	2445896
3.2	1873663	4814182	3832454	5290129	3798417	2610367	3017055	1619414	2167646	4091572	2067800	4386218	4172623	5747388	3239727	4212400	2403168	1431980	3022627	2624776	1924537	4159795	4110001	5020404	3769931	2523988	3064160	1343093	2402885	3977245	1823076	3933153	4023182	5363692	2694525	4022291	2336537	1274928	3090252	2466362
3.4	1874959	4875901	3823124	5269271	3814596	2616749	3033344	1607520	2186987	4061911	2042227	4396605	4142889	5744584	3274108	4186347	2394749	1421819	3045179	2618307	1895255	4160857	4122865	4983094	3746596	2538842	3074009	1349207	2412971	4008450	1795256	3963136	3973942	5331963	2712592	4036236	2348877	1279183	3093111	2478760
3.6	1864077	4885734	3796390	5275484	3798790	2627222	3011571	1623372	2213013	4048912	2058529	4399553	4164642	5711700	3283060	4246084	2364411	1432701	3033897	2613151	1921717	4114579	4122318	4961113	3732159	2546556	3075282	1339222	2411009	3986453	1839148	3957259	3996678	5353223	2791710	4034278	2347818	1280582	3093057	2448592
3.8	1875859	4879289	3827726	5283522	3847040	2613365	2985548	1609570	2204541	4043166	2051426	4389362	4189125	5739520	3293846	4214056	2387126	1443494	3037610	2628726	1891030	4133852	4099890	5012644	3750872	2522856	3065752	1341525	2417295	3970911	1818823	3999767	4031493	5331102	2783237	4006297	2357221	1286182	3065845	2456544
4	1877130	4878842	3842592	5280235	3838616	2598962	3001275	1621384	2190416	4051467	2040420	4407139	4152919	5687324	3266271	4235339	2377556	1426512	3027126	2621120	1899045	4147567	4102078	4965975	3694789	2529986	3078185	1337333	2423988	3990437	1815372	3994572	4002710	5342940	2772689	4083188	2340698	1288502	3062943	2454656
4.2	1870818	4858342	3807460	5259926	3784098	2612059	3010709	1624427	2213047	4043455	2034679	4413628	4159647	5728654	3267434	4196609	2395431	1422941	3060385	2602509	1896438	4116637	4097187	5015742	3788225	2540223	3093116	1347071	2412714	3973832	1818228	3982519	4056260	5310280	2760905	4011972	2356241	1276092	3082577	2462218
4.4	1881111	4867639	3870059	5310106	3847040	2624227	3022350	1618130	2203597	4025760	2049616	4431355	4170833	5695756	3276915	4198900	2387265	1434976	3033053	2601617	1914561	4151296	4057725	4992905	3787718	2517621	3083515	1337677	2422698	3976484	1800921	3963821	4020215	5402912	2777506	4024242	2327822	1297134	3111218	2447308
4.6	1870576	4839937	3845279	5298081	3838687	2587803	3011816	1605410	2207432	4070327	2050665	4406120	4128988	5684121	3279126	4211874	2376279	1457097	3016142	2616203	1897429	4091778	4071714	5026967	3765013	2515668	3081301	1325498	2417550	3994205	1828796	3983907	4014915	5365056	2773071	4059134	2355884	1291673	3088686	2434296
4.8	1850840	4841874	3819345	5290272	3820826	2609391	2972994	1622607	2214233	4008124	2048555	4411984	4155096	5714530	3267292	4227127	2389146	1432130	3007637	2612596	1922605	4144527	4070692	4965294	3718951	2528145	3073313	1340568	2421664	3989112	1803207	3964103	4022232	5408309	2783237	4040119	2362074	1299606	3097357	2472731
5	1858592	4828119	3811385	5254253	3814596	2603284	3016150	1635592	2211271	4050232	2043533	4369886	4168903	5703295	3249073	4224091	2392233	1443281	3028427	2593332	1893716	4159674	4091077	4939017	3763772	2549156	3075544	1346761	2422647	3987069	1802071	3959519	3998617	5374875	2791710	4018696	2349675	1289890	3088758	2468434
5.2	1883606	4841176	3845279	5315299	3809510	2590170	2997827	1645475	2198615	4064942	2056572	4410974	4137521	5747248	3259643	4192013	2369250	1432946	3030308	2608611	1923056	4133039	4116083	4984596	3724193	2544748	3067598	1343962	2409212	3971731	1811018	3960356	4005005	5385835	2786856	4024957	2347381	1293342	3078056	2444222
5.4	1875330	4861472	3790943	5331346	3838616	2612112	2988288	1623044	2231850	4029727	2041662	4376658	4163831	5715843	3269712	4189488	2378647	1429446	3040383	2612710	1898735	4134411	4091367	4932104	3721844	2530442	3096889	1354196	2422560	3988665	1809292	3978224	4039785	5351812	2777506	4034492	2350909	1287931	3099690	2443580
5.6	1879376	4858416	3821644	5316671	3798790	2594733	2989189	1614740	2212433	4032438	2035632	4412431	4120428	5714457	3290204	4192753	2393756	1429531	3030251	2637578	1921053	4109990	4038639	4964081	3735609	2535815	3039995	1363224	2396502	3965244	1818451	3985778	4036023	5355142	2783237	4044976	2350643	1293149	3078947	2444386
5.8	1874251	4828871	3807518	5312189	3838616	2599115	3016863	1614713	2199986	4028888	2064079	4405244	4127402	5740864	3303188	4232233	2380231	1429930	3007186	2634038	1890705	4136232	4070114	4937001	3754572	2526305	3055904	1351014	2401778	3986978	1798298	3969785	4016216	5325120	2791710	4086937	2332107	1298097	3090244	2457032
6	1887518	4847842	3840367	5335771	3784098	2609338	2991660	1603216	2198136	4054236	2061302	4431278	4166970	5699772	3307077	4218908	2389344	1432340	3030893	2640745	1920865	4173266	4082602	4966208	3735696	2531058	3072490	1353940	2426962	4004052	1805538	3944139	4029062	5317547	2837619	4016797	2366302	1290336	3102189	2445512
6.2	1879077	4851611	3806177	5302949	3798790	2625429	3017756	1628953	2206081	4028833	2086093	4407177	4127926	5711722	3259401	4197085	2394802	1437092	3020825	2622577	1924164	4146748	4093255	4990810	3733599	2548447	3064626	1364929	2418637	4016616	1804747	3951119	4047347	5366639	2777506	4025038	2339604	1296598	3119703	2460443
6.4	1895257	4840086	3819075	5324802	3798386	2634974	3026253	1611208	2195179	4044216	2076340	4386784	4151634	5670993	3270182	4228687	2425619	1445042	3022193	2648154	1908871	4142608	4113594	4970723	3712330	2533224	3067901	1361633	2387748	4018289	1813403	3953706	4012059	5308275	2811153	4035568	2354761	1290888	3092219	2446099
6.6	1864024	4837909	3824628	5297500	3820826	2628631	3008577	1624426	2212226	3994999	2096236	4386838	4132348	5703241	3289468	4209893	2425819	1438876	3022928	2614959	1883532	4136100	4083624	4971721	3744114	2547757	3078514	1375237	2394987	3990324	1812324	3970264	4034255	5339693	2817535	4004194	2359188	1292073	3124338	2470674
6.8	1878016	4872563	3827070	5284924	3809510	2611305	2997903	1619751	2178197	3997938	2083301	4392784	4119859	5720157	3284337	4234019	2402933	1425677	3030758	2626484	1897610	4130361	4059877	4980452	3751988	2538559	3081749	1372792	2411473	3951172	1818389	3972005	4047918	5350038	2814265	4034323	2370687	1298795	3098315	2471464
7	1874534	4850002	3817787	5338339	3814766	2626121	3004835	1629187	2194680	4005753	2076261	4400181	4129291	5720359	3309924	4217047	2378035	1431237	3008735	2580973	1905172	4123113	4099581	4991411	3719154	2533065	3079441	1372759	2402053	3971835	1823747	3974097	4013096	5369879	2822539	4053961	2356925	1297408	3110410	2465232
7.2	1864229	4852294	3803466	5284961	3806516	2615710	2999113	1617977	2201205	4057549	2057241	4436011	4117150	5715527	3294644	4205069	2401624	1440518	3007129	2615923	1908434	4147906	4051750	4983217	3751462	2530159	3053524	1361868	2399598	3966991	1803349	3959927	3997521	5363608	2783237	4030542	2343550	1301033	3107004	2473876
7.4	1866374	4865507	3825433	5273418	3806516	2633189	2984759	1611611	2220979	4051032	2080501	4391306	4132841	5699153	3282055	4213009	2410493	1443394	2997999	2627565	1897072	4143201	4076226	4991642	3742744	2526226	3062718	1370430	2416136	3979496	1812047	3935993	4023255	5341452	2786856	4054855	2375399	1303788	3115777	2459433
7.6	1862215	4848567	3809958	5310106	3838687	2619287	3039214	1596105	2212435	4077752	2074870	4426207	4152625	5745309	3269727	4203561	2387287	1450400	3020567	2599817	1917801	4140401	4124749	4966287	3710471	2546261	3081370	1387651	2410264	3977014	1817672	3949397	3976309	5354031	2814541	4031705	2371448	1295744	3073048	2462772
7.8	1871017	4874676	3798411	5283522	3798386	2630975	3019750	1611237	2229987	4073058	2078177	4396172	4131486	5720296	3286801	4188417	2386127	1448119	3033472	2626160	1917640	4137944	4060963	4980142	3694221	2536094	3093572	1364284	2400248	3976883	1797869	3953410	3993390	5361566	2819472	4015001	2377474	1307874	3069646	2487168
8	1880433	4850808	3803158	5289497	3801526	2609295	2976907	1601496	2205892	4040557	2077578	4401291	4150037	5735041	3296137	4235021	2406350	1452729	3027061	2619864	1901397	4129468	4081197	4976472	3713228	2530429	3065959	1373246	2414599	3989918	1800918	3962511	3977271	5332001	2824292	4027958	2353610	1307268	3120354	2463096
8.2	1865232	4853729	3833974	5297411	3798417	2630527	3014096	1592213	2200927	4081768	2042665	4374675	4132672	5685814	3284220	4222618	2363337	1452801	3025566	2614984	1903979	4145057	4045777	4967440	3715646	2551782	3071965	1378554	2423835	3996256	1809807	3944941	3986763	5401931	2831193	4040946	2365707	1314838	3150378	2459473
8.4	1858954	4882263	3837809	5253318	3814766	2641541	3015790	1592677	2211556	4091741	2057281	4358734	4172503	5643881	3260972	4199519	2406131	1441801	3012086	2635414	1891716	4153023	4097026	4991199	3708935	2531823	3091717	1388912	2412268	3982830	1792922	3954236	4018094	5382049	2816758	4061285	2369876	1299555	3119778	2468998
8.6	1879405	4835435	3796541	5298081	3814596	2623864	2988628	1598204	2211404	4066401	2076309	4430354	4113734	5687203	3301031	4221485	2366758	1452232	3026451	2634214	1909773	4183068	4064116	4981008	3720963	2532047	3120039	1383486	2397779	3966054	1792639	3962077	4026574	5374796	2834051	4035091	2363915	1302953	3130841	2439521
8.8	1883287	4834607	3806913	5290272	3884160	2601800	3001694	1613541	2210914	4092404	2070012	4391814	4146262	5745688	3275448	4228472	2384573	1446233	3019009	2609765	1894586	4103643	4079940	4966136	3700212	2529007	3106517	1404019	2416084	3998454	1803340	3977778	4034791	5327211	2783237	4023493	2363287	1305247	3140429	2462485
9	1881425	4861284	3837349	5239901	3873079	2617413	2999659	1606187	2190768	4075510	2064079	4406585	4125853	5754812	3301004	4233314	2387997	1460636	3037625	2595072	1913837	4106678	4062357	4934129	3723022	2524115	3109009	1394613	2426401	3990346	1789535	3949741	4020023	5387799	2797400	4054798	2349893	1306824	3113452	2451600
9.2	1871399	4826444	3801667	5272481	3854170	2621297	2979824	1609568	2218814	4080052	2067800	4368928	4094216	5746101	3304165	4201568	2385946	1458232	3031377	2615022	1894088	4116855	4091770	4960993	3691542	2507654	3083228	1394594	2436135	3960712	1808652	3932585	4067223	5345541	2801626	4020956	2348722	1316547	3089250	2468067
9.4	1889817	4837676	3793986	5284961	3863215	2597784	3036345	1598685	2206733	4072395	2051972	4380501	4085225	5648009	3271449	4184877	2398699	1462710	3014410	2603412	1920781	4135374	4071262	4963483	3711819	2507635	3073071	1396408	2421977	3963337	1805976	3933787	4026134	5362732	2807126	4040036	2374550	1321919	3092449	2485787
9.6	1871481	4824849	3791017	5280235	3820826	2621105	3006728	1600267	2213217	4082176	2039378	4371872	4127154	5750791	3291325	4208148	2385999	1460115	3028820	2645030	1909115	4110124	4077619	4965508	3690299	2520421	3104033	1392998	2396166	3997199	1793631	3939002	3979316	5299678	2777506	4038291	2366335	1308994	3089513	2489960
9.8	1881668	4868876	3821128	5272421	3806516	2625511	2986259	1612630	2218018	4094880	2079666	4377461	4138175	5700090	3256855	4210446	2390715	1446914	3034069	2629957	1894304	4106575	4069888	4984375	3723509	2529484	3089790	1397666	2416385	3989834	1798125	3965816	4041311	5297007	2817707	4032574	2370237	1311572	3085208	2468282
10	1887168	4863559	3779742	5269715	3847213	2618873	2988195	1610238	2225238	4046302	2044304	4368112	4139395	5644818	3259661	4216339	2404885	1451898	3039348	2640807	1918844	4139959	4092438	4992605	3694789	2549795	3073314	1399672	2411658	3989303	1798796	4002372	4028454	5309070	2781110	4042739	2369653	1313839	3128789	2466075
10.2	1887518	4824849	3847672	5249692	3847040	2609338	2984759	1614554	2201360	4033374	2042665	4373043	4155096	5703295	3276915	4199876	2393027	1440379	3033053	2628726	1914561	4144527	4116083	5023259	3712330	2538842	3083515	1390021	2422470	3987069	1840473	3977778	4048390	5331963	2783237	4054855	2449311	1322817	3093111	2471464
10.4	1875859	4766127	3840329	5278755	3838687	2618926	2997903	1573009	2205385	4000539	2041300	4367186	4170068	5699772	3335376	4231796	2379774	1451615	3069350	2644865	1918844	4188274	4161129	4991642	3694221	2571658	3113314	1407305	2405518	4014572	1831504	3966863	4109604	5308275	2773071	4025038	2371651	1276307	3136178	2498039
10.6	1872583	4851480	3819399	5236058	3784098	2600051	2970287	1605410	2198131	4083192	2080691	4427063	4112481	5735041	3268734	4195951	2339790	1427209	3028344	2623835	1919699	4144280	4136286	4992905	3667945	2521856	3081569	1395596	2413920	4030105	1826257	3986230	4036475	5366639	2794571	4059610	2337261	1278779	3085080	2475910
10.8	1879405	4842020	3820213	5272522	3838616	2572205	2974630	1620326	2186604	4032106	2085512	4367801	4135697	5770395	3271488	4163389	2360315	1417900	3010069	2619886	1899008	4126879	4110761	4966208	3644643	2527964	3067077	1384115	2391673	3975740	1838538	3956037	4023904	5423843	2798959	4054996	2338372	1266846	3071847	2455276
11	1886972	4801082	3820786	5322968	3820826	2571410	2969245	1619414	2156438	4045456	2046393	4378383	4114201	5763132	3249410	4197388	2325194	1423655	3008263	2575204	1916797	4097335	4099506	4984596	3627003	2515763	3071570	1392317	2360960	3954851	1796375	3963904	4013133	5472902	2807708	4027935	2356804	1271283	3059462	2442896
11.2	1884767	4801451	3820318	5341661	3823618	2581528	2983487	1607520	2185285	4056749	2078934	4396015	4109617	5731351	3257042	4198717	2368123	1414963	3015564	2587613	1917801	4113200	4079294	5080795	3661229	2510412	3060740	1385785	2377245	3981664	1804530	3989389	4015785	5432277	2789977	4011566	2342839	1260794	3055101	2431774
11.4	1864335	4807339	3820035	5326714	3837444	2581470	2944719	1623372	2179554	4065266	2042227	4356532	4137433	5696284	3273199	4164771	2369790	1426837	3017560	2588139	1927599	4128541	4106185	5044410	3655678	2502130	3058161	1381328	2379541	3984548	1829189	3954476	4044107	5372458	2786856	3986381	2338541	1272170	3109412	2451466
11.6	1879498	4793220	3801392	5292344	3831130	2576991	2951814	1611237	2206574	4062055	2058529	4378888	4145316	5724559	3250207	4169064	2352499	1430528	3002961	2568945	1922605	4104141	4070907	5080302	3670706	2514802	3047040	1392021	2396051	3976162	1819702	3988661	4006324	5380232	2780930	4002530	2335812	1272550	3100616	2440706
11.8	1887624	4812198	3781341	5305529	3802283	2581624	2979857	1601496	2193641	4030152	2051426	4339174	4151353	5653336	3247278	4178188	2369048	1420126	3026152	2576508	1917801	4102883	4113624	5049866	3640707	2498749	3015406	1385351	2374161	3957754	1790884	3909899	4043313	5371895	2768885	4039370	2347411	1276752	3101067	2423108
12	1876288	4803713	3793450	5306123	3847040	2573161	2986317	1611208	2188625	4045417	2040420	4365229	4121115	5670557	3253486	4200179	2364945	1422790	3027769	2610972	1922605	4084329	4101278	5041132	3688874	2504926	3034695	1365065	2386789	3994834	1801178	3906321	4006165	5396511	2782936	4044922	2346526	1259127	3071007	2435459
12.2	1863417	4811460	3806795	5316354	3831290	2591379	2960038	1624426	2188358	4019058	2034679	4373850	4130205	5642529	3214849	4162446	2356082	1422706	3022445	2599009	1923056	4094330	4095128	5000588	3638231	2526725	3046342	1379168	2394556	3993809	1803431	3943255	4034541	5398870	2773217	4016187	2340952	1273597	3083114	2458862
12.4	1857332	4757605	3771828	5285155	3795012	2577886	2981945	1618629	2205224	4038121	2049616	4384143	4116395	5610688	3207516	4180227	2358006	1409428	3016127	2562229	1924537	4072651	4072599	5047852	3659548	2530732	3055748	1375999	2381243	3925711	1811110	3950038	3975534	5427854	2791710	4021323	2333711	1280821	3097199	2447122
12.6	1868730	4810175	3813132	5288397	3798790	2568969	2954113	1625202	2203152	4027430	2050665	4336221	4114617	5633671	3229400	4154190	2365943	1419499	3026428	2570634	1895255	4093036	4124997	5044031	3655873	2523652	3038758	1367961	2395756	3969876	1798343	3965599	4039252	5420456	2783237	4036186	2344998	1270699	3104247	2452422
12.8	1871388	4788797	3807719	5259926	3809450	2581614	2989201	1624721	2207645	4043598	2048555	4365367	4129417	5633041	3223449	4150945	2359733	1422012	3037409	2584632	1921717	4086472	4128481	5056252	3611642	2526916	3031234	1375019	2378125	3959679	1806988	3951021	3988972	5440103	2772689	4007660	2318706	1285092	3083277	2462476
13	1855541	4771653	3820404	5242830	3801526	2576986	2961052	1629021	2206031	4056504	2054254	4355917	4137625	5696254	3204232	4161860	2357254	1407452	3029897	2596183	1917906	4119943	4041764	5018143	3644729	2484610	3031629	1372719	2406882	3980453	1807424	3954769	4012384	5380552	2760905	4043368	2330464	1276790	3076029	2451426
13.2	1868801	4776648	3759802	5262728	3813854	2591205	2939745	1609175	2212139	4044022	2066622	4378310	4087259	5651993	3211491	4143294	2351702	1425681	3037451	2604905	1917383	4084532	4094634	5019988	3676973	2495471	3064500	1379657	2402333	3971530	1792356	3948652	4017827	5348969	2777506	4032344	2347964	1266635	3083652	2445915
13.4	1833656	4784737	3813503	5240937	3823016	2607485	2970234	1611022	2215709	4058598	2076294	4378176	4095766	5624377	3214920	4157716	2353941	1431471	3044209	2587564	1896098	4124748	4104771	5027036	3644766	2495553	3059839	1383132	2391553	3960251	1797993	3955426	3997198	5343278	2773071	4013301	2365009	1263942	3093446	2443645
13.6	1874647	4777557	3793691	5270449	3838687	2575828	2976901	1613867	2211740	4047395	2040182	4385494	4100648	5672972	3219957	4174228	2364784	1425620	3023581	2619257	1930705	4102399	4065036	5034881	3681580	2500080	3070840	1378464	2404320	3984457	1804754	3948503	4003879	5360128	2774931	4023839	2357642	1265942	3100927	2449958
13.8	1856577	4765645	3829843	5236058	3826338	2594604	2980836	1610224	2175114	4059435	2069999	4331753	4145863	5626414	3231261	4154246	2345908	1408702	3016473	2611679	1902143	4082579	4076942	5043369	3625212	2511739	3076773	1377319	2400258	3975471	1797260	3951965	4033163	5371182	2759131	4034404	2356074	1271281	3108225	2471816
14	1858577	4782729	3798969	5299412	3798817	2589940	2975439	1613095	2208712	4036499	2051972	4374166	4144184	5631648	3210753	4160493	2375639	1413523	2995203	2584382	1889137	4074886	4057277	5021041	3651785	2525604	3062821	1381380	2422470	4000443	1796480	3948477	4029653	5360579	2757337	4041072	2358785	1287406	3102740	2452828
14.2	1886796	4791554	3789077	5234265	3778297	2566497	2988390	1618629	2212223	4033374	2046653	4337426	4174960	5632651	3225988	4178773	2357098	1430221	3037757	2604830	1903736	4116381	4054346	5071790	3633390	2521203	3047983	1379995	2414185	3957995	1794596	3945686	4033832	5384761	2767693	4080283	2361812	1266558	3095121	2453089
14.4	1888941	4775941	3778211	5285716	3814596	2595130	2960885	1625202	2215160	4000539	2043533	4322462	4132349	5660135	3213424	4168418	2359699	1408763	3030144	2577266	1880775	4091905	4115640	5043484	3623655	2513690	3067563	1382928	2386817	3944925	1818109	3940413	4004973	5356597	2755153	4042864	2351747	1275645	3091931	2443707
14.6	1873164	4781472	3772257	5315299	3826383	2608318	2977148	1620326	2188640	4021987	2056572	4337863	4135360	5653295	3214216	4199876	2333459	1415911	3016685	2570483	1893400	4093866	4084396	5038597	3627510	2529948	3045493	1384397	2377645	3947010	1789845	3948376	4010985	5364268	2778093	4042808	2348519	1284235	3086830	2456310
14.8	1868658	4807425	3815224	5269755	3807051	2609338	3002610	1631618	2211085	4027624	2041662	4346345	4130150	5690551	3226221	4138520	2368437	1423160	3003569	2584745	1905606	4055905	4123658	5058180	3643646	2536735	3053028	1374115	2407727	3963057	1824227	3967391	3992660	5334282	2744709	4029259	2376154	1272410	3113765	2440304
15	1865784	4794428	3788213	5247391	3799953	2596076	2971957	1645026	2192039	4058536	2035632	4325518	4137950	5660696	3228120	4199519	2353777	1415792	3021754	2598629	1907852	4089529	4085284	4965948	3620906	2546145	3054424	1390387	2388763	3968189	1807562	3933163	4066682	5354084	2758947	4044437	2389806	1277342	3104998	2435139
15.2	1867030	4817136	3801527	5232703	3801207	2603221	2976467	1624721	2189599	4028030	2004904	4356862	4111081	5633742	3219347	4161416	2368188	1421111	3015958	2602223	1862920	4095367	4086264	5013755	3643252	2504655	3068596	1390021	2412141	3977654	1792654	3940059	4012704	5376194	2760462	4056094	2354101	1284573	3119837	2438375
15.4	1861912	4764167	3812622	5254253	3814766	2594711	2973302	1629021	2211278	4068978	2041300	4329699	4154708	5640051	3209617	4180115	2363852	1416004	3047230	2593490	1911629	4082251	4103333	4999232	3627930	2518717	3058999	1385778	2390809	3970706	1805755	3962045	3979762	5336605	2747194	4048779	2340473	1278237	3124861	2463400
15.6	1875489	4766127	3779023	5269008	3806516	2583066	2998418	1617977	2186495	4073421	2042665	4340396	4077486	5634254	3194710	4157686	2358252	1432347	3027415	2598004	1871150	4089539	4103621	5033157	3631551	2522476	3062668	1391267	2401116	3941716	1798522	3977595	4007299	5359441	2756261	4023399	2336167	1294886	3108712	2448237
15.8	1865186	4786740	3775286	5248831	3809510	2588513	2998657	1623372	2205012	4080243	2046036	4350529	4123716	5630492	3172984	4182873	2379430	1423368	3012893	2607710	1893857	4086964	4094024	5025083	3625229	2544565	3054599	1376723	2396414	3949594	1808029	3932570	3999580	5363703	2757842	4051384	2374684	1291834	3112250	2472424
16	1854806	4750737	3803261	5186082	3792637	2571008	2990665	1609570	2191035	4042843	2038899	4354470	4133589	5644548	3199716	4170158	2345864	1435121	3017286	2601633	1876898	4070130	4084487	4967597	3648578	2527116	3074501	1383997	2416024	3972025	1810855	3955294	4043622	5358420	2725602	4053424	2344658	1292495	3097718	2471262
16.2	1879405	4824849	3847672	5273418	3838616	2609338	2997903	1621384	2208672	4033374	2058529	4406100	4155096	5748600	3259661	4194332	2383176	1458391	3033053	2628726	1917801	4146268	4116083	4984596	3699122	2538842	3083515	1383486	2408161	3987069	1840473	3966863	4048390	5450961	2777506	4094892	2389169	1314634	3093111	2471464
16.4	1887518	4816457	3831697	5316354	3798417	2584460	2996034	1624427	2212679	4000539	2056572	4339836	4173267	5694194	3234521	4147568	2374861	1448335	3041687	2644585	1919327	4078474	4125735	5044031	3650934	2563502	3064500	1401843	2407736	3953756	1835313	3936560	4041614	5393925	2764579	4022194	2361940	1302241	3115062	2473645
16.6	1884270	4797534	3845465	5285155	3777711	2544521	2967430	1609745	2182548	4015876	2069026	4366401	4145266	5682021	3202780	4136994	2382385	1433282	3030103	2603408	1889460	4085342	4133367	5043484	3618908	2527920	3089754	1397713	2398180	3975251	1807103	3913824	4022006	5322964	2725677	4049473	2349400	1290374	3132283	2468068
16.8	1858035	4751022	3798909	5288397	3798386	2550496	2965031	1603128	2179320	3985450	2044872	4351454	4106588	5701061	3212773	4144202	2367165	1425923	3010811	2614783	1894000	4110186	4080399	5041070	3618497	2563661	3079352	1387275	2410190	3980472	1811082	3939359	4057697	5406285	2728173	4045643	2355727	1299164	3091012	2450759
17	1877234	4763160	3802073	5305652	3788338	2535176	2956938	1604262	2183806	4008488	2038669	4345697	4108460	5660356	3194959	4141183	2363869	1447186	3049619	2603461	1901410	4119463	4094347	5030730	3621118	2538372	3089056	1394665	2379961	3995218	1807461	3917339	4051993	5338233	2728331	4037720	2356688	1290281	3121069	2477287
17.2	1867871	4728661	3782895	5290129	3793599	2537352	2982454	1613490	2176944	3986512	2059952	4359081	4144319	5644988	3185229	4122823	2374203	1430847	3050511	2605619	1886898	4119467	4138508	5064107	3594344	2523424	3072725	1385184	2405934	3969048	1815723	3929844	4023140	5314099	2749148	4036632	2350208	1296020	3081072	2468554
17.4	1874691	4719810	3767738	5269271	3775758	2539600	2974772	1615232	2185490	3979544	2030520	4351322	4115813	5700219	3187563	4132987	2385466	1431866	3043524	2593942	1867408	4083474	4114279	5025634	3598739	2505978	3106930	1398195	2409782	3952403	1800828	3934738	3976647	5332542	2710419	4040246	2351376	1296769	3108984	2442768
17.6	1868378	4737987	3784162	5275484	3801185	2544857	2966829	1624721	2183666	3989534	2026349	4346465	4123507	5662281	3183554	4139202	2373284	1430206	3029439	2592977	1879593	4089849	4111127	5028108	3622453	2524980	3098817	1377203	2401348	3946066	1801692	3950251	4033585	5329655	2728074	4044263	2337460	1291785	3100819	2444630
17.8	1845419	4725125	3811980	5285260	3784098	2527502	2950666	1629021	2184978	4005953	2045803	4338539	4140243	5650429	3200503	4151098	2383930	1431282	3064778	2568413	1890604	4092357	4063182	5017627	3601697	2541885	3076917	1389494	2421710	3964272	1803277	3943593	4062579	5341525	2736585	4014713	2341011	1298899	3112005	2437184
18	1863096	4739448	3779362	5272522	3784192	2545929	2973325	1609175	2191556	3972440	2023634	4358818	4138367	5637063	3185700	4154036	2366284	1427208	3039989	2585107	1865442	4122563	4109833	5037538	3584554	2537973	3066934	1395616	2418637	3971292	1812213	3922597	4030737	5386644	2694525	4022674	2341866	1287888	3106744	2460061
18.2	1875113	4736001	3801866	5249692	3771104	2549951	2984719	1583388	2197944	3971335	2040107	4369259	4146554	5668977	3163342	4158124	2376340	1434278	3018300	2627120	1883017	4114166	4114216	5005606	3575719	2541439	3055042	1406401	2403495	3959295	1807467	3954246	4035121	5358250	2712592	4027941	2343473	1293324	3094774	2458166
18.4	1862980	4751148	3811141	5278755	3743659	2579025	2980804	1587533	2193387	3994338	1995516	4352303	4134956	5649724	3184443	4134484	2393794	1442990	3029407	2606823	1885764	4096804	4101425	5016617	3593968	2544889	3054147	1403055	2381403	3961216	1823956	3898321	4018195	5344624	2732816	4018322	2364534	1287140	3112909	2468930
18.6	1864796	4686005	3772559	5246309	3788119	2566146	2948849	1591626	2181655	3985057	2035036	4332498	4136857	5647877	3208781	4137782	2380515	1450041	3057309	2579951	1882021	4096743	4099714	5048700	3620018	2509239	3046853	1402306	2393138	3948343	1803205	3928227	3990100	5318367	2717903	4041557	2330936	1297036	3137688	2470077
18.8	1878016	4704016	3755574	5282181	3765504	2551154	2960049	1589055	2179336	4034937	2013966	4343970	4131597	5676603	3171649	4104559	2371401	1438598	3071700	2605195	1871321	4099767	4093862	5023358	3587992	2514443	3059336	1406695	2405721	3980947	1795725	3943387	3983204	5357419	2714129	4042873	2335921	1301372	3100113	2452147
19	1854858	4727402	3779574	5237063	3753596	2542743	2983676	1592444	2191985	3995681	2023027	4332299	4120480	5709440	3180266	4126027	2379470	1441868	3034633	2592727	1871444	4114330	4092354	5008530	3586680	2513573	3070954	1398631	2410980	3972213	1818431	3960128	4002190	5383781	2724641	4017175	2347837	1294124	3131986	2466388
19.2	1874099	4734685	3784176	5228312	3767451	2543961	2940188	1587766	2181132	3998497	2014115	4332556	4146248	5671757	3189776	4198176	2360797	1451853	3036456	2600640	1883556	4096693	4061212	5052433	3563821	2531306	3055154	1399157	2405015	3947033	1813824	3954430	4037634	5388388	2722037	4062746	2342288	1307199	3132887	2452246
19.4	1861920	4712829	3759758	5208094	3765669	2546515	2943469	1600049	2197260	3988146	2043999	4300943	4126213	5682645	3151350	4151788	2390102	1441717	3029026	2606144	1887025	4087918	4074174	5009230	3601815	2514527	3081686	1406203	2419856	3927537	1821677	3957175	4012159	5372920	2709644	4029210	2350362	1313801	3100388	2467186
19.6	1870479	4721085	3807631	5193697	3756532	2545245	2973849	1594491	2179690	3992422	2001015	4343076	4147365	5707592	3198033	4137419	2375223	1450109	3034545	2622461	1876761	4094370	4084654	5025120	3593947	2508266	3098174	1389779	2424701	3960245	1813513	3957701	3987648	5375790	2727199	3999250	2339038	1303837	3089395	2465809
19.8	1861537	4712534	3764426	5221576	3757611	2572110	2936599	1603094	2197497	3981222	2027134	4328134	4131714	5693027	3168716	4089939	2350239	1456085	3050097	2603234	1869850	4124973	4122185	5005690	3602220	2529444	3095756	1392174	2402722	3940963	1805728	3954563	4000127	5354265	2709579	4014000	2344954	1313880	3103572	2483681
20	1861816	4743279	3751750	5194290	3722458	2552910	2977846	1596435	2195011	4010393	2023495	4367186	4126857	5670305	3161936	4129897	2367795	1441675	3020293	2620184	1849541	4118465	4057297	5056584	3629372	2519146	3072729	1388641	2410649	3957222	1789828	3939171	4028722	5366440	2713430	4035558	2358534	1300094	3114418	2467540
20.2	1853747	4685981	3752300	5207075	3768058	2547762	2999919	1592314	2197650	3991633	2027309	4308736	4141805	5675898	3196595	4104577	2379413	1433446	3047222	2600692	1884420	4097861	4065868	5030802	3588987	2525972	3086453	1394319	2414535	3927338	1779024	3952710	4019782	5324948	2710754	4012807	2329508	1299322	3121477	2445170
20.4	1863587	4743044	3800602	5172818	3733393	2562691	2972104	1600324	2194398	3947692	2012695	4336136	4143096	5640388	3194990	4095196	2357755	1460503	3029879	2606053	1876136	4093536	4073730	5026573	3589786	2554518	3075466	1403107	2406168	3949511	1809532	3927610	4028298	5323985	2707017	4035493	2343501	1300625	3120627	2448611
20.6	1873624	4725433	3782562	5211943	3785438	2553662	2986856	1597038	2202591	3976874	2017407	4357148	4128527	5742502	3200799	4111686	2375419	1452977	3036237	2616406	1887437	4100124	4098880	5042332	3587423	2527641	3083970	1395621	2407654	3955851	1808848	3949674	4048562	5349893	2695088	4038558	2339319	1306772	3119303	2457267
20.8	1864015	4743758	3761398	5171796	3764073	2550143	2964165	1598570	2207834	3986242	2023511	4354776	4099790	5689011	3182940	4133178	2382150	1446917	3012046	2588252	1893400	4071208	4114176	5011059	3592953	2505467	3088377	1396731	2377617	3926568	1811718	3937155	4034588	5341276	2708368	4017320	2350750	1293868	3098841	2465106
21	1865667	4680978	3780678	5177735	3761610	2544924	2968992	1599972	2203079	3989776	2022557	4331662	4153574	5647304	3223373	4150555	2334122	1440240	3055056	2602677	1905606	4071714	4081461	5046974	3600044	2514096	3093174	1400597	2415434	3932633	1801800	3952735	3984918	5350273	2694913	4025291	2312701	1318046	3126866	2472065
21.2	1878916	4766667	3770285	5198862	3744190	2534092	2978870	1597473	2202485	3993940	2240756	4495214	4524407	5809003	3758987	4154081	2357503	1473319	3113342	2661359	1907852	4095656	4074635	5007753	3576769	2530901	3089188	1397899	2391993	3963189	1789624	3919036	4011370	5348140	2696496	4013109	2314615	1316763	3103371	2448607
21.4	1875695	4691092	3765129	5225851	3760075	2552638	2965182	1621317	2174568	3952534	2209567	4940407	4525887	5997567	3769034	4212313	2375870	1497768	3149417	2704876	1862920	4100786	4085423	4995635	3596744	2523663	3083182	1380000	2413855	3937351	1805268	3914491	3993805	5368351	2714115	4035961	2340657	1308130	3088501	2466717
21.6	1884433	4726696	3765948	5206447	3751464	2546860	2939162	1612493	2193081	3973754	2198459	4888876	4416183	5983078	3591786	4394883	2445145	1499473	3198597	2800284	1911629	4131981	4108181	5053043	3588098	2531673	3064297	1387501	2416043	3965605	1802024	3942534	4016460	5313672	2705203	4014946	2319460	1304496	3118143	2456599
21.8	1858370	4721429	3777409	5219186	3723338	2574940	2953887	1609067	2197629	3957115	2195364	4304853	4408826	5840564	3488405	4397119	2449320	1512074	3276444	2849878	1895255	4101000	4085239	5001387	3568448	2524926	3069911	1400334	2412757	3958972	1797881	3948089	4030768	5363721	2715358	3990624	2352527	1291383	3117893	2484789
22	1852973	4707772	3796999	5212792	3734264	2554594	2942336	1603586	2190014	3979135	2124569	4293991	4302366	5656361	3286227	4272202	2505623	1523336	3255666	2723690	1893857	4082350	4085064	5043412	3576714	2510013	3074530	1401101	2402612	3926852	1822553	3947618	4054462	5351925	2699055	3968402	2332674	1297728	3113372	2462345
22.2	1858730	4726225	3753055	5169268	3743654	2555683	2977906	1602944	2197037	3977816	2096489	4332699	4220386	5687791	3175925	4106184	2536145	1524470	3204268	2610756	1882392	4098513	4083756	5010170	3616589	2520235	3079293	1423313	2413151	3944950	1805772	3918699	4030541	5310831	2724099	3967903	2330451	1298263	3111983	2476914
22.4	1862505	4720710	3771494	5141233	3741442	2566864	2956233	1605024	2199207	3964790	2008602	4326559	4245991	5709301	3213308	4101235	2565871	1517153	3032308	2597892	1975944	4067981	4104672	5044281	4193987	2612137	3076404	1443291	2390025	3917841	1817041	3935837	3986334	5421788	2704438	3981442	2341902	1298047	3126945	2459235
22.6	1878814	4748526	3767003	5209204	3759249	2559344	2979708	1591527	2210741	3975507	1998191	4321304	4193671	5719325	3186984	4098881	2567621	1507692	3021034	2596812	1992478	4078542	4092836	5068678	4156950	2651282	3079702	1442235	2386122	4293536	1815621	3939083	4016007	5390080	2692182	3970576	2328982	1313329	3110850	2457583
22.8	1856377	4693226	3829644	5193082	3772413	2548457	2984635	1605710	2189666	3979747	1983512	4314507	4113922	5661197	3193857	4112857	2532374	1510016	3035321	2586961	2123352	4083161	4061969	5093816	4166126	2661516	3050628	1435371	2393359	4298495	1793336	3934810	3991574	5370884	2710089	3984370	2325537	1298190	3111504	2450576
23	1882400	4713153	3800128	5179968	3753843	2558895	2973706	1592119	2178623	3962555	2013061	4342274	4131885	5706285	3179575	4090128	2438970	1489431	3023054	2602056	2204763	4114674	4603637	5183347	4199458	2655184	3086023	1439220	2416490	4284109	1850748	3944633	3975934	5425790	2704033	4009713	2350955	1293355	3129984	2456880
23.2	1869270	4743696	3786584	5165685	3778539	2540894	2946671	1601940	2201984	3991668	2019015	4331207	4108937	5677778	3177084	4089463	2390062	1506185	3014961	2597660	2241635	4123890	4664435	5241826	4145369	2646822	3076098	1435792	2418146	4115724	2033800	3945168	4826168	5508789	2711509	4039517	2377466	1314281	3127484	2479469
23.4	1874416	4714322	3805633	5140225	3748021	2553168	2974108	1610945	2183083	3987609	2007021	4310281	4152862	5662360	3179160	4110718	2389902	1487143	3015941	2590352	2254294	4216196	4691154	5268317	4053772	2660625	3080433	1438903	2423559	4182780	2170708	4001291	4816102	5504540	2722699	4043698	2465883	1303284	3120945	2502506
23.6	1852904	4697036	3761435	5154249	3719999	2557192	2976447	1611567	2201360	4001816	2017010	4309720	4125015	5665798	3170536	4119792	2380515	1477749	3035438	2592656	2236798	4477033	4668676	5221643	3941806	2675443	3088682	1450519	2445456	4104301	2184311	4526346	4836239	5665085	2739555	4072447	2523195	1297579	3159032	2487344
23.8	1872793	4696570	3778512	5192026	3747816	2563803	2939661	1601018	2200384	3968295	2007467	4309377	4156278	5654902	3210838	4121981	2371401	1459225	3054669	2599994	2220587	4530793	4559326	5122382	3996012	2691035	3081624	1459605	2519872	4138774	2161542	5255829	4756900	5613692	2741769	4322632	2621301	1315202	3139590	2507019
24	1846134	4736909	3759745	5142029	3739541	2555554	2979760	1609745	2202480	4002932	2016331	4327087	4165910	5727717	3208924	4151916	2379470	1448119	3049619	2583331	2197294	4727634	4438774	5081746	3594233	2692782	3040629	1476441	2569129	4120744	2181340	5508381	4831576	5613996	2808439	4307230	2635981	1310426	3158769	2528649
24.2	1875032	4730762	3753134	5141723	3727398	2566659	2970081	1603128	2208394	3985968	2026581	4299219	4207959	5674180	3180266	4157300	2360797	1452729	3066665	2595825	2129677	4882659	4420132	5095139	3590755	2669753	3080435	1468224	2615174	4128960	2184444	5489031	4754690	5634946	2924165	4396386	2631945	1335946	3170036	2525186
24.4	1876459	4698160	3760687	5104203	3714813	2554145	2973427	1604262	2189462	3981895	2029091	4343549	4155096	5729910	3185229	4199519	2390102	1452801	3034545	2591771	1930705	4771216	4235068	5083914	3601081	2681211	3088280	1469294	2713517	4127359	2189205	5461874	4712235	5649380	2982392	4389707	2646336	1348619	3134110	2501003
24.6	1883512	4716867	3754174	5137731	3741356	2554200	2955369	1613490	2203806	3976791	2033231	4351003	4114983	5769402	3180266	4103343	2375223	1441801	3044590	2602765	1884087	4683688	4137124	5048700	3586425	2686562	3163912	1465226	2823448	4100017	2185783	5506747	4763453	5690421	3028019	4396786	2693520	1329568	3132341	2539729
24.8	1875267	4683884	3762488	5172438	3728683	2564518	2937094	1615232	2184172	3982264	2022478	4312000	4107366	5672972	3261140	4089493	2378483	1452232	3049701	2612658	1882392	4504281	4140907	5023358	3578088	2697464	3274581	1479936	2862093	4104537	2184494	5499685	4854716	5687498	3012184	4335605	2742392	1344967	3176745	2562982
25	1866315	4716192	3722058	5154875	3746112	2566514	2960264	1612429	2197376	3974917	2039488	4347853	4131556	5682021	3201447	4083659	2377031	1446233	3059190	2592005	1896515	4129051	4137131	5008530	3593275	2673071	3777728	1464679	2834242	4087866	2193871	5460446	4670454	5642385	2958772	4350026	2773857	1371422	3210770	2567005
25.2	1874442	4685962	3773380	5174038	3720309	2562388	2968432	1618159	2198383	3952451	2028030	4316897	4118242	5674298	3163716	4159827	2393027	1460636	3083085	2603932	1888689	4090300	4116631	5042332	3604846	2657383	3788136	1458599	2772903	4016483	2180347	5479479	4538807	5682021	2982750	4355900	2812046	1362870	3929787	2543628
25.4	1874544	4692576	3760479	5151428	3732875	2569502	2980568	1629301	2188074	3956562	2037554	4354794	4117674	5714147	3148745	4136701	2379939	1458232	3044419	2572381	1879483	4081566	4158082	5033932	3586920	2622887	3701912	1462617	2681017	4023602	2183083	5457191	4596139	5665906	2915633	4307695	2736923	1387703	3934516	2537933
25.6	1872862	4713780	3756208	5146230	3709734	2558291	2954770	1611844	2199349	3977430	2053190	4297155	4113778	5673938	3146590	4094456	2371121	1451853	3038449	2582440	1902669	4090668	4131759	5064107	3608038	2531306	3384473	1453454	2630228	4001317	2189637	5452991	4564160	5615447	2896087	4337584	2787152	1381845	3870848	2571400
25.8	1868224	4702490	3763804	5163319	3732524	2573197	2979192	1633568	2188858	3951514	2036297	4310729	4102597	5718237	3176979	4090200	2383345	1441717	3045703	2596877	1863319	4110451	4132818	5008530	3602406	2541885	3293074	1454743	2587470	3977856	2195165	5484111	4381514	5665709	2876999	4329419	2835861	1370880	3958318	2580134
26	1870780	4716881	3769110	5130369	3712371	2555289	2937372	1613244	2178773	3946719	2031257	4323058	4091986	5710662	3163626	4125684	2353654	1441717	3017768	2596533	1891981	4125845	4090770	5029009	3563575	2527641	3266462	1454780	2559774	3989025	2187824	5418785	4121739	5684034	2894357	4303879	2939254	1368254	3839763	2602051
26.2	1859210	4688282	3752229	5137160	3719936	2573356	2930949	1630292	2183372	3966208	2018700	4291210	4126049	5689439	3157443	4107255	2350784	1450109	3023789	2583074	1884299	4061487	4067215	5023513	3541432	2513690	3272757	1460557	2579147	3976039	2176903	5345552	4101405	5592557	2869386	4226302	2952875	1371370	3823151	2596870
26.4	1883674	4732744	3768937	5188687	3726121	2555393	3001142	1614987	2179540	3968539	2021668	4297808	4125867	5697860	3155399	4084658	2371554	1456085	3016000	2593016	1885606	4081638	4064096	5031112	3595273	2511539	3288351	1450497	2562188	3984109	2185706	4689836	4143661	5540145	2868645	4295639	2761537	1374061	3822459	2611050
26.6	1867066	4734790	3762062	5109706	3714442	2554351	2970652	1609303	2169397	3972302	2008902	4341655	4092009	5708405	3174673	4088495	2394391	1458232	3050293	2592937	1891919	4109837	4110141	5015870	3572645	2504655	3273820	1443504	2542856	4015724	2188395	4099980	4132763	5500955	2872367	4183477	2675409	1365022	3989357	2610153
26.8	1873565	4685421	3756634	5139091	3716624	2531830	2965648	1621006	2190075	3964562	2006203	4283822	4111849	5683309	3164365	4068687	2376683	1468506	3038863	2599765	1864637	4072072	4067603	5033932	3568658	2507654	3227858	1432549	2560138	3982780	2115946	3911678	4053633	5444103	2883607	4003723	2643109	1369646	3640675	2599866
27	1872325	4708797	3758714	5123626	3700113	2561320	2957788	1619881	2175755	3945751	2051719	4289291	4113743	5674298	3148566	4099623	2349842	1459332	3026815	2580077	1866196	4064414	4073815	4977615	3550627	2509733	3174648	1443903	2529156	4004301	2026185	3902706	4092915	5379280	2843076	4054524	2578770	1361989	3571624	2611664
27.2	1888677	4745864	3786554	5135821	3721874	2556503	2947740	1613704	2201003	3953306	2050890	4305776	4079150	5724756	3169351	4065106	2349941	1441178	3038383	2593618	1889251	4135347	4092834	4964849	3553457	2538426	3162330	1392657	2487789	4038774	1818034	3929777	4109181	5319047	2834016	4050831	2549430	1363001	3666091	2639740
27.4	1872011	4728773	3733802	5118665	3693181	2537926	2958536	1613764	2196071	3980385	2002306	4284086	4100210	5709249	3142337	4094271	2368577	1442363	3007161	2599994	1875384	4095841	4061138	4985648	3579868	2493373	3164803	1410250	2445390	4020744	1811143	3910243	4067825	5351925	2817223	4070338	2476232	1367608	3541757	2621562
27.6	1881959	4678359	3799310	5150273	3705999	2548524	2970642	1617016	2198792	3937886	2040238	4265562	4117182	5687296	3159716	4068647	2341304	1439977	3021333	2600933	1872063	4089767	4068312	5013571	3582157	2535857	3165127	1416970	2455492	4028960	1803553	3938424	4062934	5310831	2795763	4090469	2490654	1379574	3520047	2630888
27.8	1874936	4706980	3747988	5134899	3689593	2555834	2976511	1613000	2193260	3944715	2011640	4296055	4106071	5671496	3154931	4117445	2377699	1449059	3051566	2584204	1889196	4064580	4062183	4954065	3563821	2528433	3094580	1409991	2450480	4027359	1801736	3912036	4073774	5406285	2806323	4052879	2483210	1363908	3312368	2607307
28	1869428	4702533	3768418	5122359	3693367	2523020	2957587	1630997	2192734	3941368	2021928	4309377	4055394	5724873	3151177	4077343	2371069	1438173	3052484	2581785	1885619	4112985	4054914	4949130	3601815	2504562	3106705	1404959	2438316	4000017	1809668	3940277	4090340	5338233	2795375	4058332	2466727	1369533	3344734	2578924
28.2	1871298	4710646	3756811	5089313	3710035	2573256	2954279	1632747	2172424	3944283	2035391	4310732	4109078	5665826	3152415	4108334	2378483	1437250	3066665	2616209	1879760	4098357	4107988	5066888	3593947	2496372	3093317	1412585	2404646	4004537	1817487	3940482	4086134	5368774	2791579	4053424	2470357	1348924	3497025	2562555
28.4	1869026	4716143	3772673	5130842	3687047	2553043	2953094	1639424	2198703	3945048	2016389	4311831	4092567	5676743	3151277	4084919	2352753	1445018	3026011	2613829	1888892	4088145	4101863	4980258	3601081	2506995	3078905	1403401	2424039	3987866	1781416	3943876	4092278	5386426	2814855	4015049	2443972	1369040	3217688	2579490
28.6	1870129	4681022	3757500	5065433	3692872	2555974	2991769	1622522	2209135	3972311	2034987	4296573	4129455	5652742	3148871	4059513	2365091	1438245	3029416	2595825	1881436	4107138	4095670	4985868	3590755	2489220	3068780	1412909	2405906	4016483	1816176	3937755	4063050	5319047	2815439	4044654	2444435	1343664	3235752	2564658
28.8	1879785	4719185	3748743	5079573	3693195	2544764	2975410	1628913	2203507	3961183	2024360	4287889	4093075	5717515	3159388	4088389	2373131	1450986	3005645	2602765	1882166	4116218	4120256	4997391	3564381	2511539	3068811	1392657	2393743	4023602	1808693	3933539	4077785	5344471	2807355	4053635	2416343	1335860	3206279	2552612
29	1859973	4699820	3777859	5104100	3690451	2551248	2987446	1627720	2187730	3949342	2008516	4328907	4104531	5659484	3141490	4089493	2390341	1445030	3045896	2609976	1874060	4115806	4067591	5004769	3576404	2508944	3072503	1410250	2396919	4001317	1806922	3928358	4062451	5319047	2774150	4052988	2403652	1321066	3206973	2565462
29.2	1882074	4707276	3774009	5135742	3694889	2541215	2958178	1630456	2197923	3952172	2012794	4284104	4117169	5690845	3167724	4074425	2392973	1445192	3031825	2572298	1904559	4112639	4062352	4983366	3556050	2513717	3064510	1409877	2394959	3977856	1817190	3926454	3997871	5379880	2748584	4064648	2408128	1314760	3210149	2551819
29.4	1867888	4734936	3772964	5098412	3680942	2576603	2959669	1627512	2191674	3969969	2029146	4293459	4133720	5698338	3133147	4103343	2387995	1432492	3056882	2591771	1897551	4131240	4058293	4982163	3561851	2515078	3059815	1410952	2402977	3989025	1807587	3901359	4038723	5444103	2725342	4064965	2412209	1315447	3195851	2545352
29.6	1868416	4701076	3756261	5142457	3686575	2530626	2984036	1628212	2208417	3945499	2022946	4327087	4087544	5715586	3150580	4077973	2377031	1434724	3058759	2603262	1887684	4090676	4079844	4951519	3573561	2508732	3066639	1413783	2371969	3976039	1784893	3904320	4035583	5405917	2683627	4047222	2402021	1316799	3202766	2552225
29.8	1868896	4686132	3756292	5083205	3707754	2528851	2975433	1632948	2238033	3948269	2009190	4277022	4104321	5686172	3181709	4084143	2386423	1415985	3036104	2583331	1909671	4085341	4122095	5005086	3541512	2505599	3073010	1415763	2413438	3950918	1805274	3919743	4041199	5386707	2686230	4048243	2396923	1311062	3174046	2579327
30	1870603	4678096	3788421	5118487	3669819	2552788	2996891	1630619	2200202	3942276	2009654	4323102	4114882	5708844	3169978	4086032	2380307	1434122	3061292	2581396	1881564	4091350	4067798	4948803	3566916	2509733	3088736	1401282	2405685	3946745	1789787	3927079	4038623	5316373	2681122	4031966	2405967	1312009	3150434	2565780
30.2	1872537	4686129	3755567	5062436	3697155	2545826	2977993	1641665	2204188	3922614	1992513	4266924	4065312	5711656	3145530	4076419	2363463	1425280	3022797	2608488	1899737	4099535	4062993	4935013	3552163	2531987	3050445	1410432	2409895	3982756	1790322	3915223	4009329	5379836	2669841	4072216	2377432	1315980	3190804	2564512
30.4	1857139	4700008	3823867	5109906	3671860	2554369	2970759	1639542	2199410	3975292	2007572	4300562	4132791	5684100	3161998	4077139	2370722	1429296	3019221	2600947	1876964	4100312	4057307	5009346	3582031	2536318	3094253	1406727	2411946	3944687	1797727	3908165	3984016	5408860	2676974	4066302	2384243	1308506	3162526	2530143
30.6	1863208	4692826	3746544	5063817	3685367	2531803	2962306	1644369	2159789	3931191	2028033	4273519	4110147	5684359	3145992	4067847	2382251	1435449	3031239	2611329	1874330	4077874	4087114	4932252	3584879	2523511	3065805	1416617	2421597	3951786	1809546	3928729	3951424	5337147	2669905	4081349	2397107	1302164	3193199	2527724
30.8	1884179	4707282	3761973	5094061	3672715	2552102	2959715	1636291	2174625	3945900	2016817	4301724	4131689	5707481	3173750	4063176	2385129	1436332	3039901	2606874	1866821	4096574	4080090	4975683	3585078	2517219	3079958	1415089	2381462	3953374	1790072	3907625	3964455	5331414	2667891	4078157	2400507	1312606	3158785	2537811
31	1868557	4710274	3762423	5148226	3663571	2564627	2983293	1646557	2200066	3948605	2006694	4290286	4090764	5705355	3152781	4092517	2388410	1437592	3051133	2608073	1882990	4107834	4089565	5011262	3566865	2503972	3088023	1401211	2394515	3958774	1804019	3941004	4015797	5318300	2682056	4080573	2414436	1307451	3182785	2528407
31.2	1859651	4651435	3768454	5099397	3670345	2543651	2953479	1660610	2188898	3896399	2020125	4298111	4133896	5691600	3160946	4083659	2368699	1424100	3035552	2614388	1890330	4102065	4080463	4974125	3544218	2523796	3110178	1403002	2386724	3942217	1792619	3899767	3967346	5352773	2653347	4044054	2386226	1325392	3188709	2510098
31.4	1872324	4684413	3779296	5130690	3671170	2551922	2958517	1664779	2187966	3915925	2031489	4285846	4091498	5703529	3160654	4037308	2371621	1437501	3044257	2599582	1893345	4079237	4100259	4975301	3545539	2504391	3084415	1412084	2430627	3955229	1782928	3927440	4029938	5339244	2658454	4036281	2388885	1317294	3199037	2502769
31.6	1868797	4702387	3774612	5093690	3639130	2537954	2957250	1657359	2170749	3902321	1996341	4272219	4112537	5708203	3140810	4049205	2380859	1425580	3029073	2601811	1881691	4093893	4093039	4962685	3575941	2518919	3087303	1409877	2405096	3938827	1781738	3913215	4001096	5368303	2654567	4062289	2374029	1300573	3214961	2515242
31.8	1884794	4691884	3744392	5062613	3668772	2543502	2968920	1650117	2186648	3943748	2002341	4309042	4103545	5663208	3154895	4048050	2376973	1417808	3011237	2597084	1894994	4082925	4044876	4922207	3541090	2495498	3084924	1406390	2414085	3934589	1796752	3954862	3991527	5355096	2660405	4054686	2403777	1301568	3176524	2502689
32	1890616	4690023	3810480	5091233	3716322	2541763	2947110	1632518	2165195	3926852	1986488	4263695	4117773	5664154	3150098	4044510	2380542	1421705	3059190	2588648	1896465	4088096	4033301	4990798	3550630	2508554	3060921	1423399	2416275	3926461	1773851	3911862	3986879	5346614	2646729	4012220	2396587	1313867	3193544	2495717
32.2	1894355	4718017	3779927	5057175	3695677	2551214	2975675	1655815	2200337	3929485	2006351	4353310	4085891	5670575	3132601	4061267	2374089	1430732	3043099	2599319	1880699	4077772	4094996	4974181	3515181	2524191	3068717	1412757	2424057	3925727	1800172	3900409	3972054	5379280	2639078	3997581	2360112	1305933	3164133	2467704
32.4	1871680	4694609	3789956	5128422	3675208	2546591	2971524	1640102	2191828	3939301	2010406	4292628	4104822	5673441	3139902	4044211	2382988	1437801	3042098	2601586	1889468	4075809	4097542	4956269	3545911	2521995	3074602	1408666	2400482	3881105	1787173	3942994	3952865	5319047	2651108	4045569	2370278	1318146	3183842	2458167
32.6	1866056	4675019	3788326	5123279	3689818	2541158	2976692	1644765	2191157	3937828	2017701	4299219	4076357	5685449	3178841	4058088	2396590	1426365	3066958	2598519	1880880	4063141	4104825	4899435	3563342	2526984	3082107	1399739	2400405	3887978	1803228	3947249	3941221	5379880	2629588	4047567	2339442	1306786	3143093	2479184
32.8	1881686	4684483	3791339	5086934	3677380	2536270	2964756	1656315	2182782	3956556	1984078	4295052	4127587	5697180	3150580	4032866	2368480	1430482	3026682	2586126	1895744	4061299	4034598	4930477	3524485	2506893	3074424	1404575	2418910	3889365	1800324	3938620	3967932	5304243	2678459	4024493	2323989	1305386	3165766	2449638
33	1848053	4729449	3781202	5112521	3675435	2555365	2952704	1644719	2206792	3947198	2027503	4299645	4098769	5703559	3140196	4056284	2382036	1422664	3048297	2601586	1878308	4053799	4132611	4933955	3539076	2520235	3064239	1409181	2400683	3896722	1816332	3930856	3961246	5379445	2637664	4028703	2345001	1312136	3139074	2464637
33.2	1878374	4699461	3793014	5112265	3684838	2534723	2949077	1664489	2195276	3967420	2011757	4300750	4130330	5723956	3148667	4039771	2366184	1433579	3026851	2583043	1869627	4072194	4113668	4940663	3536615	2502176	3069785	1407750	2422442	3902710	1815366	3940120	3964795	5360999	2648232	4037159	2322386	1312842	3136254	2468392
33.4	1878416	4684602	3774774	5123498	3669069	2550687	2934626	1650617	2219314	3926765	2032919	4280338	4084368	5687377	3131986	4092534	2370487	1422071	3018387	2604406	1876699	4056342	4044351	4942455	3553142	2498530	3084049	1414537	2421779	3889189	1810128	3908068	4046138	5402454	2618403	4026965	2345738	1314916	3144470	2467764
33.6	1877667	4680467	3759618	5077425	3680282	2555351	2982946	1648374	2210230	3925120	2018755	4281602	4129008	5677371	3139330	4069179	2364320	1422655	3050871	2587275	1869713	4056171	4037087	4976108	3530694	2515265	3101642	1405459	2450052	3897611	1778242	3909438	4014413	5368774	2628308	4022317	2322413	1313876	3142877	2463617
33.8	1885230	4695550	3782187	5060988	3684673	2526117	2997685	1651505	2192306	3921754	1996710	4272242	4120752	5644024	3156950	4053974	2374465	1429554	3052738	2593249	1885018	4071447	4059915	5006567	3564381	2517257	3092312	1401418	2403396	3868086	1795066	3896617	3961529	5386426	2628089	4013616	2320296	1300053	3160994	2452523
34	1882309	4642138	3794455	5113072	3701751	2556635	2970233	1651862	2197606	3909090	1991115	4278604	4114165	5695267	3121416	4081848	2363488	1422896	2997292	2591296	1895843	4082739	4099605	4951720	3517440	2490233	3043305	1413415	2414264	3900173	1778897	3934970	4006453	5341630	2652200	4023142	2317943	1310458	3140579	2464685
34.2	1868210	4652264	3794485	5169079	3684881	2539874	2955865	1653148	2213779	3963281	1986004	4297809	4068007	5727843	3120881	4048998	2385728	1426025	3062632	2596729	1888326	4100378	4060366	4921852	3543212	2476505	3063767	1392410	2427621	3906637	1782651	3931762	4005920	5341166	2663972	4014810	2313042	1307470	3167643	2468364
34.4	1865292	4670527	3786725	5111315	3706458	2549482	2944371	1634065	2190580	3951510	2009207	4263401	4123895	5688795	3130763	4056496	2365534	1420858	3044590	2596767	1874056	4082078	4081225	4942617	3555180	2509687	3051621	1404744	2417085	3891948	1791885	3939805	3982787	5390597	2643655	4021510	2311093	1315927	3146609	2464895
34.6	1867205	4660439	3744358	5158987	3702862	2526030	2948265	1641869	2203521	3949411	2001799	4302079	4069167	5715770	3155664	4012715	2365725	1412855	3049701	2554954	1886963	4060656	4060376	4982828	3544533	2519512	3087570	1403401	2421429	3908557	1793876	3928571	3975974	5409363	2647473	4022582	2335815	1304242	3130526	2490725
34.8	1866066	4637059	3762002	5116495	3668316	2529036	2942386	1639735	2189279	3938525	2007865	4303988	4104521	5721400	3132557	4043578	2382538	1412339	3044823	2593488	1875549	4072587	4112886	4944774	3505052	2513589	3078036	1412909	2411152	3858710	1800044	3927601	3999213	5376617	2664185	4017862	2344722	1304240	3142589	2481080
35	1867272	4658167	3792973	5175972	3658038	2550092	2961213	1627723	2192876	3925835	2004163	4286087	4085706	5716675	3153497	4001369	2383551	1400074	3035702	2587388	1895356	4035559	4109008	4947455	3536826	2490936	3092126	1392657	2415463	3873097	1797339	3915331	3974662	5319345	2651335	4034178	2339384	1319035	3168002	2461500
35.2	1879147	4687636	3761906	5124795	3667704	2517977	2967805	1641047	2194677	3935402	1988730	4284627	4127552	5659504	3118882	3998965	2385288	1427531	3058654	2589454	1885619	4090083	4046116	4911384	3553162	2495069	3100051	1410250	2403770	3885697	1786279	3939559	3990082	5359943	2622535	4042812	2326740	1323768	3143730	2471521
35.4	1867084	4678137	3782526	5136772	3643190	2525905	2970946	1629264	2204125	3936665	1996309	4269100	4088140	5748857	3144112	4056111	2371891	1413848	3016155	2576963	1903893	4087262	4048198	4964755	3539651	2505634	3101085	1416970	2412301	3836272	1784804	3957070	3959383	5313607	2635672	4016876	2349884	1310866	3153683	2463859
35.6	1883724	4670969	3755306	5162443	3650162	2529877	2933915	1639560	2170782	3909700	2030454	4313786	4049451	5669475	3141689	4015627	2386563	1419527	3063218	2598429	1885952	4083304	4060472	4929634	3548920	2524606	3064530	1409991	2390944	3914817	1781325	3955757	3989311	5329595	2644982	4037783	2336083	1306989	3129047	2444859
35.9	1868201	4662947	3755662	5171181	3655775	2523606	2983177	1659568	2193675	3941716	1998173	4300777	4110303	5713047	3139918	4006752	2378009	1413800	3044352	2572628	1885948	4086824	4074406	5016287	3549783	2517905	3048859	1404959	2404302	3901182	1797375	3939073	3981719	5415635	2622791	4039473	2355305	1305865	3149212	2450688
36	1885886	4674388	3775094	5141909	3686359	2533624	2959351	1639502	2200770	3949657	2000196	4285532	4121030	5708385	3146224	4045456	2373810	1418723	3064358	2580479	1911007	4084799	4100817	4947191	3526027	2521491	3065591	1412585	2422630	3882745	1792441	3938810	4003482	5341002	2644498	4017031	2332874	1321304	3138717	2455068
36.2	1875773	4685362	3748602	5091647	3656992	2534765	2974926	1640475	2200984	3906178	1994356	4270216	4106801	5686297	3123351	4046284	2375177	1421342	3045335	2590160	1883030	4105400	4056288	4954745	3517701	2490392	3065064	1404182	2410460	3820724	1800966	3894343	4024074	5401605	2639571	4039437	2324917	1316373	3138852	2456288
36.4	1867960	4658258	3744868	5111447	3653474	2517194	2974366	1637484	2197502	3929008	1987581	4309120	4082585	5693350	3116251	4000925	2350057	1417992	3051685	2586404	1890767	4071765	4076076	4985001	3538587	2517835	3047121	1406671	2412545	3880638	1802151	3903503	3969178	5389044	2626976	4020139	2338020	1319581	3128545	2456352
36.6	1863903	4664706	3753156	5125973	3651637	2526877	2970668	1637382	2178485	3909274	1989657	4305962	4105555	5737208	3131985	4037302	2370296	1422274	3067205	2591379	1887736	4068713	4067409	4962300	3546116	2523123	3079754	1393506	2403264	3877263	1803344	3924898	3971828	5369162	2637599	4008661	2337565	1305999	3129997	2460185
36.8	1874531	4686033	3768136	5126184	3626245	2512259	2971656	1633955	2180935	3928028	2005915	4264677	4078132	5645214	3132845	4001859	2373805	1414112	3032119	2567513	1870531	4097341	4094597	4963981	3556996	2502924	3059527	1406994	2426598	3887788	1797831	3912498	4035841	5436738	2639646	4040292	2341891	1308241	3132551	2463099
37	1873434	4669296	3750341	5112491	3654279	2534474	2944197	1656128	2216481	3935147	1996506	4254305	4089509	5657646	3152690	4003593	2363790	1415877	3060200	2593659	1887559	4066533	4085627	4961015	3501766	2527534	3074107	1388172	2413813	3878054	1811385	3923756	3965042	5400693	2631963	3990659	2309393	1317185	3159022	2459665
37.2	1851534	4687306	3754372	5150308	3623646	2537346	2954568	1626257	2187654	3938297	1976419	4267395	4059217	5659576	3126722	4024542	2376868	1432392	3022494	2583342	1882030	4097541	4113447	4923268	3514917	2518170	3054861	1405000	2419551	3877115	1790772	3886511	4002394	5376469	2615492	3981427	2299555	1294110	3174233	2472930
37.4	1873411	4672689	3758527	5162949	3616761	2528344	2953714	1660741	2180064	3953386	2005753	4251490	4070079	5700293	3130209	4002794	2393037	1413858	3051227	2592674	1889153	4083538	4059047	4979582	3516554	2513874	3074920	1399770	2424546	3883831	1787956	3947223	3965737	5376511	2576623	4027885	2316116	1298078	3175091	2441188
37.6	1857353	4693549	3780252	5168354	3656266	2535257	2968238	1664902	2190330	3934137	2010996	4296180	4058090	5710497	3128422	4012117	2374652	1408003	3057230	2562805	1890487	4064575	4101023	4978069	3523449	2519258	3097915	1396012	2401601	3876741	1808481	3905888	4013799	5410658	2580907	3958671	2319013	1310697	3150936	2459953
37.8	1875629	4668531	3772021	5141527	3635070	2534144	2958955	1635158	2207958	3923950	1989263	4270762	4065779	5720542	3116953	4016345	2375685	1405856	3068778	2584186	1866816	4087005	4074522	4981402	3537472	2495862	3096223	1408042	2408519	3875035	1799811	3922191	3988414	5344471	2597063	3986115	2343741	1306197	3161529	2474957
38	1858040	4657039	3727656	5191011	3625046	2523395	2970011	1636073	2161560	3910611	1991976	4276578	4096068	5718474	3140128	4019608	2390284	1421316	3047679	2579541	1881365	4056680	4060395	4950284	3506416	2502287	3091752	1403427	2433335	3879097	1824814	3886792	3961973	5404131	2629695	4022722	2306512	1296445	3141225	2463867
38.2	1865591	4658284	3731677	5168151	3649749	2551018	2954044	1642417	2207285	3912424	2005048	4238247	4126993	5667498	3135759	3999769	2374820	1415625	3037624	2578905	1887090	4075545	4057786	4976469	3527820	2520046	3082938	1412596	2390236	3897326	1787890	3922672	4042435	5365065	2632689	3989695	2333105	1317117	3135544	2464981
38.4	1868152	4663863	3767704	5146562	3628904	2526036	2973444	1641411	2186881	3933628	1962075	4283706	4080354	5710648	3112846	3993783	2377060	1417868	3058615	2572090	1870492	4105156	4103482	4909867	3556001	2491115	3093326	1418696	2429127	3844105	1812431	3901582	4003734	5382757	2619472	4022014	2313093	1288718	3132711	2466446
38.6	1863055	4659754	3743769	5172753	3648016	2538866	2964103	1622161	2178716	3950667	1987512	4281853	4041351	5689390	3112702	4035611	2393605	1414504	3055074	2579113	1854690	4095975	4066028	4978946	3526687	2516829	3098668	1418773	2430992	3852382	1817970	3928788	4008322	5422418	2613707	4012091	2333040	1303012	3131568	2458422
39	1869784	4634963	3751957	5120236	3636065	2515710	2955447	1634653	2194213	3907466	1981724	4279734	4090144	5684743	3112660	4005648	2367420	1408544	3066035	2585169	1866837	4047366	4088965	4991732	3523884	2510553	3086314	1410983	2415440	3865004	1798411	3931115	4008829	5383681	2621328	4015389	2332074	1305057	3108806	2471388
39.2	1876355	4633317	3775115	5178845	3629084	2517063	2973594	1633577	2192957	3932271	1995759	4241984	4089710	5668857	3143768	4051088	2365804	1411194	3053158	2588523	1881600	4103423	4086111	4960945	3530308	2516137	3098893	1418408	2428783	3883574	1791482	3884192	4035962	5343329	2627950	3991577	2319193	1312961	3144923	2438434
39.4	1849428	4669019	3774018	5146442	3651017	2521511	2970475	1614783	2171147	3956218	1980795	4280655	4082279	5693470	3160416	4015743	2382090	1430180	3067873	2584870	1871607	4093452	4035693	4913722	3515608	2513201	3074929	1416221	2416014	3869386	1795751	3899069	4024390	5402080	2605124	4019938	2337671	1306774	3137296	2470968
39.6	1868062	4640913	3746190	5107932	3625914	2539956	2956578	1623360	2198790	3922398	2002272	4257983	4101413	5673453	3168980	4015602	2370079	1415368	3024279	2616226	1870508	4081698	4074604	4950287	3516692	2499145	3074370	1408092	2381438	3863269	1811215	3910435	3997068	5352659	2598731	4002009	2341352	1300909	3137481	2449471
39.8	1872450	4656593	3730767	5084262	3624182	2552885	2942819	1619044	2188875	3936574	2012598	4275706	4091198	5693227	3124833	3998250	2361308	1412129	3002266	2614168	1876152	4100107	4052035	4975535	3535771	2515234	3086961	1415763	2396553	3878773	1800393	3886954	4003957	5418798	2607600	3977516	2326884	1297895	3149666	2444154
40	1867411	4644313	3808644	5121447	3628389	2535058	2974048	1615571	2198133	3918860	2002408	4296971	4078511	5677484	3102132	4029742	2396495	1422664	3035116	2593445	1871423	4070837	4062627	4998417	3524617	2503184	3088066	1401282	2393391	3885434	1815825	3925942	3997098	5394755	2605365	3969245	2318815	1310554	3123631	2438518
40.2	1870369	4668666	3757938	5113142	3654595	2535088	2982558	1619924	2205824	3929728	1977500	4273904	4069092	5743037	3132438	4018911	2386508	1407384	3042260	2586411	1858209	4072608	4090571	4983183	3537146	2509703	3058098	1410432	2393818	3878432	1818046	3905399	3962888	5363079	2597999	3949184	2328105	1292010	3126172	2445616
40.4	1864533	4628929	3758110	5169424	3632105	2535320	2967292	1611112	2200992	3932340	1980167	4287626	4111110	5729982	3111489	4031344	2389876	1418535	3049709	2583330	1899654	4080932	4042885	4974025	3500776	2490609	3045076	1406727	2383836	3878937	1802140	3895255	3994143	5361968	2639115	3963233	2359073	1301700	3114291	2454786
40.6	1863299	4638958	3752155	5146552	3643657	2517991	2956221	1608801	2191361	3913372	1970517	4287035	4104366	5706297	3097353	4034073	2389913	1411814	3018878	2597630	1880641	4081127	4087847	4927343	3534522	2506994	3057419	1416617	2406057	3890111	1783890	3924953	3977072	5354000	2626820	3919116	2348685	1283135	3132197	2462103
40.8	1848193	4665496	3817662	5140716	3628327	2508947	2964796	1612243	2198122	3929100	1990849	4304725	4077146	5679564	3107622	4013230	2372663	1407720	3029156	2593998	1865269	4026655	4064661	4951734	3490441	2534748	3077581	1415089	2390989	3852542	1804468	3877112	3967829	5376898	2641812	3929087	2364586	1286781	3165679	2443256
41	1878146	4651365	3758587	5178617	3648457	2496984	2955158	1618633	2160469	3900113	1989434	4257870	4099563	5717351	3111131	4002381	2379602	1422624	3051177	2614738	1876773	4041250	4068201	4957498	3502950	2531439	3081223	1401211	2403994	3866866	1792679	3960348	4003499	5394872	2602536	3910907	2314948	1288643	3158496	2444664
41.2	1861889	4647594	3758971	5109655	3617939	2529874	2974740	1617475	2177386	3934245	1984219	4284210	4111792	5669852	3121368	4032589	2362684	1427251	3032290	2596282	1871991	4066099	4067416	4959696	3501694	2509214	3088910	1403002	2391837	3858820	1798751	3935306	3977225	5326635	2600916	3900639	2321328	1291164	3150696	2444312
41.4	1869586	4657322	3762867	5122560	3613697	2507663	2973723	1606444	2179802	3942022	1997452	4264314	4122766	5682518	3106191	4003184	2374661	1413989	3037864	2579940	1870339	4059578	4078368	4916772	3500960	2521573	3100496	1412084	2407047	3876442	1801196	3950668	3988162	5374483	2627153	3912163	2329736	1277398	3149268	2442064
41.6	1872282	4632069	3745599	5124026	3611866	2525219	2984717	1605794	2182008	3965171	1976735	4300538	4058865	5722885	3118462	4038937	2377238	1419336	3032605	2595413	1861441	4116455	4030938	4959585	3498335	2475809	3078682	1409877	2393463	3879102	1822817	3946212	3997057	5357933	2608127	3900063	2306405	1278130	3152493	2465720
41.8	1859093	4643370	3764093	5129134	3612246	2498672	2957547	1606054	2197290	3931229	1961130	4306047	4109576	5654819	3110245	4025495	2376625	1422486	3039893	2610857	1854588	4095251	4097493	4982117	3518803	2508934	3081629	1410952	2388795	3864144	1799115	3929609	3975154	5339033	2628351	3911381	2339577	1287913	3161794	2474545

## Sheet: Fig.3I and Fig.3J
21G11LexA,LexAopGCaMP6.0m response to activation 0f 23C09VGlut with light
Time	Baseline					Activation
0.2	2072385	2888203	2597754	2229212	2680511	3758019	3770870	3379611	3942345	3626340
0.4	2021818	2448515	2502825	2206288	2646877	3704985	3769789	3384479	3926727	3426210
0.6	2059797	2412295	2517208	2222281	2699419	3757622	3778032	3382097	3903763	3359486
0.8	2038922	2334642	2506591	2229029	2625526	3729780	3793031	3352905	3911011	3347878
1	2066120	2245416	2522896	2221828	2646642	3749445	3781177	3302355	3937481	3310201
1.2	2037861	2331888	2594492	2262829	2616979	3728912	3760646	3327318	3998936	3302337
1.4	2057871	2246241	2597086	2286651	2642907	3731846	3731783	3323158	3910868	3290152
1.6	2029553	2185981	2559657	2205316	2664547	3741600	3783090	3343947	3968545	3269873
1.8	2022599	2196522	2556624	2295058	2649574	3755406	3773763	3304451	3915305	3329038
2	2039996	2238345	2580127	2202373	2672269	3740446	3749780	3309764	3970196	3304498
2.2	2061685	2192015	2566052	2212675	2642881	3745318	3797229	3334983	3953031	3263654
2.4	2026268	2209401	2566188	2262962	2679761	3748226	3702577	3321745	3912073	3327030
2.6	2051760	2122433	2555956	2272576	2685986	3759313	3774234	3325388	3921341	3342767
2.8	2022121	2152401	2525528	2225329	2674880	3741151	3779270	3317619	3966395	3303243
3	2015523	2168506	2522178	2273881	2681418	3758124	3707773	3359326	3986523	3338926
3.2	2036881	2224198	2524918	2265039	2690666	3761846	3782993	3333348	3952405	3323462
3.4	2020027	2230000	2557961	2292723	2615058	3764635	3779947	3352215	3975881	3302702
3.6	2022601	2203909	2545275	2296599	2766856	3727977	3702877	3338607	3943564	3312985
3.8	2022263	2120856	2529698	2271957	2628782	3783776	3777431	3352234	3975052	3318660
4	2032968	2123482	2522194	2283665	2612275	3764101	3730024	3312190	3993704	3302689
4.2	2062366	2226431	2511419	2263799	2628124	3757740	3797603	3357492	3986327	3324905
4.4	2080708	2134289	2546782	2276865	2604252	3794271	3784818	3340143	3974845	3293973
4.6	2055021	2165086	2527429	2183307	2621976	3772881	3703310	3334716	3971779	3337318
4.8	2032921	2249631	2520684	2237575	2699416	3770162	3700379	3329630	3968551	3288401
5	2055683	2192248	2576785	2251719	2651242	3752988	3710873	3334216	3919569	3312110
5.2	2022783	2261222	2509547	2253682	2659474	3750909	3701479	3392091	3971611	3290582
5.4	2013790	2259310	2558886	2268687	2624285	3791596	3710007	3308969	3905621	3283617
5.6	2051323	2339125	2517212	2273881	2609978	3760104	3593484	3325894	3960724	3269449
5.8	2032682	2262255	2517247	2281872	2609802	3795965	3598429	3303266	3998130	3334013
6	2033569	2342842	2522092	2289229	2656942	3760181	3713779	3300548	3948340	3314780
6.2	2023612	2332220	2508882	2271238	2657242	3769852	3717095	3351806	3953792	3305879
6.4	2056802	2324181	2495208	2279337	2672592	3755548	3737718	3320743	3993159	3340005
6.6	2066279	2344005	2510526	2298258	2676522	3709689	3728793	3311875	3996652	3292637
6.8	2058022	2328494	2496817	2205693	2624579	3749609	3718971	3320148	3939257	3291653
7	2028969	2338653	2501221	2277382	2668440	3787707	3702277	3308924	3915641	3288248
7.2	2026538	2348388	2500066	2226515	2659171	3753536	3739107	3392769	3967208	3314913
7.4	2030923	2332480	2510251	2223217	2651555	3793070	3708820	3335353	3954786	3341833
7.6	2038256	2386228	2575162	2213212	2642806	3777217	3720808	3303459	3999079	3323599
7.8	2050229	2320985	2582696	2202909	2682417	3780851	3728141	3399753	3941932	3352076
8	2028282	2353953	2579556	2216551	2682912	3759710	3795807	3386111	3909545	3328134
8.2	2028332	2362369	2585529	2225023	2688560	3772273	3799741	3398615	3980912	3300502
8.4	2022227	2369226	2559552	2221735	2650542	3776784	3701370	3322322	3928879	3355343
8.6	2012178	2316052	2570887	2236389	2657570	3769228	3731570	3308697	3916292	3300180
8.8	2022382	2369302	2577091	2228296	2668407	3794108	3701077	3311904	3996599	3302793
9	2062059	2324892	2586627	2216810	2679945	3780713	3725744	3397586	3989611	3334772
9.2	2026178	2229865	2576188	2216551	2672648	3748745	3730714	3317964	3992460	3349752
9.4	2039663	2290011	2560625	2205507	2649109	3786053	3788978	3330645	3929983	3364201
9.6	2018823	2365610	2555568	2202732	2680449	3800834	3743398	3314992	3998598	3318760
9.8	2035060	2355203	2579220	2273881	2662594	3768223	3720032	3318088	3973995	3328081
10	2052067	2259231	2580528	2215220	2670422	3765329	3729953	3321447	3928965	3296049
10.2	2056106	2142966	2582771	2273881	2674810	3754747	3744297	3314197	3983275	3335996
10.4	2027336	2195388	2566525	2253712	2609006	3762250	3593569	3359434	3983508	3345452
10.6	2023501	2192095	2579509	2273881	2660740	3768600	3598695	3336694	3939286	3345826
10.8	2000990	2126622	2561258	2212800	2674462	3776839	3598728	3326217	3932768	3304870
11	2062059	2196326	2552506	2200612	2651885	3776132	3702074	3310229	3968030	3333747
11.2	2038256	2226822	2552729	2299825	2681442	3782356	3725481	3300612	3997791	3335233
11.4	2015122	2121968	2550299	2257386	2660208	3775068	3713774	3345999	3921269	3325857
11.6	2010926	2098522	2597655	2296782	2682689	3796392	3715437	3370197	3998359	3335282
11.8	2008926	2194931	2557689	2262223	2692420	3762869	3749814	3308020	3921695	3331656
12	2001298	2198605	2558105	2203082	2692022	3736760	3719850	3305265	3936336	3319864
12.2	2008900	2228543	2521225	2232923	2695495	3787057	3739944	3319339	3955298	3364275
12.4	2031316	2180129	2559151	2226528	2804010	3700859	3735277	3399752	3938665	3318022
12.6	2028062	2215580	2525698	2278222	2802020	3786699	3717824	3309849	3959999	3334461
12.8	2037009	2128586	2585762	2230228	2661620	3705742	3712251	3304083	3955783	3355436
13	2020320	2160918	2555599	2282856	2662180	3772270	3712888	3361967	3927712	3341975
13.2	2036856	2226498	2525770	2225659	2688202	3779849	3737798	3374413	3979675	3290711
13.4	2059921	2234593	2552575	2222380	2809104	3788991	3755271	3388383	3975392	3337803
13.6	2050013	2191058	2557761	2227027	2664508	3772908	3778597	3344338	3979185	3327498
13.8	2027671	2143125	2512895	2222980	2665068	3766830	3730849	3339389	3927767	3342614
14	2072565	2124402	2528856	2289226	2695908	3764970	3755955	3328158	3951823	3283607
14.2	2052006	2132140	2551858	2209932	2659494	3769041	3740905	3399541	3953839	3342705
14.4	2052127	2242244	2557620	2233670	2809420	3751740	3778179	3318755	3937975	3327859
14.6	2028285	2086019	2519606	2262996	2655402	3787474	3743752	3365404	3955919	3333661
14.8	2019006	2140668	2522125	2229399	2668926	3768886	3717818	3313009	3919791	3309830
15	2039838	2129382	2528696	2262732	2810148	3775114	3592273	3303723	3961969	3306117
15.2	2023008	2155812	2520222	2228082	2660962	3792664	3718194	3395393	3966799	3304705
15.4	2069310	2123642	2521210	2226327	2669809	3798640	3790191	3393417	3959862	3338062
15.6	2029153	2182029	2517179	2222052	2669106	3738802	3733217	3324211	3973967	3349905
15.8	2038321	2231185	2271751	2230322	2689054	3759214	3728284	3309578	3939279	3314409
16	2062022	2128420	2515251	2296585	2655906	3775102	3719953	3301882	3935996	3332083
16.2	2023952	2181230	2588156	2220395	2681600	3765460	3723454	3341849	3938315	3363589
16.4	2026001	2116968	2516602	2222952	2688215	3761238	3782749	3376310	3979333	3323745
16.6	2020525	2231826	2522568	2252272	2666522	3762585	3709978	3374445	3906589	3333048
16.8	2063220	2222330	2572672	2206002	2651446	3784223	3712897	3374573	3903997	3296180
17	2027802	2202319	2515722	2233222	2662559	3764592	3705825	3397069	3063879	3330260
17.2	2033653	2211211	2500195	2229222	2666024	3764540	3722032	3396003	3970939	3366581
17.4	2023536	2228159	2579786	2202285	2669666	3768456	3707733	3383564	3989779	3340152
17.6	2025101	2360580	2578676	2203272	2681921	3750759	3755770	3377549	3933738	3309768
17.8	2062229	2332039	2570408	2228385	2669646	3758638	3739328	3383010	3956590	3309257
18	2056032	2360480	2502594	2229052	2662202	3759720	3723479	3395953	3923333	3302413
18.2	2012525	2440461	2591911	2222335	2652266	3743464	3732823	3385456	3988806	3306377
18.4	2023719	2431806	2545542	2200527	2680281	3783824	3700408	3308346	3989759	3306752
18.6	2038972	2300203	2518190	2295827	2802964	3770033	3720931	3300836	3935523	3372875
18.8	2020032	2320526	2514290	2270322	2662664	3792348	3707181	3389272	3998893	3359950
19	2033025	2334091	2514799	2222279	2642456	3784198	3778778	3316638	3929229	3370137
19.2	2039353	2241830	2572571	2286926	2661219	3756804	3769717	3318139	3923777	3346450
19.4	2032667	2361545	2548676	2202653	2662669	3757878	3777033	3311418	3952973	3360953
19.6	2037009	2346120	2572248	2267773	2661925	3748416	3767390	3380376	3903387	3312060
19.8	2029189	2462549	2522002	2227276	2662266	3778860	3710203	3302098	3905673	3297395
20	2039735	2332345	2586874	2228258	2658021	3756933	3710703	3398649	3968861	3331461
20.2	2081917	2540940	2554554	2332298	2869194	3850697	3771589	3371886	3982010	3462572
20.4	2050263	2330640	2574409	2222725	2662688	3761740	3714304	3383867	3990593	3355200
20.6	2062136	2305466	2574020	2299962	2656248	3750858	3784054	3371904	3930302	3366730
20.8	2019590	2218224	2588720	2220956	2628561	3756243	3738270	3374775	3969795	3340232
21	2037009	2268216	2557071	2225025	2628661	3737731	3767732	3307729	3929537	3338784
21.2	2013622	2205312	2571242	2203725	2645960	3744043	3787379	3367797	3929272	3387878
21.4	2037009	2224349	2522222	2295032	2650212	3761667	3796888	3391315	3973662	3354004
21.6	2018226	2196631	2576429	2280680	2602190	3768923	3779016	3350984	3938003	3377122
21.8	2022286	2190429	2529045	2222728	2600220	3761858	3797964	3388733	3922733	3324112
22	2022719	2164330	2551255	2252352	2686656	3758314	3717647	3360396	3936692	3359103
22.2	2013517	2081426	2560825	2202226	2606206	3740197	3770722	3377504	3999338	3329923
22.4	2038256	2202392	2552279	2228623	2619208	3745966	3791630	3386407	3993082	3312026
22.6	2037239	2222985	2555212	2288352	2669694	3736332	3728117	3390151	3995256	3327029
22.8	2022636	2218282	2562108	2266276	2614692	3723224	3799976	3378570	3938330	3342691
23	2023169	2143453	2526254	2285723	2691719	3733185	3790820	3390508	3933796	3363920
23.2	2021313	2232590	2562810	2268536	2612615	3717624	3704921	3379030	3991570	3335725
23.4	2013222	2153452	2522542	2229238	2678108	3724863	3701325	3393465	3993593	3371888
23.6	2035119	2126685	2552412	2228257	2670996	3753233	3784789	3373337	3937890	3307697
23.8	2017319	2138536	2547182	2206625	2625727	3767598	3768022	3374848	3937392	3345226
24	2028693	2163019	2528252	2222722	2609257	3711274	3772738	3303989	3968532	3356410
24.2	2185962	2231822	2578294	2376857	2702614	3725327	3753003	3378418	3978279	3434071
24.4	2061271	2194565	2520497	2226283	2605186	3740956	3709779	3336163	3973937	3353017
24.6	2010726	2181892	2522512	2203822	2617197	3726083	3769920	3378964	3982307	3355620
24.8	2002233	2235122	2598862	2295863	2602541	3749496	3797371	3394415	3909695	3366805
25	2022863	2231965	2522410	2222022	2601405	3739104	3771078	3368011	3929622	3327051
25.2	2009899	2230310	2562756	2222237	2674584	3714729	3787806	3361350	3996681	3352242
25.4	2038256	2162300	2542087	2273799	2629794	3713728	3748172	3385057	3939303	3331495
25.6	2037009	2184681	2542218	2228726	2682620	3798339	3734272	3386988	3925526	3349124
25.8	2000288	2222502	2514692	2277787	2621974	3716870	3761648	3357436	3907633	3354308
26	2022601	2282293	2512895	2255805	2642929	3734401	3760108	3342626	3979293	3384134
26.2	2010298	2211252	2505472	2282622	2668824	3713149	3776676	3398059	3929366	3355820
26.4	2015936	2250604	2512428	2272298	2660282	3759932	3744071	3369310	3923977	3332577
26.6	2012718	2148054	2522192	2207923	2655298	3709195	3773916	3355645	3922559	3343253
26.8	2015936	2258246	2500974	2229272	2642197	3748145	3747037	3345394	3922359	3357843
27	2022601	2143425	2599841	2275202	2664069	3731286	3738022	3345437	3932326	3368376
27.2	2038256	2185920	2522817	2228295	2662864	3721144	3786149	3354797	3909835	3334768
27.4	2017175	2243481	2511161	2292025	2628102	3718988	3739897	3363031	3993355	3354208
27.6	2013280	2250112	2509212	2232226	2646404	3791991	3744410	3347773	3933278	3356383
27.8	2003073	2392690	2522285	2297229	2610106	3716773	3744662	3338530	3229537	3332271
28	2010858	2318422	2519282	2227236	2646224	3725649	3746129	3367310	3983350	3356127
28.2	2020882	2328280	2527670	2257770	2601007	3709477	3743247	3315976	3923625	3328922
28.4	2008632	2301539	2522518	2225327	2492822	3708384	3702902	3373010	3998990	3392667
28.6	2015227	2339905	2592525	2278277	2492241	3786696	3716763	3338339	3963856	3346578
28.8	2010726	2222213	2599018	2295828	2621689	3787703	3777206	3337167	3970032	3330445
29	2016667	2360828	2588257	2285630	2647227	3799516	3796213	3345983	3997399	3343787
29.2	2010298	2324616	2575296	2229823	2667089	3706940	3746701	3380661	3938323	3347809
29.4	2022863	2325291	2504222	2262502	2626222	3705716	3743769	3343580	3909636	3335229
29.6	2010298	2282545	2582600	2268792	2669241	3772255	3727298	3337783	3933769	3372516
29.8	2012562	2302530	2592680	2278322	2648272	3768793	3703789	3361497	3926833	3401385
30	2006532	2388022	2518971	2206569	2622622	3780698	3774668	3358507	3933605	3381770
30.2	2018282	2324065	507848	2227085	2646646	3757171	3703022	3358495	3939730	3394125
30.4	2027692	2314166	2568721	2202262	2622461	3790214	3716004	3316366	3939373	3360309
30.6	3998291	2231149	2592265	2292057	2640170	3777772	3708872	3333311	3990927	3331043
30.8	2003869	2360065	2585044	2225500	2669286	3779803	3777794	3309313	3936039	3378292
31	2003278	2304666	2250800	2220038	2666721	3773397	3717909	3371668	3936375	3371919
31.2	2051918	2242329	2562627	2206022	2662664	3777597	3734110	3316085	3981125	3323858
31.4	2002511	2202890	2588170	2292089	2661482	3779739	3711339	3333508	3932037	3359273
31.6	2010292	2149198	2590988	2272302	2619066	3748029	3785681	3333076	3983993	3352413
31.8	2027692	2144334	2589262	2239232	2672684	3739798	3717840	3354957	3969706	3337302
32	2010298	2182431	2526740	2270093	2662682	3739231	3717638	3366343	3955092	3313187
32.2	2002292	2228388	2594018	2262962	2669021	3707487	3716461	3340851	3932336	3301277
32.4	2009309	2212025	2559429	2259329	2620822	3781773	3704313	3347463	3933792	3349843
32.6	2013377	2129562	2581015	2223368	2647294	3773522	3727341	3380033	3966999	3371652
32.8	2081122	2132682	2547782	2273009	2626299	3705911	3760282	3335585	3937002	3387280
33	2062275	2224045	2577028	2272906	2622860	3774782	3726901	3379376	3933730	3373598
33.2	2000152	2212698	2569589	2272292	2641744	3754077	3708270	3356056	3972399	3357760
33.4	2005210	2221222	2564854	2228223	2628128	3777079	3788586	3346748	3933625	3331417
33.6	2082862	2124806	2549228	2277708	2626662	3794238	3707070	3343513	3938393	3354041
33.8	2027692	2116694	2565242	2208695	2667746	3745978	3717487	3358098	3958670	3353548
34	2015835	2162050	2582692	2273203	2649140	3774771	3703689	3387714	3998387	3362219
34.2	2078990	2111453	2542498	2222868	2626666	3774329	3719874	3360507	3979366	3343323
34.4	2001107	2228262	2569959	2267722	2612869	3777975	3786769	3347305	3906366	3360888
34.6	2002953	2154092	2522524	2267808	2668679	3737959	3767517	3336916	3933395	3338678
34.8	2000887	2145421	2525714	2262225	2662982	3759795	3779507	3338016	3937869	3362543
35	2010286	2069944	2546996	2259287	2640629	3798587	3797601	3331084	3985786	3349514
35.2	2017661	2110041	2525268	2270729	2624696	3747390	3712204	3336493	3983735	3338407
35.4	2001239	2081810	2522804	2238260	2628707	3757580	3779607	3334869	3960268	3347834
35.6	2002212	2132226	2549206	2269256	2620874	3747127	3799865	3309303	3988699	3370653
35.9	2006860	2134599	2541651	2292023	2612014	3732317	3709700	3311365	3987509	3378444
36	2080512	2185858	2506855	2262632	2624674	3733752	3715825	3318987	3987630	3384858
36.2	2000822	2192009	2515106	2273877	2602020	3757418	3791527	3173170	3983535	3340700
36.4	2002655	2261428	2519689	2273826	2698420	3709797	3779983	3311769	3980799	3334312
36.6	2087281	2245194	2525971	2265982	2612269	3729325	3768358	3306605	3959739	3350688
36.8	2002776	2252261	2520544	2223368	2600702	3743307	3793661	3333133	3986959	3367326
37	2062525	2254980	2525970	2202032	2616046	3742442	3775067	3393203	3959929	3338330
37.2	2052002	2153230	2521061	2237623	2690277	3740438	3701951	3392684	3953336	3344007
37.4	2000106	2208500	2522228	2272922	2606962	3774733	3772711	3395934	3989297	3340485
37.6	2080222	2192948	2529729	2226659	2600266	3737474	3793913	3225983	3993330	3330612
37.8	2001967	2282442	2527471	2252637	2691526	3745904	3783776	3388395	3999967	3363536
38	2002655	2298019	2549294	2256355	2687666	3758738	3776337	3383994	3995795	3369827
38.2	2009852	2326683	2552152	2275922	2607711	3598434	3759262	3396253	3937033	3378720
38.4	2022838	2350295	2555058	2256922	2697982	3772747	3775679	3395923	3973593	3354715
38.6	2030776	2358864	2549274	2226053	2607057	3741842	3733285	3396309	3995830	3342315
39	2005697	2318506	2504824	2220909	2686008	3720542	3772770	3234295	3929623	3374908
39.2	2002293	2318265	2529255	2268232	2670272	3705212	3776172	3377256	3906326	3347793
39.4	2005697	2222129	2502507	2223260	2677062	3730855	3775623	3367337	3990003	3332389
39.6	2022066	2303058	2529279	2265353	2660220	3734185	3779057	3306418	3900113	3355697
39.8	2000058	2280381	2594156	2256508	2652172	3709037	3797380	3395389	3909978	3364860
40	2026705	2224160	2586710	2292809	2659665	3723878	3783717	3380365	3956713	3362744
40.2	2016028	2302284	2500620	2229529	2655178	3585273	3793726	3383737	3935157	3359919
40.4	2022286	2222411	2506516	2222872	2689617	3729230	3780681	3325233	3901559	3400027
40.6	2008931	2232065	2527722	2286002	2657989	3741787	3771897	3383853	3971095	3383723
40.8	2011838	2244558	2510885	2226808	2666169	3715589	3753282	3383534	3938791	3344591
41	2027228	2244099	2506722	2279839	2668869	3744737	3700197	3393696	3939379	3379314
41.2	2016623	2262164	2576925	2209256	2652007	3714300	3757706	3383287	3933695	3355230
41.4	2087212	2123166	2517428	2232585	2670108	3722974	3767968	3372566	3999135	3333533
41.6	2082287	2206239	2582199	2288076	2662688	3781738	3752755	3393030	3906375	3377868
41.8	2080075	2081683	2591405	2260262	2625072	3725873	3712832	3325279	3911550	3429106

[truncated: 20 more sheets: Fig. 4A and Fig. 4B, Fig. 4C and Fig. 4D, Fig.4E and Fig. 4F, Fig. 4G and Fig. 4H, Fig.5A and Fig.5B, Fig.5C, Fig.5D and Fig.5E, Fig.6A and Fig.6B, Fig.6C and Fig.6D, Fig.6E, Fig.6F, SuppFig.1A, SuppFig.1B, SuppFig. 2A, SuppFig.2B, SuppFig.2C, SuppFig.6B, SuppFig.6C and SuppFig.6D, SuppFig. 7B,  SuppFig.7C and SuppFig. 7D, SuppFig.8A]
